# Supplementary material
Source: PubMed Central journal article supplement (PMC7443361)
Supplement: 253_2020_10842_MOESM1_ESM.pdf [file 253_2020_10842_MOESM1_ESM.pdf]

## Applied Microbiology and Biotechnology

### Characterization of anti-BCG benz[ $\alpha$ ]anthraquinones and new siderophores from a Xinjiang-desert-isolated rare actinomycete, *Nocardia* sp. XJ31

Li Zhang,<sup>1,2,4,†</sup> Jingyu Zhang,<sup>1,†</sup> Biao Ren,<sup>3</sup> Wanying Lu,<sup>1</sup> Chengjian Hou,<sup>1</sup> Jian Wang,<sup>2</sup> Xiaolong Ma,<sup>2</sup> Rong Ma,<sup>1</sup> Mei Liu,<sup>2</sup> Zhiheng Liu,<sup>2</sup> Jin-Ping Li,<sup>5</sup> Kan Ding,<sup>6</sup> Huanqin Dai,<sup>2,\*</sup> Lixin Zhang<sup>1</sup>, Xueting Liu<sup>1,\*</sup>

<sup>1</sup>State Key Laboratory of Bioreactor Engineering, East China University of Science and Technology, Shanghai 200237, China

<sup>2</sup>Key Laboratory of Pathogenic Microbiology and Immunology, Institute of Microbiology, Chinese Academy of Sciences, Beijing, 100101, China

<sup>3</sup>State Key Laboratory of Oral Diseases & National Clinical Research Center for Oral Diseases, West China Hospital of Stomatology, Sichuan University, Chengdu, 610041, China

<sup>4</sup>Department of Chemistry, Boston University, Boston, MA 02215, US

<sup>5</sup>Department of Medical Biochemistry and Microbiology, SciLifeLab Uppsala, The Biomedical Center, University of Uppsala, Uppsala, Sweden

<sup>6</sup>Glycochemistry & Glycobiology Lab, Key Laboratory of Receptor Research, Shanghai Institute of Materia Medica, Chinese Academy of Sciences, Shanghai, 201203, China, University of Chinese Academy of Sciences, No. 19(A) Yuquan Road, Beijing, 100049, China

<sup>†</sup>These authors contributed equally to this work.

\*Corresponding authors. E-mail: liuxueting@ecust.edu.cn (X. Liu); daihuanqin@139.com (H. Dai).

## Table of Contents

|                                                                                                                      |    |
|----------------------------------------------------------------------------------------------------------------------|----|
| Table S1 Selective isolation media for rare Actinomycetes .....                                                      | 5  |
| Table S2 Components of 21 fermentation media for OSMAC strategy.....                                                 | 5  |
| Table S3 Detailed information of sampling sites .....                                                                | 6  |
| Fig. S1a <sup>1</sup> H NMR (500 MHz, Pyridine- <i>d</i> <sub>5</sub> ) spectrum of 1a.....                          | 8  |
| Fig. S1b <sup>13</sup> C NMR (125 MHz, Pyridine- <i>d</i> <sub>5</sub> ) spectrum of 1a .....                        | 8  |
| Fig. S1c HR-ESI-MS spectrum of 1a.....                                                                               | 9  |
| Fig. S2a <sup>1</sup> H NMR (500 MHz, Pyridine- <i>d</i> <sub>5</sub> ) spectrum of 2a.....                          | 9  |
| Fig. S2b <sup>13</sup> C NMR (125 MHz, Pyridine- <i>d</i> <sub>5</sub> ) spectrum of 2a .....                        | 10 |
| Fig. S2c HR-ESI-MS spectrum of 2a.....                                                                               | 10 |
| Fig. S3a <sup>1</sup> H NMR (500 MHz, Pyridine- <i>d</i> <sub>5</sub> ) spectrum of 3a.....                          | 11 |
| Fig. S3b <sup>13</sup> C NMR (125 MHz, Pyridine- <i>d</i> <sub>5</sub> ) spectrum of 3a .....                        | 11 |
| Fig. S3c HR-ESI-MS spectrum of 3a.....                                                                               | 12 |
| Table S4 NMR data ( <sup>1</sup> H NMR 500 MHz, <sup>13</sup> C NMR 125 MHz, Pyridine- <i>d</i> <sub>5</sub> ) of 4a | 12 |
| Fig. S4a HR-ESI-MS spectrum of 4a .....                                                                              | 13 |
| Fig. S4b <sup>1</sup> H NMR (500 MHz, Pyridine- <i>d</i> <sub>5</sub> ) spectrum of 4a.....                          | 13 |
| Fig. S4c <sup>13</sup> C NMR (125 MHz, Pyridine- <i>d</i> <sub>5</sub> ) spectrum of 4a .....                        | 14 |
| Fig. S4d HSQC (500 MHz/125 MHz, Pyridine- <i>d</i> <sub>5</sub> ) spectrum of 4a .....                               | 14 |
| Fig. S4e <sup>1</sup> H- <sup>1</sup> H COSY (500 MHz, Pyridine- <i>d</i> <sub>5</sub> ) spectrum of 4a.....         | 15 |
| Fig. S4f HMBC (500 MHz/125 MHz, Pyridine- <i>d</i> <sub>5</sub> ) spectrum of 4a .....                               | 15 |
| Table S5 NMR data ( <sup>1</sup> H NMR 500 MHz, <sup>13</sup> C NMR 125 MHz, Pyridine- <i>d</i> <sub>5</sub> ) of 5a | 15 |
| Fig. S5a HR-ESI-MS spectrum of 5a .....                                                                              | 17 |
| Fig. S5b <sup>1</sup> H NMR (500 MHz, Pyridine- <i>d</i> <sub>5</sub> ) spectrum of 5a.....                          | 17 |
| Fig. S5c <sup>13</sup> C NMR (125 MHz, Pyridine- <i>d</i> <sub>5</sub> ) spectrum of 5a .....                        | 18 |
| Fig. S5d <sup>1</sup> H- <sup>1</sup> H COSY (500 MHz, Pyridine- <i>d</i> <sub>5</sub> ) spectrum of 5a .....        | 18 |
| Fig. S5e HSQC (500 MHz/125 MHz, Pyridine- <i>d</i> <sub>5</sub> ) spectrum of 5a.....                                | 19 |
| Fig. S5f HMBC (500 MHz/125 MHz, Pyridine- <i>d</i> <sub>5</sub> ) spectrum of 5a .....                               | 19 |
| Table S6 NMR data ( <sup>1</sup> H NMR 500 MHz, <sup>13</sup> C NMR 125 MHz, Pyridine- <i>d</i> <sub>5</sub> ) of 6a | 19 |
| Fig. S6a HR-ESI-MS spectrum of 6a .....                                                                              | 21 |
| Fig. S6b <sup>1</sup> H NMR (500 MHz, Pyridine- <i>d</i> <sub>5</sub> ) spectrum of 6a.....                          | 21 |
| Fig. S6c <sup>13</sup> C NMR (125 MHz, Pyridine- <i>d</i> <sub>5</sub> ) spectrum of 6a .....                        | 22 |
| Fig. S6d <sup>1</sup> H- <sup>1</sup> H COSY (500 MHz, Pyridine- <i>d</i> <sub>5</sub> ) spectrum of 6a .....        | 22 |
| Fig. S6e HSQC (500 MHz/125 MHz, Pyridine- <i>d</i> <sub>5</sub> ) spectrum of 6a .....                               | 23 |
| Fig. S6f HMBC (500 MHz/125 MHz, Pyridine- <i>d</i> <sub>5</sub> ) spectrum of 6a .....                               | 23 |

|                                                                                                                  |    |
|------------------------------------------------------------------------------------------------------------------|----|
| Table S7 NMR data ( $^1\text{H}$ NMR 500 MHz, $^{13}\text{C}$ NMR 125 MHz, Pyridine- $d_5$ ) of compound 7a..... | 23 |
| Fig. S7a HR-ESI-MS spectrum of 7a .....                                                                          | 25 |
| Fig. S7b $^1\text{H}$ NMR (500 MHz, Pyridine- $d_5$ ) spectrum of 7a.....                                        | 25 |
| Fig. S7c $^{13}\text{C}$ NMR (125 MHz, Pyridine- $d_5$ ) spectrum of 7a .....                                    | 26 |
| Fig. S7d $^1\text{H}$ - $^1\text{H}$ COSY (500 MHz, Pyridine- $d_5$ ) spectrum of 7a .....                       | 26 |
| Fig. S7e HSQC (500 MHz/125 MHz, Pyridine- $d_5$ ) spectrum of 7a.....                                            | 27 |
| Fig. S7f HMBC (500 MHz/125 MHz, Pyridine- $d_5$ ) spectrum of 7a .....                                           | 27 |
| Table S8 NMR data ( $^1\text{H}$ NMR 500 MHz, $^{13}\text{C}$ NMR 125 MHz, Pyridine- $d_5$ ) of 8a.....          | 27 |
| Fig. S8a HR-ESI-MS spectrum of 8a .....                                                                          | 29 |
| Fig. S8b $^1\text{H}$ NMR (500 MHz, Pyridine- $d_5$ ) spectrum of 8a.....                                        | 29 |
| Fig. S8c $^{13}\text{C}$ NMR (125 MHz, Pyridine- $d_5$ ) spectrum of 8a.....                                     | 30 |
| Fig. S8d $^1\text{H}$ - $^1\text{H}$ COSY (500 MHz, Pyridine- $d_5$ ) spectrum of 8a .....                       | 30 |
| Fig. S8e HSQC (500 MHz/125 MHz, Pyridine- $d_5$ ) spectrum of 8a.....                                            | 31 |
| Fig. S8f HMBC (500 MHz/125 MHz, Pyridine- $d_5$ ) spectrum of 8a .....                                           | 31 |
| Table S9 NMR data ( $^1\text{H}$ NMR 500 MHz, $^{13}\text{C}$ NMR 125 MHz, Pyridine- $d_5$ ) of 9a.....          | 31 |
| Fig. S9a HR-ESI-MS spectrum of 9a .....                                                                          | 33 |
| Fig. S9b $^1\text{H}$ NMR (500 MHz, Pyridine- $d_5$ ) spectrum of 9a.....                                        | 33 |
| Fig. S9c $^{13}\text{C}$ NMR (125 MHz, Pyridine- $d_5$ ) spectrum of 9a .....                                    | 34 |
| Fig. S9d $^1\text{H}$ - $^1\text{H}$ COSY (500 MHz, Pyridine- $d_5$ ) spectrum of 9a .....                       | 34 |
| Fig. S9e HSQC (500 MHz/125 MHz, Pyridine- $d_5$ ) spectrum of 9a.....                                            | 35 |
| Fig. S9f HMBC (500 MHz/125 MHz, Pyridine- $d_5$ ) spectrum of 9a .....                                           | 35 |
| Table S10 NMR data ( $^1\text{H}$ NMR 500 MHz, $^{13}\text{C}$ NMR 125 MHz, Pyridine- $d_5$ ) of 10a .....       | 35 |
| Fig. S10a HR-ESI-MS spectrum of 10a .....                                                                        | 37 |
| Fig. S10b $^1\text{H}$ NMR (500 MHz, Pyridine- $d_5$ ) spectrum of 10a.....                                      | 37 |
| Fig. S10c $^{13}\text{C}$ NMR (125 MHz, Pyridine- $d_5$ ) spectrum of 10a .....                                  | 38 |
| Fig. S10d $^1\text{H}$ - $^1\text{H}$ COSY (500 MHz, Pyridine- $d_5$ ) spectrum of 10a .....                     | 38 |
| Fig. S10e HSQC (500 MHz/125 MHz, Pyridine- $d_5$ ) spectrum of 10a.....                                          | 39 |
| Fig. S10f HMBC (500 MHz/125 MHz, Pyridine- $d_5$ ) spectrum of 10a .....                                         | 39 |
| Table S11 NMR data ( $^1\text{H}$ NMR 500 MHz, $^{13}\text{C}$ NMR 125 MHz, Pyridine- $d_5$ ) of 11a.....        | 40 |
| Fig. S11a HR-ESI-MS spectrum of 11a.....                                                                         | 41 |
| Fig. S11b $^1\text{H}$ NMR (500 MHz, Pyridine- $d_5$ ) spectrum of 11a.....                                      | 41 |
| Fig. S11c $^{13}\text{C}$ NMR (125 MHz, Pyridine- $d_5$ ) spectrum of 11a.....                                   | 42 |
| Fig. S11d $^1\text{H}$ - $^1\text{H}$ COSY (500 MHz, Pyridine- $d_5$ ) spectrum of 11a.....                      | 42 |
| Fig. S11e HSQC (500 MHz/125 MHz, Pyridine- $d_5$ ) spectrum of 11a .....                                         | 43 |

|                                                                                                                                                                                                                               |           |
|-------------------------------------------------------------------------------------------------------------------------------------------------------------------------------------------------------------------------------|-----------|
| Fig. S11f HMBC (500 MHz/125 MHz, Pyridine- <i>d</i> <sub>5</sub> ) spectrum of 11a.....                                                                                                                                       | 43        |
| Table S12 NMR data ( <sup>1</sup> H NMR 500 MHz, <sup>13</sup> C NMR 125 MHz, Pyridine- <i>d</i> <sub>5</sub> ) of 12a                                                                                                        | 43        |
| Fig. S12a HR-ESI-MS spectrum of 12a .....                                                                                                                                                                                     | 45        |
| Fig. S12b <sup>1</sup> H NMR (500 MHz, Pyridine- <i>d</i> <sub>5</sub> ) spectrum of 12a.....                                                                                                                                 | 45        |
| Fig. S12c <sup>13</sup> C NMR (125 MHz, Pyridine- <i>d</i> <sub>5</sub> ) spectrum of 12a.....                                                                                                                                | 46        |
| Fig. S12d <sup>1</sup> H- <sup>1</sup> H COSY (500 MHz, Pyridine- <i>d</i> <sub>5</sub> ) spectrum of 12a .....                                                                                                               | 46        |
| Fig. S12e HSQC (500 MHz/125 MHz, Pyridine- <i>d</i> <sub>5</sub> ) spectrum of 12a.....                                                                                                                                       | 47        |
| Fig. S12f HMBC (500 MHz/125 MHz, Pyridine- <i>d</i> <sub>5</sub> ) spectrum of 12a .....                                                                                                                                      | 47        |
| Table S13 NMR data ( <sup>1</sup> H NMR 500 MHz, <sup>13</sup> C NMR 125 MHz, CDCl <sub>3</sub> ) of 13 .....                                                                                                                 | 47        |
| Fig. S13a HR-ESI-MS spectrum of 13 .....                                                                                                                                                                                      | 48        |
| Fig. S13b UV-vis spectrum of 13.....                                                                                                                                                                                          | 49        |
| Fig. S13c <sup>1</sup> H NMR (500 MHz, CDCl <sub>3</sub> ) spectrum of 13 .....                                                                                                                                               | 49        |
| Fig. S13d <sup>13</sup> C NMR (125 MHz, CDCl <sub>3</sub> ) spectrum of 13 .....                                                                                                                                              | 50        |
| Table S14 NMR data ( <sup>1</sup> H NMR 500 MHz, <sup>13</sup> C NMR 125 MHz, CD <sub>3</sub> OD) of 14 ...                                                                                                                   | 50        |
| Fig. S14a HR-ESI-MS spectrum of 14 .....                                                                                                                                                                                      | 51        |
| Fig. S14b UV-vis spectrum of 14.....                                                                                                                                                                                          | 51        |
| Fig. S14c <sup>1</sup> H NMR (500 MHz, CD <sub>3</sub> OD) spectrum of 14 .....                                                                                                                                               | 52        |
| Fig. S14d <sup>13</sup> C NMR (125 MHz, CD <sub>3</sub> OD) spectrum of 14 .....                                                                                                                                              | 52        |
| Fig. S14e <sup>1</sup> H- <sup>1</sup> H COSY (500 MHz, CD <sub>3</sub> OD) spectrum of 14.....                                                                                                                               | 53        |
| Fig. S14f HSQC (500 MHz/125 MHz, CD <sub>3</sub> OD) spectrum of 14.....                                                                                                                                                      | 53        |
| Fig. S14g HMBC (500 MHz/125 MHz, CD <sub>3</sub> OD) spectrum of 14.....                                                                                                                                                      | 54        |
| Fig. S15 Neighbor-joining phylogenetic tree of 16S rRNA gene sequences of 59<br>actinomycetes (including 19 strains <i>Streptomyces</i> and 40 strains rare actinomycetes) and<br>related species constructed by MEGA 7. .... | 错误!未定义书签。 |
| Virtual screen of isolated compounds 1–12 for potential virus polymerase inhibitor                                                                                                                                            | 56        |
| Table S13 The binding affinities of isolated compounds 1–12 and via virtual docking<br>approach .....                                                                                                                         | 错误!未定义书签。 |

**Table S1** Selective isolation media for rare Actinomycetes

| Media                                 | Component                                                                                                                                                                                                                                                                                                                                                                                                                                                         |
|---------------------------------------|-------------------------------------------------------------------------------------------------------------------------------------------------------------------------------------------------------------------------------------------------------------------------------------------------------------------------------------------------------------------------------------------------------------------------------------------------------------------|
| HV agar [83]                          | Humic acid 1 g, Na <sub>2</sub> HPO <sub>4</sub> 0.5 g, KCl 1.7 g, MgSO <sub>4</sub> ·7H <sub>2</sub> O 0.05 g, FeSO <sub>4</sub> ·7H <sub>2</sub> O 0.01 g, CaCl <sub>2</sub> 1 g, mixed vitamin 3.7 mg, agar 20 g, distilled water 1 L, pH 7.0-7.2, autoclave at 121°C, 20 min, then add 100 mg of cycloheximide and 20 mg of nalidixic acid.                                                                                                                   |
| SM3 agar [84]                         | Tryptone 3 g, peptone 5 g, NaCl 5 g, glucose 10 g, agar 20 g, distilled water 1 L, pH 7.0, autoclave at 121°C, 20 min, then add 10 mg of nalidixic acid, 50 mg of nystatin and 50 mg of cycloheximide.                                                                                                                                                                                                                                                            |
| MOPS agar                             | MOPS 5 g, proline 1 g, (NH <sub>4</sub> ) <sub>2</sub> SO <sub>4</sub> 1 g, NaCl 1 g, CaCl <sub>2</sub> 2 g, K <sub>2</sub> HPO <sub>4</sub> 1 g, MgSO <sub>4</sub> ·7H <sub>2</sub> O 1 g, agar 20 g, distilled water 1 L, pH 7.2, autoclave at 121°C, 20 min, then add 10 mg of nalidixic acid and 50 mg of Cycloheximide.                                                                                                                                      |
| starch-Casein-Nitrate agar (SCN) [85] | Starch 10 g, casein vitamin free 0.3 g, KNO <sub>3</sub> 2 g, K <sub>2</sub> HPO <sub>4</sub> 2 g, MgSO <sub>4</sub> ·7H <sub>2</sub> O 0.05 g, FeSO <sub>4</sub> ·7H <sub>2</sub> O 0.01 g, CaCO <sub>3</sub> 0.02 g, agar 20 g, distilled water 1 L, pH 7.0-7.2, autoclave at 121°C, 20 min, then add 25 mg of novobiocin, 50 mg of nystatin and 50 mg of cycloheximide.                                                                                        |
| AV (arginine vitamime) agar [86]      | L-arginine 0.3 g, glycerol 1 g, K <sub>2</sub> HPO <sub>4</sub> 0.3 g, MgSO <sub>4</sub> ·7H <sub>2</sub> O 0.2 g, NaCl 0.3 g, trace solution 1 mL, agar 20 g, distilled water 1 L, pH 7.3, autoclave at 121°C, 20 min, then add 10 mg of nalidixic acid and 50 mg of cycloheximide.<br>Trace solution: FeSO <sub>4</sub> ·7H <sub>2</sub> O 0.1g, MnCl <sub>2</sub> ·4H <sub>2</sub> O 0.1g, ZnSO <sub>4</sub> ·7H <sub>2</sub> O 0.1g, H <sub>2</sub> O 100 mL. |

**Table S2** Components of 21 fermentation media for OSMAC strategy

| Media | Component                                                                                                                                                                                                                                                                                                                                                                                                                                                                                                             |
|-------|-----------------------------------------------------------------------------------------------------------------------------------------------------------------------------------------------------------------------------------------------------------------------------------------------------------------------------------------------------------------------------------------------------------------------------------------------------------------------------------------------------------------------|
| P2    | Yeast extract 4 g, malt extract 10 g, dextrose 4 g, distilled water 1 L, pH 7.2                                                                                                                                                                                                                                                                                                                                                                                                                                       |
| Sa    | soluble starch 10 g, yeast extract 4 g, peptone 2 g, Fe <sub>2</sub> (SO <sub>4</sub> ) <sub>3</sub> ·4H <sub>2</sub> O 0.04 g, KBr 0.1 g, distilled water 1 L                                                                                                                                                                                                                                                                                                                                                        |
| GT    | Soluble starch 20 g, L-Asparagine 0.5 g, KNO <sub>3</sub> 1 g, K <sub>2</sub> HPO <sub>4</sub> 0.5 g, NaCl 0.5 g, MgSO <sub>4</sub> ·7H <sub>2</sub> O 0.5 g, CaCO <sub>3</sub> 1 g, distilled water 1 L, pH 7.5                                                                                                                                                                                                                                                                                                      |
| VER01 | Soluble starch 10 g, dextrose 10 g, glycerin 10 g, corn syrup powder 2.5 g, peptone 5 g, yeast extract 2 g, NaCl 1 g, CaCO <sub>3</sub> 3 g, distilled water 1 L, pH 7.5                                                                                                                                                                                                                                                                                                                                              |
| AM1   | Soluble starch 20 g, dextrose 4 g, K <sub>2</sub> HPO <sub>4</sub> 0.5 g, KNO <sub>3</sub> 1.0 g, MgSO <sub>4</sub> ·7H <sub>2</sub> O 0.5 g, FeSO <sub>4</sub> ·7H <sub>2</sub> O 0.01 g, pH 7.0-7.2                                                                                                                                                                                                                                                                                                                 |
| AM2   | Soluble starch 5 g, dextrose 20 g, Soy flour 10 g, peptone 2 g, yeast extract 2 g, NaCl 4 g, K <sub>2</sub> HPO <sub>4</sub> 0.5 g, MgSO <sub>4</sub> ·7H <sub>2</sub> O 0.5 g, CaCO <sub>3</sub> 2 g, distilled water 1 L, pH 7.8                                                                                                                                                                                                                                                                                    |
| AM3   | yeast extract 4 g, malt extract 10 g, dextrose 4 g, distilled water 1 L, pH 7.2                                                                                                                                                                                                                                                                                                                                                                                                                                       |
| NM    | Dextrose 5 g, soluble starch 10 g, peptone 10 g, soybean peptone 10 g, yeast extract 3 g, KNO <sub>3</sub> 1.0 g, one-fold Trace element solution 0.2 mL, CaCO <sub>3</sub> 1 g, distilled water 1 L, pH 7.0. Trace element solution (1 fold): FeSO <sub>4</sub> 4 g, MnSO <sub>4</sub> 5 g, ZnSO <sub>4</sub> ·7H <sub>2</sub> O 2.5 g, Borax 1.4 g, CoCl <sub>2</sub> ·6H <sub>2</sub> O 0.2 g, CuSO <sub>4</sub> ·5H <sub>2</sub> O 0.5 g, MgSO <sub>4</sub> ·2H <sub>2</sub> O 0.2 g, distilled water 1 L, pH 7.2 |
| NM2   | Dextrose 1 g, lactose 10 g, glycerin 20 mL, soybean peptone 5 g, NH <sub>4</sub> NO <sub>3</sub> 1.5 g, yeast extract 1 g, one-fold Trace element solution 0.2 mL, distilled water 1 L, pH 6.0                                                                                                                                                                                                                                                                                                                        |
| MM1   | Dextrose 10 g, soluble starch 10 g, Soy flour 15 g, NaCl 3 g, K <sub>2</sub> HPO <sub>4</sub> 1 g, MgSO <sub>4</sub> ·7H <sub>2</sub> O 1 g, FeSO <sub>4</sub> ·7H <sub>2</sub> O 0.001 g, CuSO <sub>4</sub> ·5H <sub>2</sub> O 0.007 g, MnCl <sub>2</sub> ·4H <sub>2</sub> O 0.008 g, ZnSO <sub>4</sub> ·5H <sub>2</sub> O 0.002 g, distilled water 1 L, pH 7.0                                                                                                                                                      |
| M001  | Soluble starch 20 g, yeast extract 8.0 g, peptone 4.0 g, CaCO <sub>3</sub> 1.0 g, distilled water 1 L, pH 7.2                                                                                                                                                                                                                                                                                                                                                                                                         |
| M1    | Soluble starch 10 g, yeast extract 4 g, peptone 2 g, distilled water 1 L, pH 7.2                                                                                                                                                                                                                                                                                                                                                                                                                                      |
| M6    | Beef extract 4 g, peptone 4 g, yeast extract 1 g, dextrose 10 g, distilled water 1 L, pH 7.2                                                                                                                                                                                                                                                                                                                                                                                                                          |
| M8    | Soluble starch 15 g, yeast extract 4 g, K <sub>2</sub> HPO <sub>4</sub> 1 g, MgSO <sub>4</sub> 0.5 g, distilled water 1 L, pH 7.2                                                                                                                                                                                                                                                                                                                                                                                     |
| M9    | Soluble starch 20 g, KNO <sub>3</sub> 1.0 g, K <sub>2</sub> HPO <sub>4</sub> 0.5 g, MgSO <sub>4</sub> 0.5 g, FeSO <sub>4</sub> 0.01 g, distilled                                                                                                                                                                                                                                                                                                                                                                      |

|       |                                                                                                                                                                                                                                                                                                                                                                                        |
|-------|----------------------------------------------------------------------------------------------------------------------------------------------------------------------------------------------------------------------------------------------------------------------------------------------------------------------------------------------------------------------------------------|
|       | water 1 L, pH 7.2                                                                                                                                                                                                                                                                                                                                                                      |
| M10   | Yeast extract 24 g, K <sub>2</sub> HPO <sub>4</sub> 9.4 g, KH <sub>2</sub> PO <sub>4</sub> 2.2 g, distilled water 1 L, pH 7.2                                                                                                                                                                                                                                                          |
| M11   | NaCl 5 g, Enzymatic hydrolysis of casein 15 g, Soy flour papain 5 g, distilled water 1 L, pH 7.2                                                                                                                                                                                                                                                                                       |
| M12   | Peptone 5 g, yeast extract 1 g, sodium citrate 0.2 g, NaCl 19.45 g, MnCl <sub>2</sub> 5.9 g, MgSO <sub>4</sub> 3.24 g, CaCl <sub>2</sub> 1.8 g, KCl 0.55 g, NaHCO <sub>3</sub> 0.5 g, KBr 0.08 g, SrCl <sub>2</sub> 0.034 g, boric acid 0.022 g, sodium silicate 0.004 g, NaF 0.002 g, ammonium nitrate 0.0016 g, Na <sub>2</sub> PO <sub>4</sub> 0.008 g, distilled water 1 L, pH 7.2 |
| Noc02 | Sucrose 20 g, tryptone 10 g, K <sub>2</sub> HPO <sub>4</sub> 0.5 g, NaCl 0.5 g, FeSO <sub>4</sub> ·7H <sub>2</sub> O 0.01 g, distilled water 1 L, pH 6.5                                                                                                                                                                                                                               |
| Noc03 | Starch 5.0 g, soybean flour 20.0 g, peptone 2.0 g, glucose 20.0 g, yeast extract 2.0 g, NaCl 4.0 g, K <sub>2</sub> HPO <sub>4</sub> 0.5 g, MgSO <sub>4</sub> ·7H <sub>2</sub> O 0.5 g, CaCO <sub>3</sub> 2.0 g, distilled water 1 L                                                                                                                                                    |
| Noc05 | Starch 10 g, glucose 10 g, glycerol 10 g, corn steep powder 2.5 g, peptone 5 g, yeast extract 2 g, NaNO <sub>3</sub> 1 g, CaCO <sub>3</sub> 3 g, distilled water 1 L, pH 7.2                                                                                                                                                                                                           |

**Table S3** Detailed information of sampling sites

| Sample ID | Environment       | Sample description                          | Coordinate                 | Altitude | Temperature |
|-----------|-------------------|---------------------------------------------|----------------------------|----------|-------------|
| 1#        | Plateau river     | River sediment                              | 38°41.406 N<br>74°58.391 E | 3368 m   | 19.4°C      |
| 2#        | Desert highway    | Saline and alkali soil                      | 39°51.924 N<br>80°57.832 E | 1057 m   | 28.2°C      |
| 3#        | Tianshan mountain | Red mineral soil                            | 42°21.736 N<br>88°40.162 E | 1639 m   | 44.5°C      |
| 4#        | Desert river      | Soil on plant root, 10 cm below surface     | 40°36.804 N<br>79°41.260 E | 1058 m   | 30.0°C      |
| 5#        | Desert river      | Red sediment, 10 cm below surface           | 40°36.804 N<br>79°41.260 E | 1058 m   | 30.0°C      |
| 6#        | Desert river      | Saline and alkali soil                      | 40°36.804 N<br>79°41.260 E | 1058 m   | 30.0°C      |
| 7#        | Desert land       | Saline and alkali soil, 30 cm below surface | 39°51.901 N<br>77°47.002 E | 1154 m   | 38.7°C      |
| 8#        | Plateau lake      | Lake sediment                               | 38°22.681 N<br>75°02.775 E | 3655 m   | 17.1°C      |
| 9#        | Arid land         | Soil, 20 cm below surface                   | 42°04.680 N<br>87°10.059 E | 1063 m   | 36.0°C      |
| 10#       | Flaming mountain  | Soil                                        | 42°55.476 N<br>89°30.779 E | < 0 m    | 51.5°C      |
| 11#       | Flaming mountain  | Red soil                                    | 42°55.476 N<br>89°30.779 E | < 0 m    | 51.5°C      |
| 12#       | Flaming mountain  | Soil                                        | 42°55.476 N<br>89°30.779 E | < 0 m    | 51.5°C      |
| 13#       | Aydingkol Lake    | Saline and alkali sand soil                 | 42°42.677 N<br>89°02.695 E | -150 m   | 42.0°C      |
| 14#       | Kanerjing         | River sediment                              | 43° 38.61 N<br>90°39.411 E | < 0 m    | 31.9°C      |
| 15#       | Desert highway    | Soil on plant root                          | 40°11.443 N<br>81°1.201 E  | 1029 m   | 22.4°C      |

|     |               |                |   |   |   |
|-----|---------------|----------------|---|---|---|
| 16# | Plateau river | River sediment | - | - | - |
| 17# | Plateau river | River sediment | - | - | - |

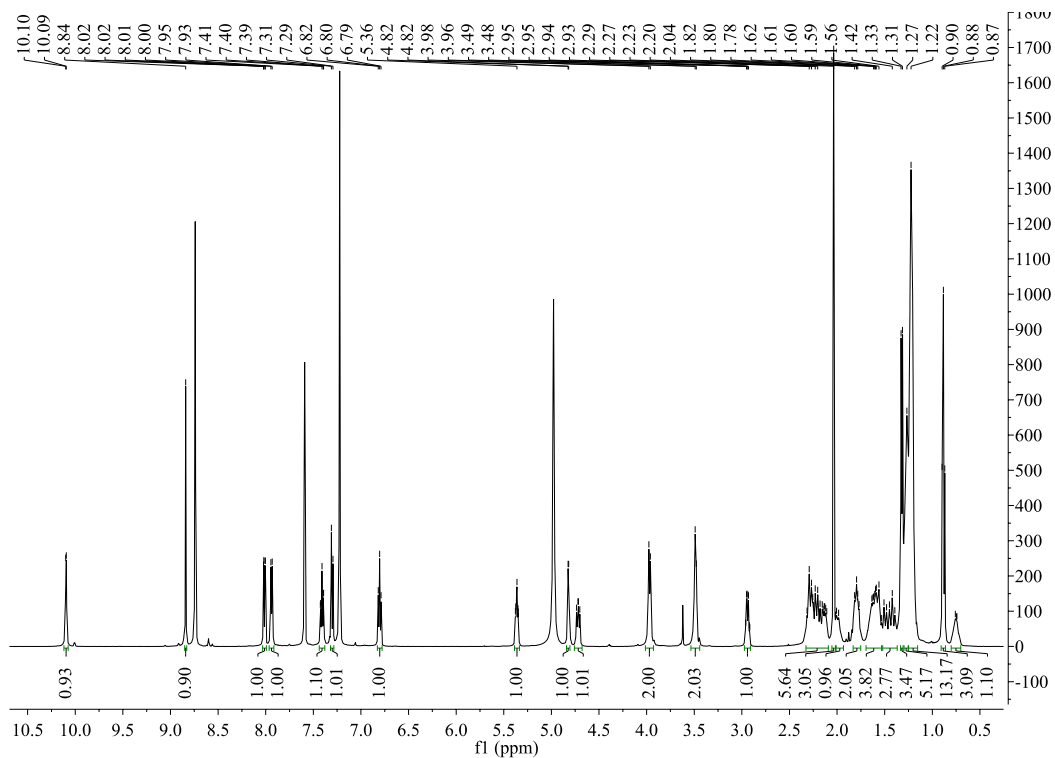

**Fig. S1a**  $^1\text{H}$  NMR (500 MHz, Pyridine- $d_5$ ) spectrum of **1a**

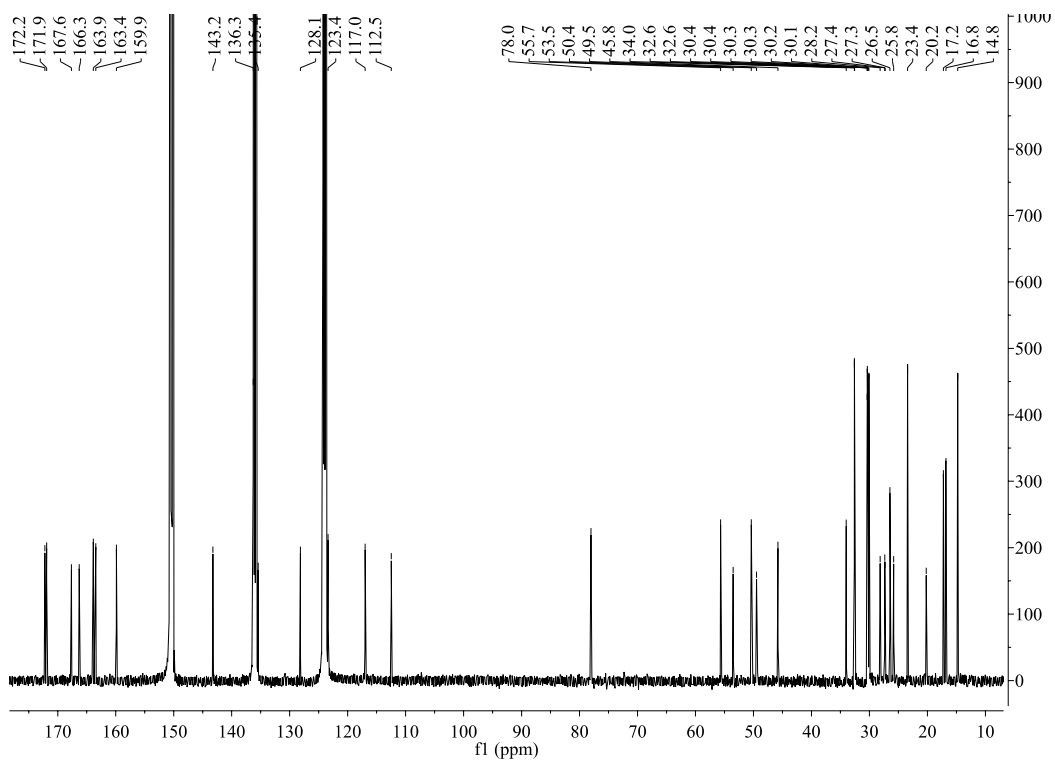

**Fig. S1b**  $^{13}\text{C}$  NMR (125 MHz, Pyridine- $d_5$ ) spectrum of **1a**



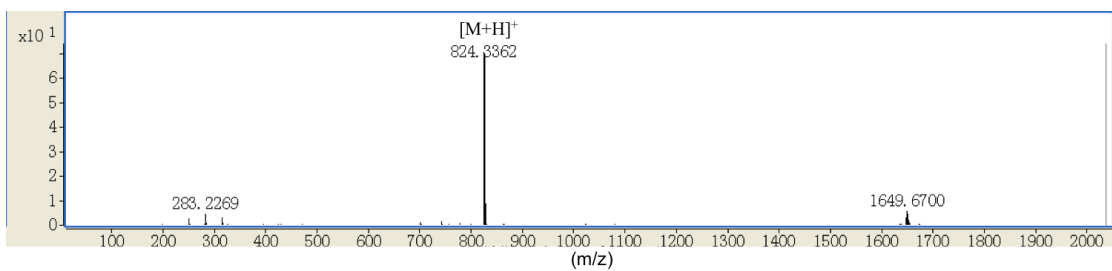

**Fig. S1c** HR-ESI-MS spectrum of **1a**

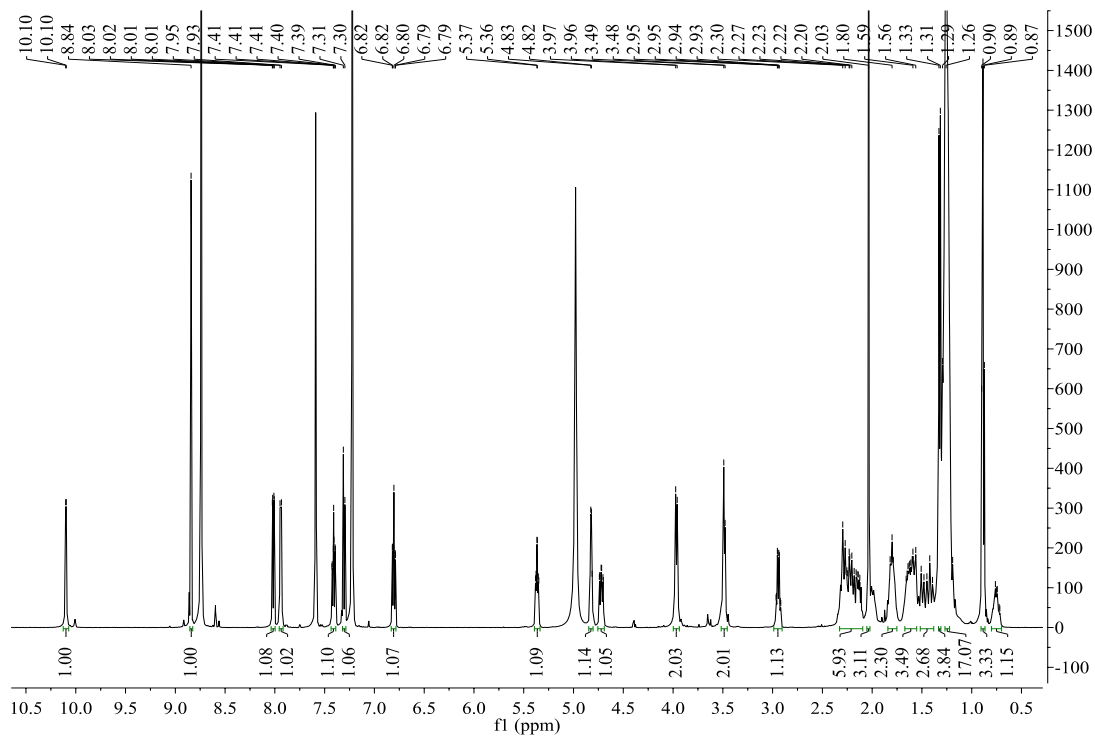

**Fig. S2a** <sup>1</sup>H NMR (500 MHz, Pyridine-*d*<sub>5</sub>) spectrum of **2a**

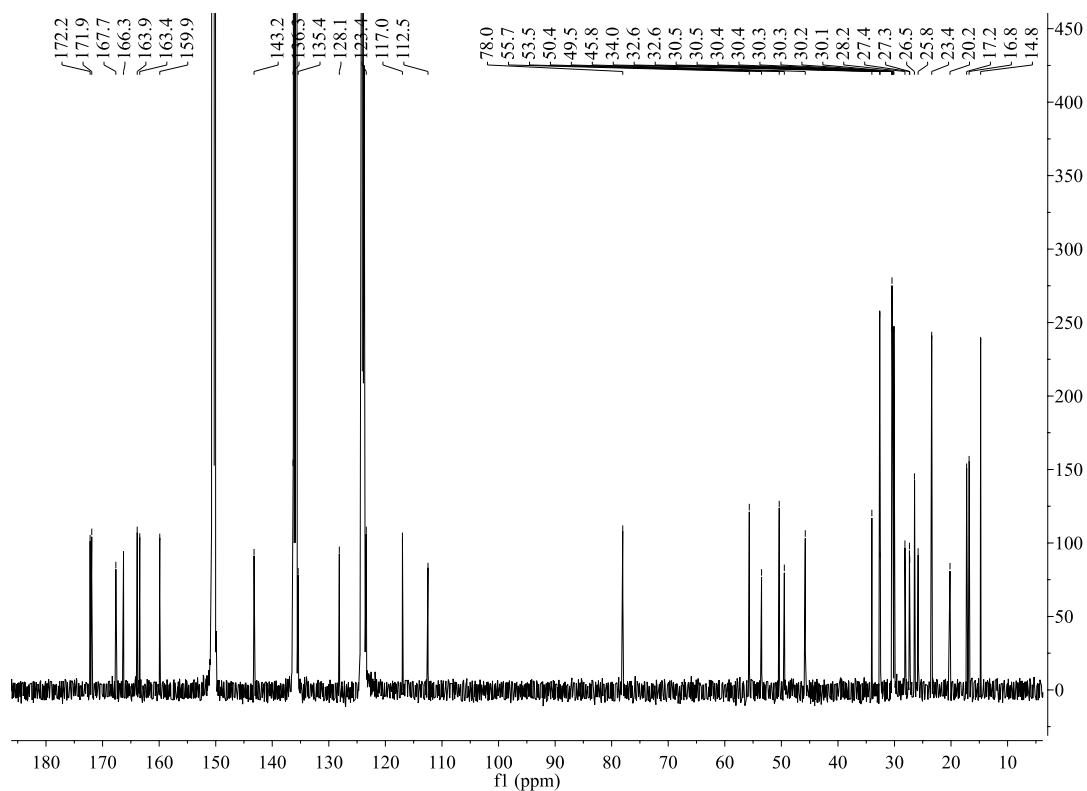

**Fig. S2b**  $^{13}\text{C}$  NMR (125 MHz, Pyridine- $d_5$ ) spectrum of **2a**

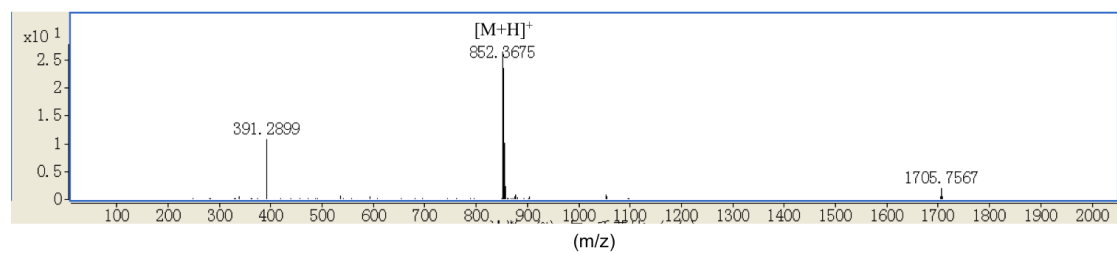

**Fig. S2c** HR-ESI-MS spectrum of **2a**

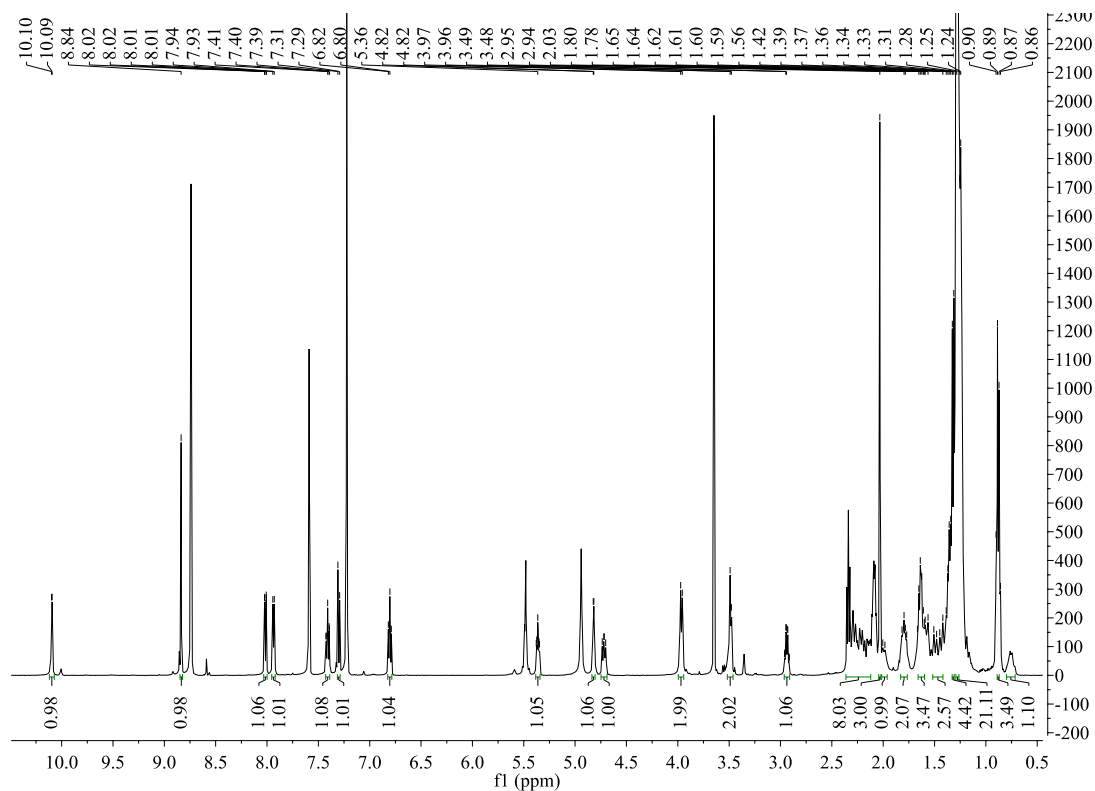

Fig. S3a  $^1\text{H}$  NMR (500 MHz, Pyridine- $d_5$ ) spectrum of **3a**

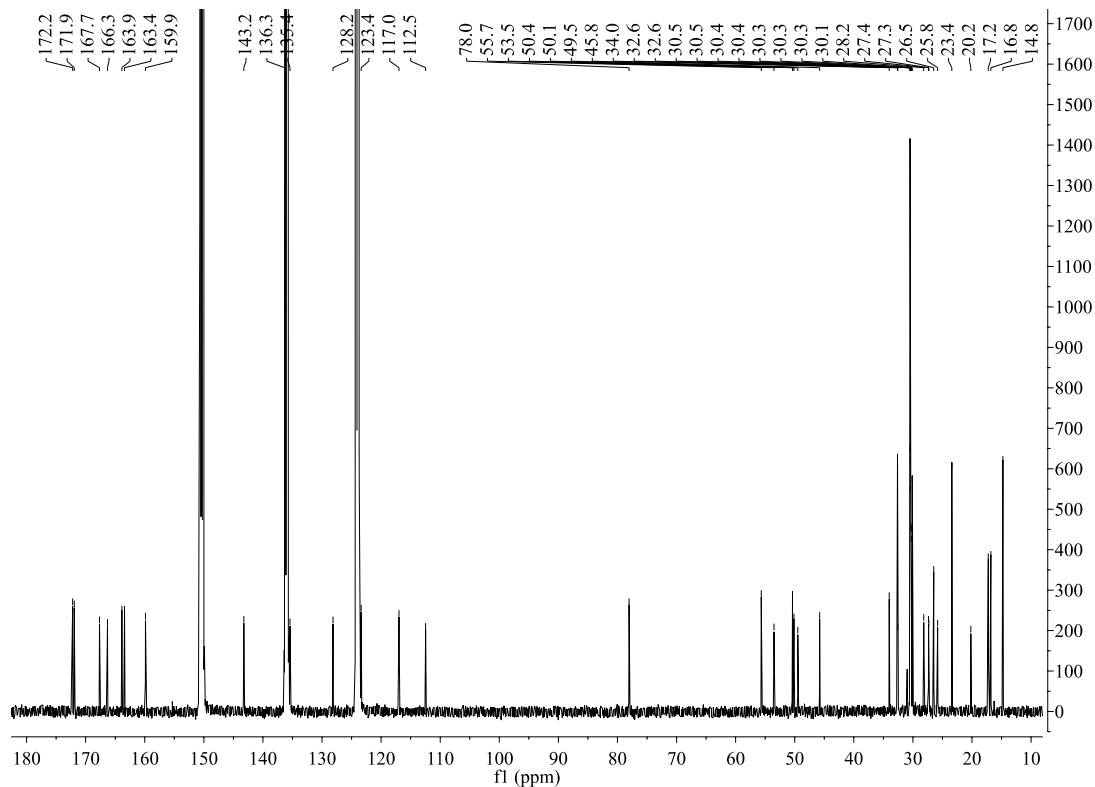

Fig. S3b  $^{13}\text{C}$  NMR (125 MHz, Pyridine- $d_5$ ) spectrum of **3a**

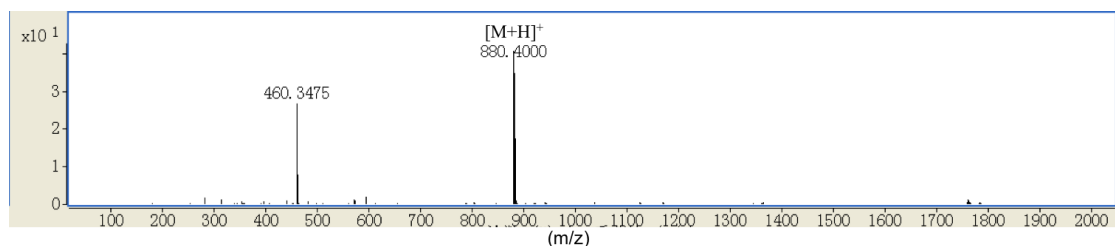

**Fig. S3c** HR-ESI-MS spectrum of **3a**

**Table S4** NMR data ( $^1\text{H}$  NMR 500 MHz,  $^{13}\text{C}$  NMR 125 MHz, Pyridine- $d_5$ ) of **4a**

| Pos. | $\delta_{\text{C}}$ | $\delta_{\text{H}}$ , mult ( $J$ in Hz) | $^1\text{H}$ - $^1\text{H}$ COSY       | HMBC                   |
|------|---------------------|-----------------------------------------|----------------------------------------|------------------------|
| 1    | 112.5               |                                         |                                        |                        |
| 2    | 167.6               |                                         |                                        |                        |
| 3    | 123.4               | 7.30, br d (8.4)                        | 4                                      | 1, 2, 5, 6             |
| 4    | 135.4               | 7.39, dq (1.6, 7.0)                     | 3, 5, 6                                | 1, 2, 3, 5, 6          |
| 5    | 117.0               | 6.79, dq (0.8, 6.8)                     | 4, 6                                   | 1, 2, 3, 4, 6          |
| 6    | 128.1               | 8.01, dd (1.5, 8.0)                     | 4, 5                                   | 2, 3, 4, 7             |
| 7    | 166.3               |                                         |                                        |                        |
| 9    | 143.2               | 8.84, s                                 |                                        | 7, 10, 12              |
| 10   | 136.4               |                                         |                                        |                        |
| 12   | 159.9               |                                         |                                        |                        |
| 13   | NH                  | 10.11, d (3.0)                          | 14                                     | 12, 14, 15, 28         |
| 14   | 55.7                | 4.83, m                                 | 13, 28b                                | 15, 29                 |
| 15   | 171.9               |                                         |                                        |                        |
| 17   | 78.1                | 5.36, m                                 | 18, 35a, 35b                           | 15, 18, 19, 35, 36, 54 |
| 18   | 45.8                | 2.95, m                                 | 17, 54                                 | 19, 54                 |
| 19   | 172.2               |                                         |                                        |                        |
| 20   | NH                  | 7.94, d (6.9)                           | 21                                     | 19, 21, 22             |
| 21   | 50.4                | 4.65, m                                 | 20, 27b                                | 19, 22, 26, 27         |
| 22   | 163.9               |                                         |                                        |                        |
| 24   | 53.5                | 3.45, m                                 | 25a, 25b                               | 22, 25, 26             |
| 25   | 25.9                | 1.32-1.25, m<br>0.74, m                 | 24, 25b, 26a, 26b<br>24, 25a, 26b      | 22, 24                 |
| 26   | 28.2                | 1.69-1.53, m<br>1.52-1.41, m            | 25a, 27a<br>25a, 25b, 27b              |                        |
| 27   | 32.5                | 2.30-2.10, m<br>1.25-1.17, m            | 21, 26a, 27b<br>27a                    |                        |
| 28   | 27.4                | 2.37-2.30, m<br>2.30-2.10, m            | 14, 28b, 29a, 29b<br>14, 28a, 29a, 29b | 15, 30                 |
| 29   | 20.2                | 2.30-2.10, m<br>1.86-1.76, m            | 29b, 30b<br>28a, 28b, 29a              | 14, 30                 |
| 30   | 27.5                | 2.02-1.94, m<br>1.52-1.41, m            | 30b, 31<br>29a, 30a, 31                |                        |
| 31   | 49.3                | 4.00, m                                 | 30a                                    | 29, 30, 33             |
| 33   | 166.8               |                                         |                                        |                        |
| 34   | 23.5                | 2.37-2.30, m                            | 52                                     | 33, 52                 |
| 35   | 34.0                | 2.30-2.10, m                            | 17, 35b, 36                            | 17, 18, 36, 37         |

|    |                        |               |             |                |
|----|------------------------|---------------|-------------|----------------|
|    |                        | 1.86-1.76, m  | 17, 35a, 36 | 17, 18, 36, 37 |
| 36 | 26.5                   | 1.69-1.53, m  | 35a, 35b    | 17, 38         |
| 37 | 30.4-30.1 <sup>a</sup> | 1.25-1.17, m  |             |                |
| 38 | 30.4-30.1 <sup>a</sup> | 1.25-1.17, m  |             |                |
| 39 | 30.4-30.1 <sup>a</sup> | 1.25-1.17, m  |             |                |
| 40 | 30.4-30.1 <sup>a</sup> | 1.25-1.17, m  |             |                |
| 41 | 30.4-30.1 <sup>a</sup> | 1.25-1.17, m  |             |                |
| 42 | 30.4-30.1 <sup>a</sup> | 1.25-1.17, m  |             | 44             |
| 43 | 32.6                   | 1.32-1.25, m  | 37-42, 44   | 41             |
| 44 | 23.4                   | 1.32-1.25, m  | 43, 45      | 43             |
| 45 | 14.8                   | 0.88, t (6.8) | 44          | 43, 44         |
| 52 | 10.1                   | 1.03, t (7.4) | 34          | 33, 34         |
| 54 | 17.2                   | 1.35, d (7.3) | 18          | 17, 18, 19     |

<sup>a</sup> Overlapped each other.

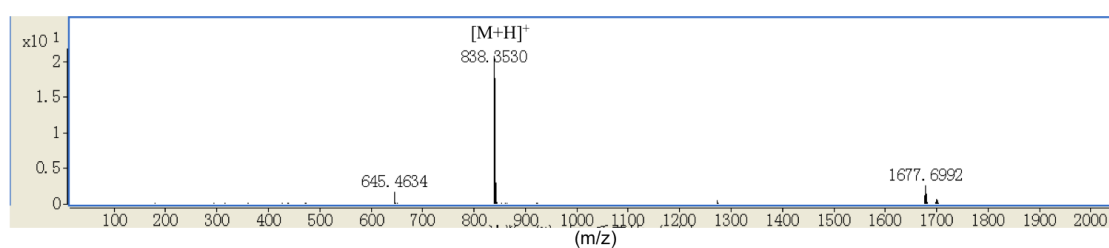

**Fig. S4a** HR-ESI-MS spectrum of **4a**

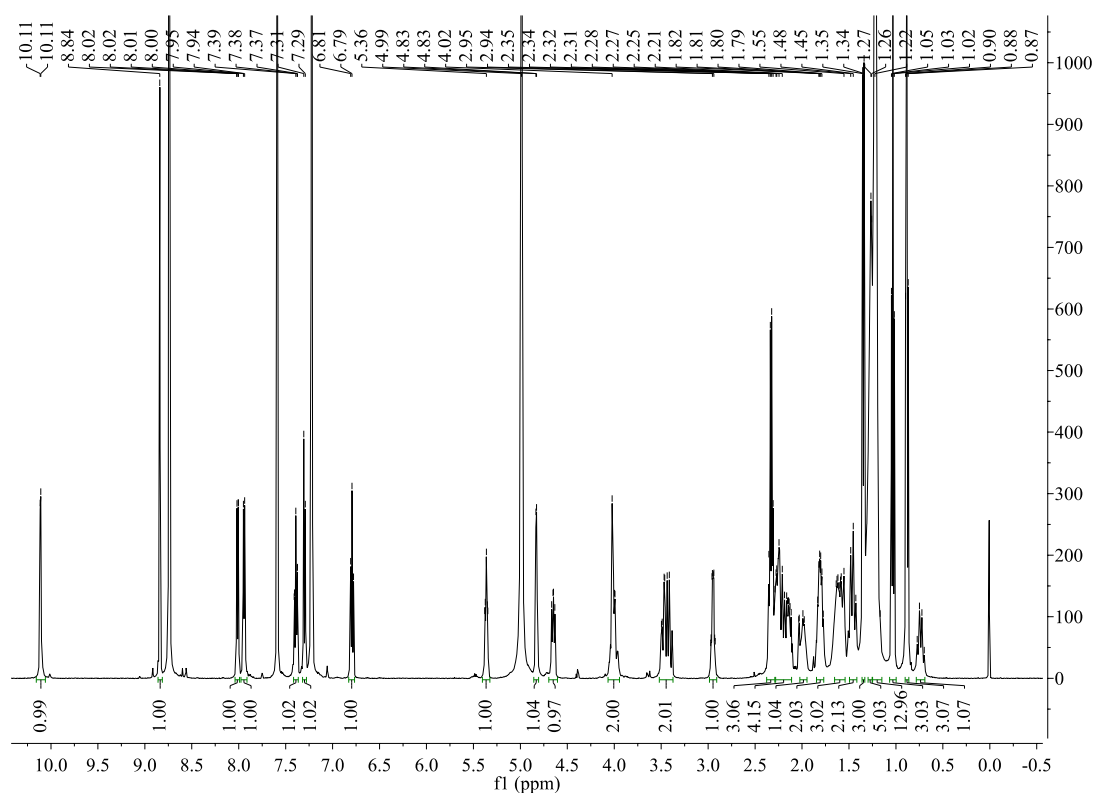

**Fig. S4b** <sup>1</sup>H NMR (500 MHz, Pyridine-*d*<sub>5</sub>) spectrum of **4a**

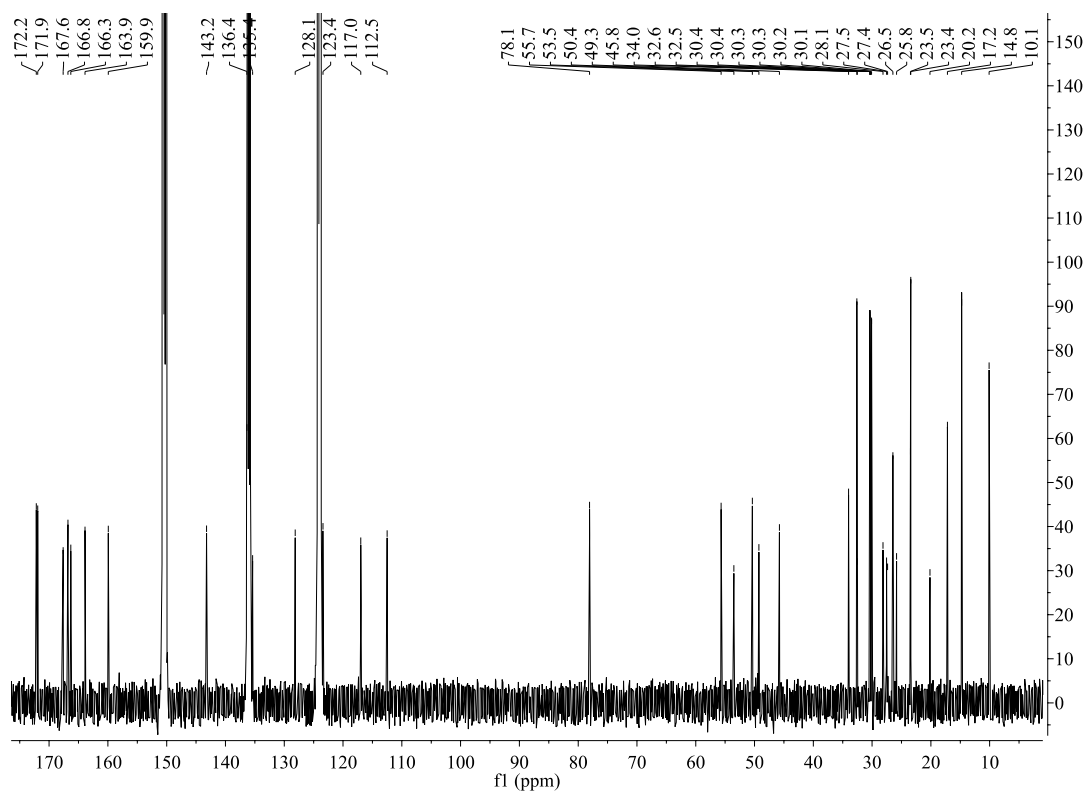

**Fig. S4c**  $^{13}\text{C}$  NMR (125 MHz, Pyridine- $d_5$ ) spectrum of **4a**

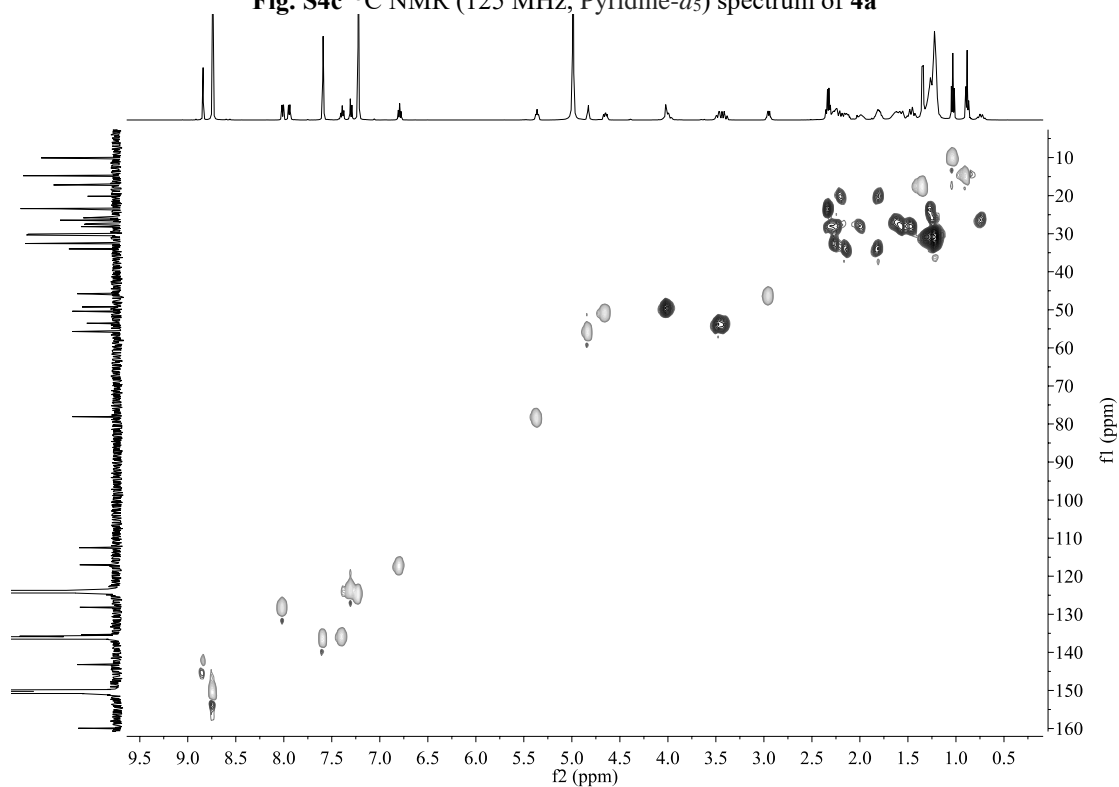

**Fig. S4d** HSQC (500 MHz/125 MHz, Pyridine- $d_5$ ) spectrum of **4a**

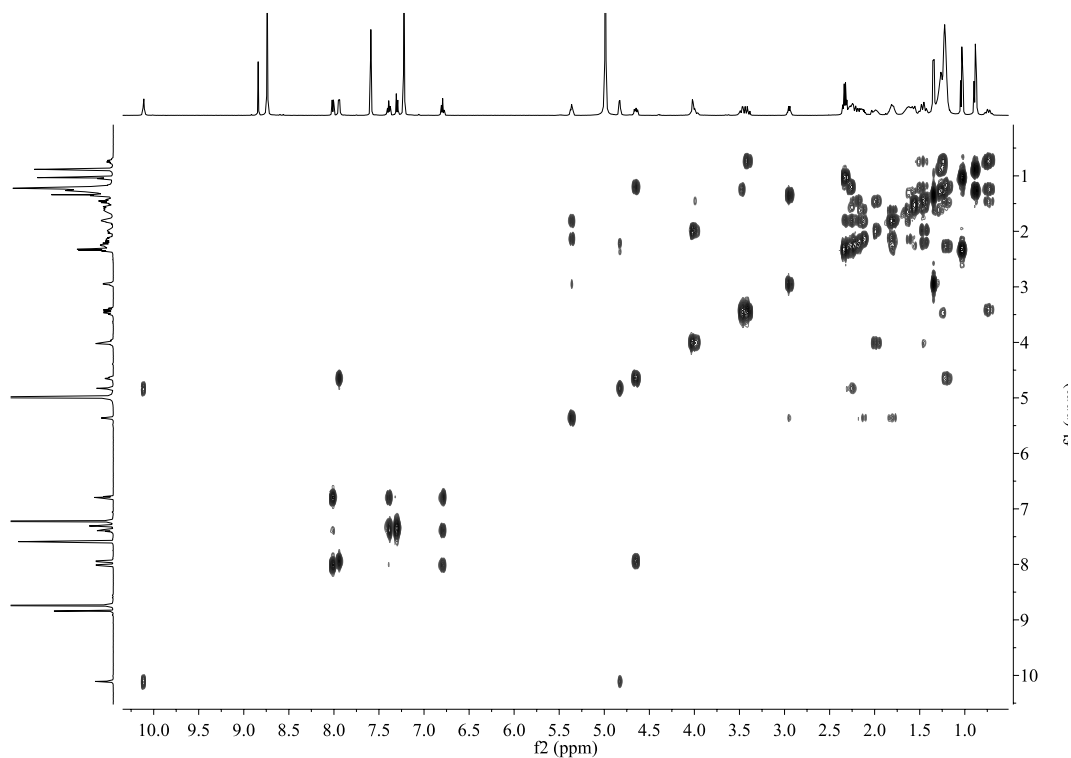

Fig. S4e  $^1\text{H}$ - $^1\text{H}$  COSY (500 MHz, Pyridine- $d_5$ ) spectrum of **4a**

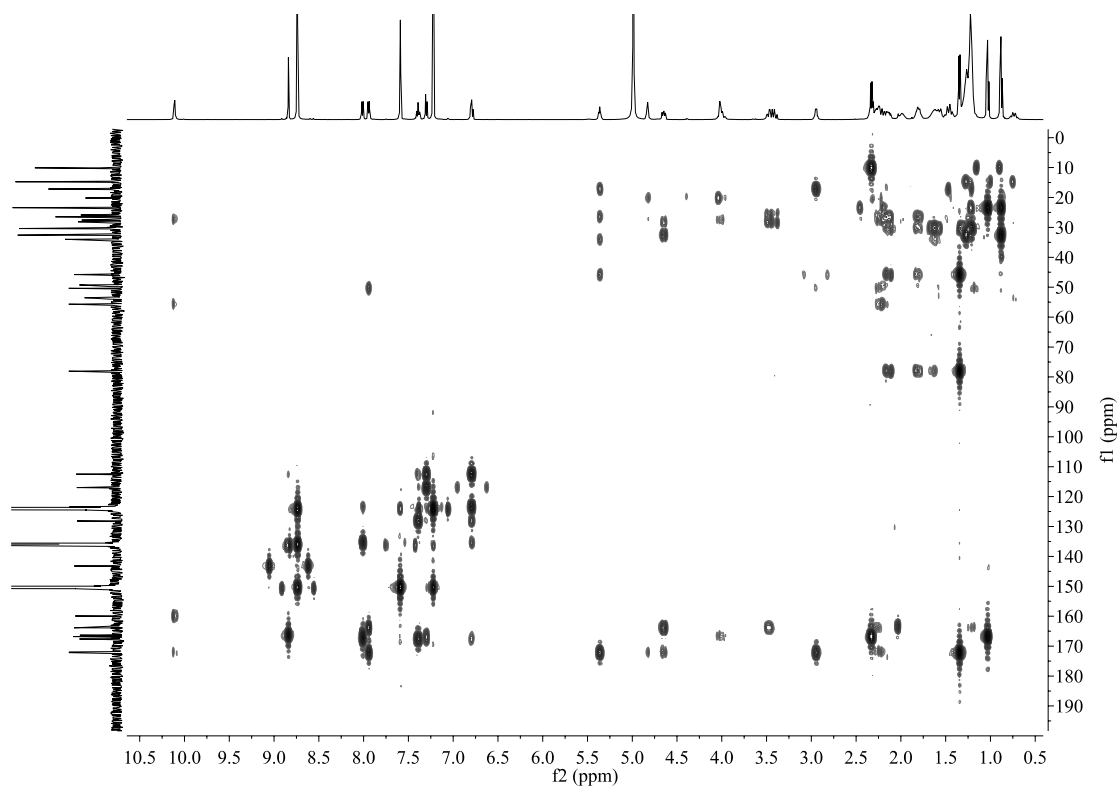

Fig. S4f HMBC (500 MHz/125 MHz, Pyridine- $d_5$ ) spectrum of **4a**

Table S5 NMR data ( $^1\text{H}$  NMR 500 MHz,  $^{13}\text{C}$  NMR 125 MHz, Pyridine- $d_5$ ) of **5a**

| Pos. | $\delta_{\text{C}}$ | $\delta_{\text{H}}$ , mult ( $J$ in Hz) | $^1\text{H}$ - $^1\text{H}$ COSY | HMBC |
|------|---------------------|-----------------------------------------|----------------------------------|------|
| 1    | 112.5               |                                         |                                  |      |

|    |                        |                     |                   |                    |
|----|------------------------|---------------------|-------------------|--------------------|
| 2  | 167.6                  |                     |                   |                    |
| 3  | 123.4                  | 7.31, br d (8.2)    | 4                 | 1, 2, 5, 6         |
| 4  | 135.4                  | 7.40, dq (1.7, 7.1) | 3, 5, 6           | 1, 2, 3, 5, 6      |
| 5  | 117.0                  | 6.79, dq (0.8, 7.4) | 4, 6              | 1, 2, 3, 4, 6      |
| 6  | 128.2                  | 8.01, dd (1.5, 8.0) | 4, 5              | 2, 3, 4            |
| 7  | 166.3                  |                     |                   |                    |
| 9  | 143.2                  | 8.84, s             |                   | 7, 10              |
| 10 | 136.4                  |                     |                   |                    |
| 12 | 160.0                  |                     |                   |                    |
| 13 | NH                     | 10.10, d (3.1)      | 14                | 12, 14, 15, 28     |
| 14 | 55.7                   | 4.83, m             | 13, 28b           | 15, 29             |
| 15 | 171.9                  |                     |                   |                    |
| 17 | 78.1                   | 5.37, m             | 18, 35a, 35b      | 18, 19, 35, 36, 54 |
| 18 | 45.7                   | 2.96, m             | 17, 54            | 19, 54             |
| 19 | 172.2                  |                     |                   |                    |
| 20 | NH                     | 7.97, d (7.0)       | 21                | 19, 21, 22         |
| 21 | 50.4                   | 4.73, m             | 20, 27b           | 19, 22, 26, 27     |
| 22 | 163.9                  |                     |                   |                    |
| 24 | 53.5                   | 3.45, m             | 25a, 25b          | 22, 25, 26         |
| 25 | 25.8                   | 1.32-1.25, m        | 24, 25b, 26a, 26b | 22, 24             |
|    |                        | 0.73, m             | 24, 25a, 26b      |                    |
| 26 | 28.2                   | 1.66-1.56, m        | 25a, 27a          |                    |
|    |                        | 1.50-1.43, m        | 25a, 25b, 27b     |                    |
| 27 | 32.5                   | 2.39-2.10, m        | 21, 26a, 27b      |                    |
|    |                        | 1.25-1.17, m        | 27a               |                    |
| 28 | 27.5                   | 2.39-2.10, m        | 14, 28b, 29a, 29b | 15, 30             |
| 29 | 20.2                   | 2.39-2.10, m        | 29b, 30b          | 14, 30             |
|    |                        | 1.85-1.77, m        | 28a, 28b, 29a     |                    |
| 30 | 27.8                   | 2.02-1.95, m        | 30b, 31           |                    |
|    |                        | 1.50-1.43, m        | 29a, 30a, 31      |                    |
| 31 | 49.5                   | 4.09, m             | 30a               | 29, 30, 33         |
| 33 | 166.8                  |                     |                   |                    |
| 34 | 31.5                   | 2.39-2.10, m        | 52                | 33, 52             |
| 35 | 34.0                   | 2.39-2.10, m        | 17, 35b, 36       | 17, 18, 36, 37     |
|    |                        | 1.85-1.77, m        | 17, 35a, 36       | 17, 18, 36, 37     |
| 36 | 26.5                   | 1.66-1.56, m        | 35a, 35b          | 17, 38             |
| 37 | 30.4-30.1 <sup>a</sup> | 1.25-1.17, m        |                   |                    |
| 38 | 30.4-30.1 <sup>a</sup> | 1.25-1.17, m        |                   |                    |
| 39 | 30.4-30.1 <sup>a</sup> | 1.25-1.17, m        |                   |                    |
| 40 | 30.4-30.1 <sup>a</sup> | 1.25-1.17, m        |                   |                    |
| 41 | 30.4-30.1 <sup>a</sup> | 1.25-1.17, m        |                   |                    |
| 42 | 30.4-30.1 <sup>a</sup> | 1.25-1.17, m        |                   | 44                 |
| 43 | 32.6                   | 1.32-1.25, m        | 37-42, 44         | 41                 |
| 44 | 23.4                   | 1.32-1.25, m        | 43, 45            | 43                 |
| 45 | 14.8                   | 0.88, t (6.8)       | 44                | 43, 44             |
| 52 | 19.4                   | 1.66-1.56, m        | 34, 53            | 33, 34, 53         |



|    |      |               |    |            |
|----|------|---------------|----|------------|
| 53 | 13.8 | 0.79, t (7.3) | 52 | 34, 52     |
| 54 | 17.1 | 1.37, d (7.3) | 18 | 17, 18, 19 |

<sup>a</sup> Overlapped each other.

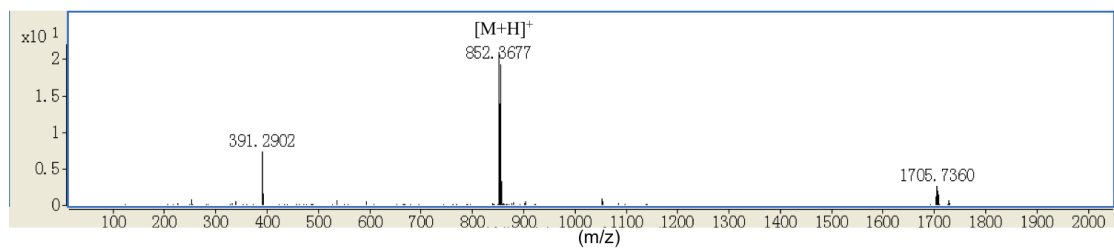

**Fig. S5a** HR-ESI-MS spectrum of **5a**

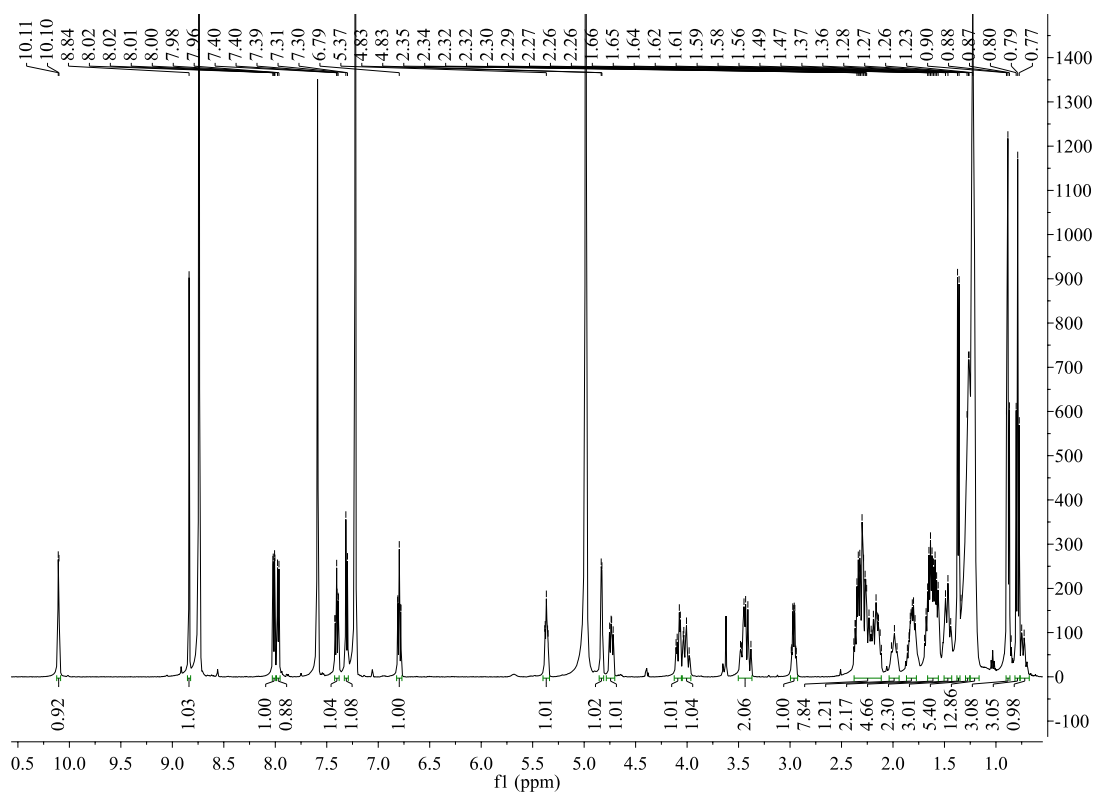

**Fig. S5b** <sup>1</sup>H NMR (500 MHz, Pyridine-*d*<sub>5</sub>) spectrum of **5a**

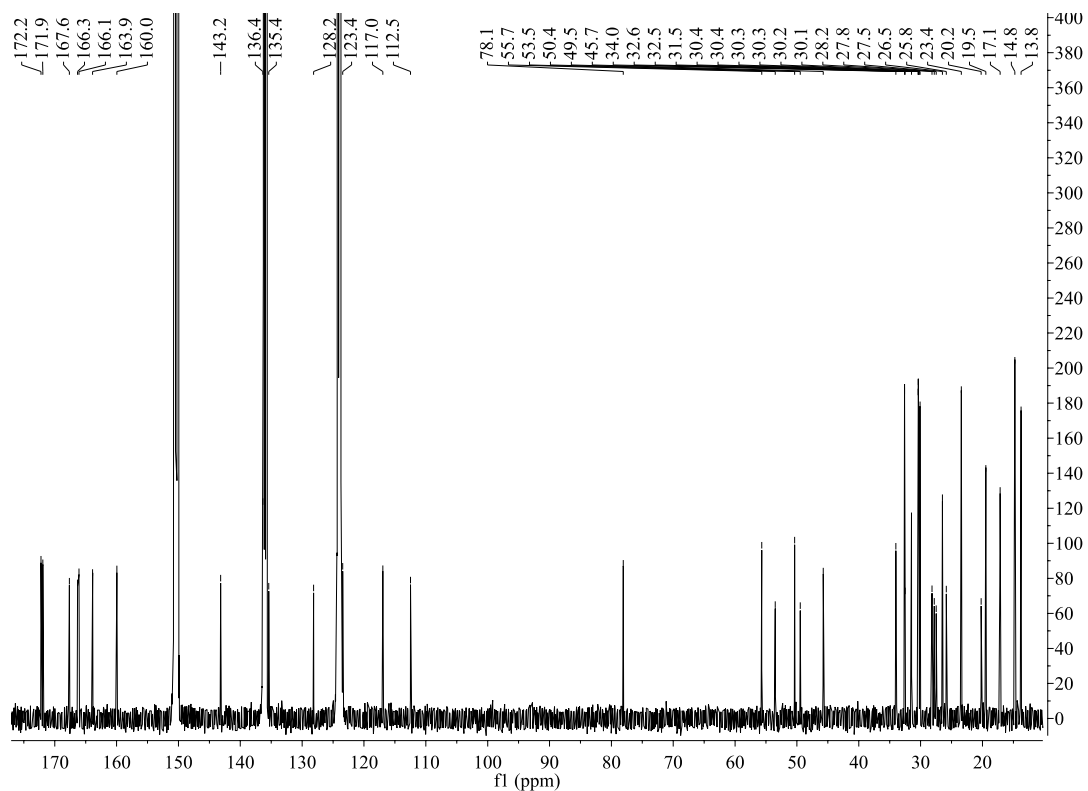

**Fig. S5c**  $^{13}\text{C}$  NMR (125 MHz, Pyridine- $d_5$ ) spectrum of **5a**

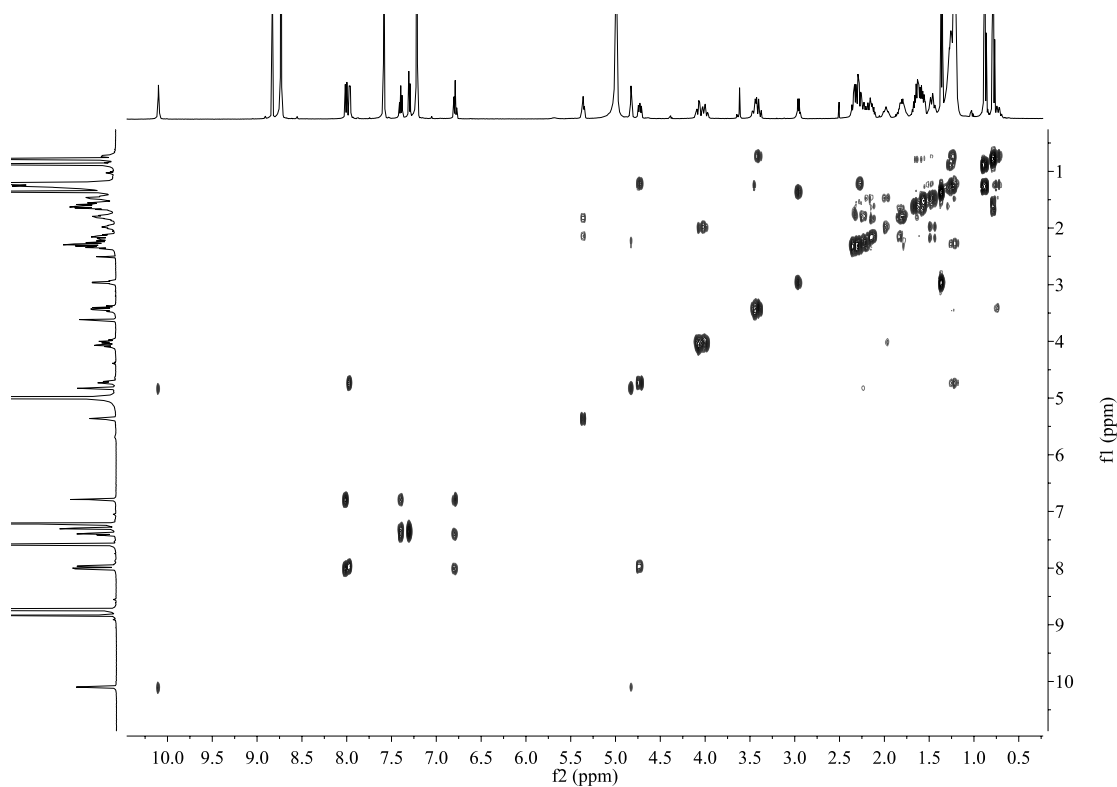

**Fig. S5d**  $^1\text{H}$ - $^1\text{H}$  COSY (500 MHz, Pyridine- $d_5$ ) spectrum of **5a**

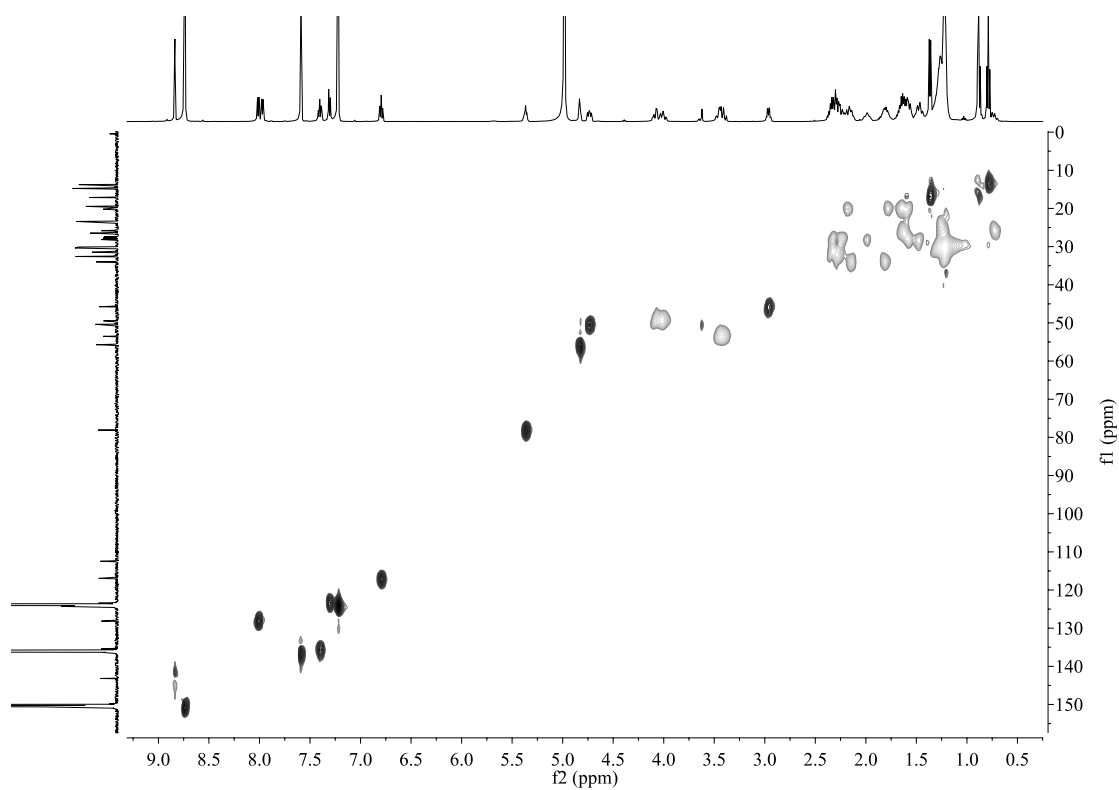

Fig. S5e HSQC (500 MHz/125 MHz, Pyridine-*d*<sub>5</sub>) spectrum of **5a**

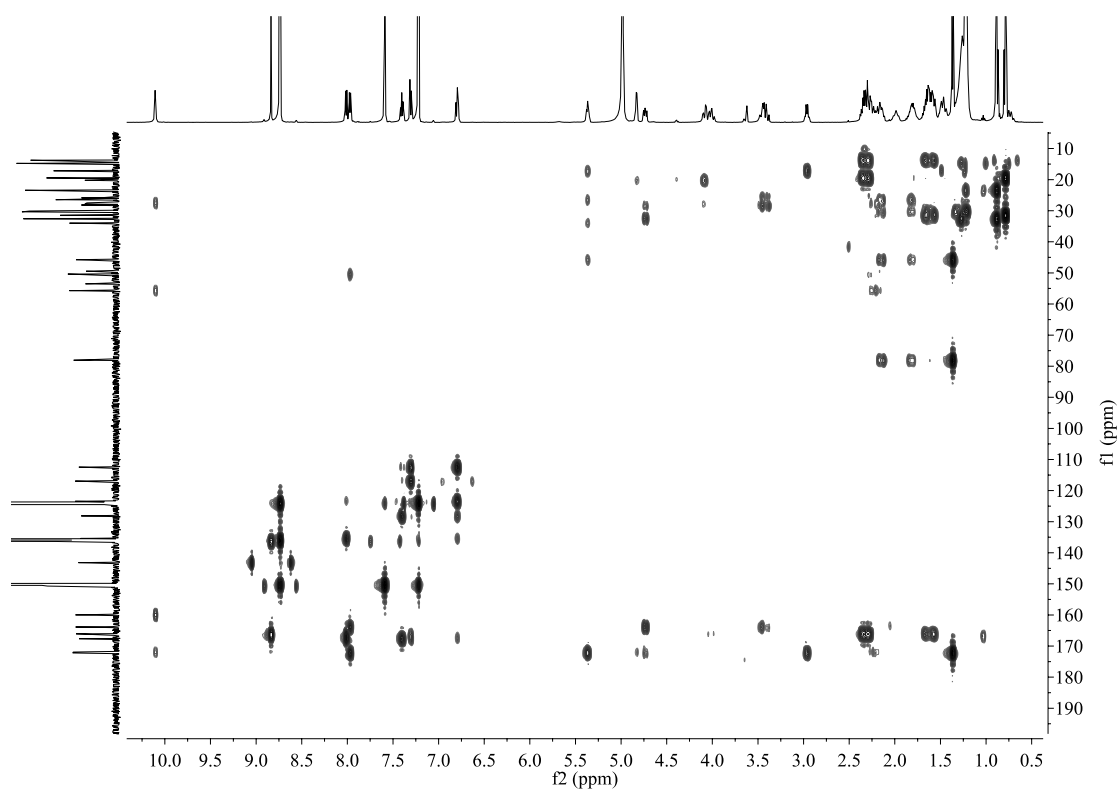

Fig. S5f HMBC (500 MHz/125 MHz, Pyridine-*d*<sub>5</sub>) spectrum of **5a**

Table S6 NMR data (<sup>1</sup>H NMR 500 MHz, <sup>13</sup>C NMR 125 MHz, Pyridine-*d*<sub>5</sub>) of **6a**

| Pos. | $\delta_C$ | $\delta_H$ , mult ( <i>J</i> in Hz) | <sup>1</sup> H- <sup>1</sup> H COSY | HMBC |
|------|------------|-------------------------------------|-------------------------------------|------|
| 1    | 112.5      |                                     |                                     |      |
| 2    | 167.6      |                                     |                                     |      |

|    |                        |                     |                   |                    |
|----|------------------------|---------------------|-------------------|--------------------|
| 3  | 123.4                  | 7.30, br d (8.4)    | 4                 | 1, 2, 5, 6         |
| 4  | 135.4                  | 7.39, dq (1.6, 7.0) | 3, 5, 6           | 1, 2, 3, 5, 6      |
| 5  | 117.0                  | 6.79, dq (0.8, 6.8) | 4, 6              | 1, 2, 3, 4, 6      |
| 6  | 128.1                  | 8.01, dd (1.5, 8.0) | 4, 5              | 2, 3, 4            |
| 7  | 166.3                  |                     |                   |                    |
| 9  | 143.2                  | 8.84, s             |                   | 7, 10              |
| 10 | 136.4                  |                     |                   |                    |
| 12 | 159.9                  |                     |                   |                    |
| 13 | NH                     | 10.11, d (3.0)      | 14                | 12, 14, 15, 28     |
| 14 | 55.7                   | 4.83, m             | 13, 28b           | 15, 29             |
| 15 | 171.9                  |                     |                   |                    |
| 17 | 78.1                   | 5.36, m             | 18, 35a, 35b      | 18, 19, 35, 36, 54 |
| 18 | 45.8                   | 2.95, m             | 17, 54            | 19, 54             |
| 19 | 172.2                  |                     |                   |                    |
| 20 | NH                     | 7.94, d (6.9)       | 21                | 19, 21, 22         |
| 21 | 50.4                   | 4.65, m             | 20, 27b           | 19, 22, 26, 27     |
| 22 | 163.9                  |                     |                   |                    |
| 24 | 53.5                   | 3.45, m             | 25a, 25b          | 22, 25, 26         |
| 25 | 25.9                   | 1.30-1.21, m        | 24, 25b, 26a, 26b | 22, 24             |
|    |                        | 0.74, m             | 24, 25a, 26b      |                    |
| 26 | 28.2                   | 1.69-1.53, m        | 25a, 27a          |                    |
|    |                        | 1.52-1.41, m        | 25a, 25b, 27b     |                    |
| 27 | 32.5                   | 2.30-2.10, m        | 21, 26a, 27b      |                    |
|    |                        | 1.30-1.21, m        | 27a               |                    |
| 28 | 27.4                   | 2.37-2.30, m        | 14, 28b, 29a, 29b |                    |
|    |                        | 2.30-2.10, m        | 14, 28a, 29a, 29b | 15, 30             |
| 29 | 20.2                   | 2.30-2.10, m        | 29b, 30b          | 14, 30             |
|    |                        | 1.86-1.76, m        | 28a, 28b, 29a     |                    |
| 30 | 27.5                   | 2.02-1.94, m        | 30b, 31           |                    |
|    |                        | 1.52-1.41, m        | 29a, 30a, 31      |                    |
| 31 | 49.3                   | 4.00, m             | 30a               | 29, 30, 33         |
| 33 | 166.8                  |                     |                   |                    |
| 34 | 23.5                   | 2.37-2.30, m        | 52                | 33, 52             |
| 35 | 34.0                   | 2.30-2.10, m        | 17, 35b, 36       | 17, 18, 36, 37     |
|    |                        | 1.86-1.76, m        | 17, 35a, 36       | 17, 18, 36, 37     |
| 36 | 26.5                   | 1.69-1.53, m        | 35a, 35b          | 17, 38             |
| 37 | 30.5-30.1 <sup>a</sup> | 1.30-1.21, m        |                   |                    |
| 38 | 30.5-30.1 <sup>a</sup> | 1.30-1.21, m        |                   |                    |
| 39 | 30.5-30.1 <sup>a</sup> | 1.30-1.21, m        |                   |                    |
| 40 | 30.5-30.1 <sup>a</sup> | 1.30-1.21, m        |                   |                    |
| 41 | 30.5-30.1 <sup>a</sup> | 1.30-1.21, m        |                   |                    |
| 42 | 30.5-30.1 <sup>a</sup> | 1.30-1.21, m        |                   |                    |
| 43 | 30.5-30.1 <sup>a</sup> | 1.30-1.21, m        |                   |                    |
| 44 | 30.5-30.1 <sup>a</sup> | 1.30-1.21, m        |                   | 46                 |
| 45 | 32.6                   | 1.30-1.21, m        | 37-44, 46         | 43                 |
| 46 | 23.4                   | 1.30-1.21, m        | 45, 47            | 45                 |

|    |      |               |    |            |
|----|------|---------------|----|------------|
| 47 | 14.8 | 0.88, t (6.8) | 46 | 45, 46     |
| 52 | 10.1 | 1.03, t (7.4) | 34 | 33, 34     |
| 54 | 17.2 | 1.35, d (7.3) | 18 | 17, 18, 19 |

<sup>a</sup> Overlapped each other.

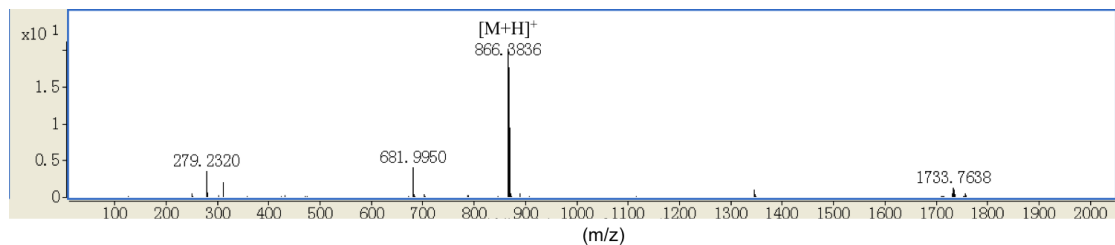

**Fig. S6a** HR-ESI-MS spectrum of **6a**

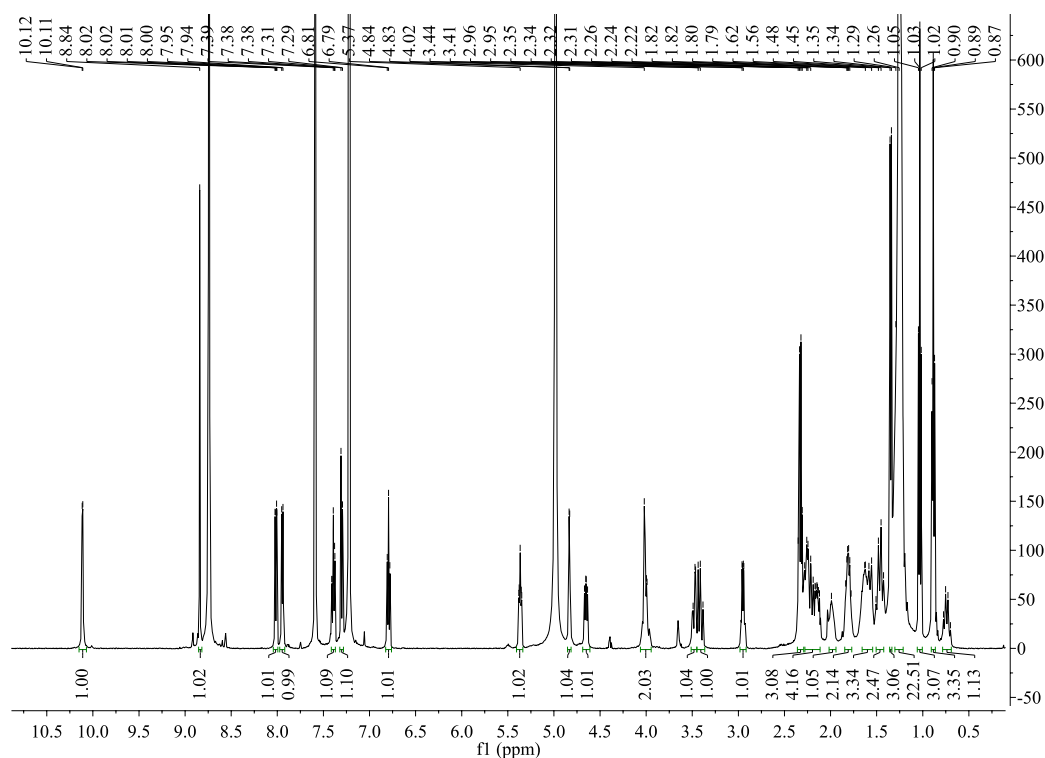

**Fig. S6b** <sup>1</sup>H NMR (500 MHz, Pyridine-*d*<sub>5</sub>) spectrum of **6a**

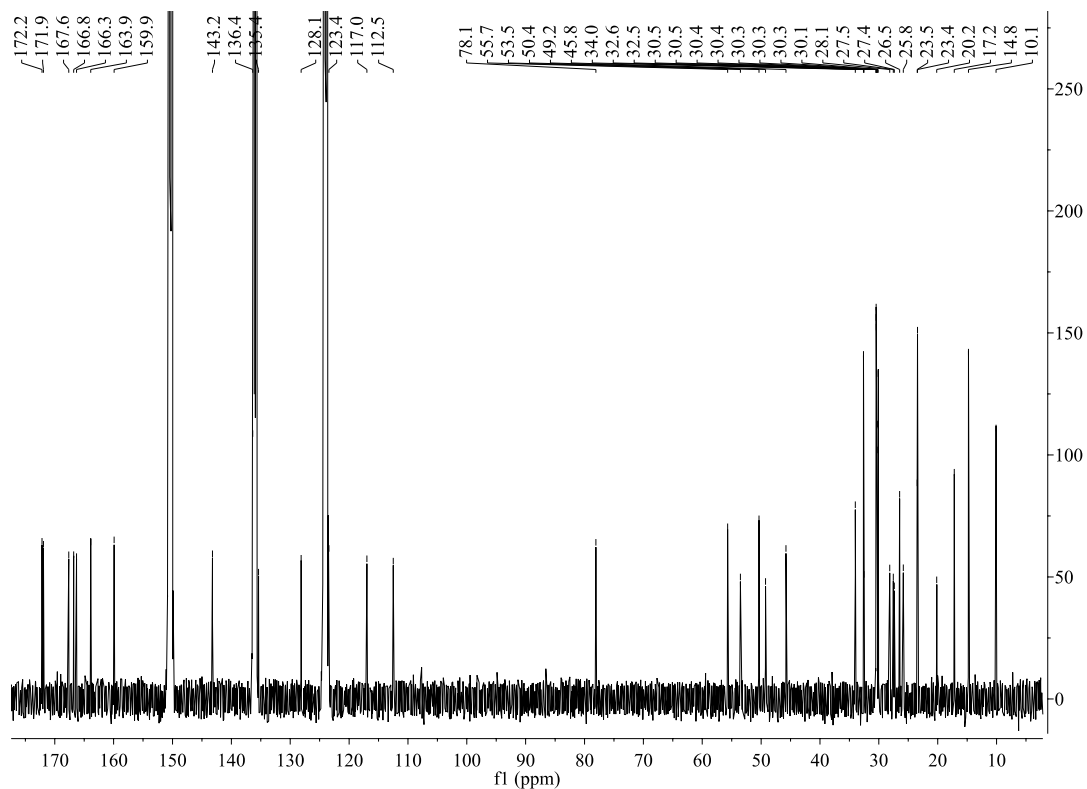

Fig. S6c  $^{13}\text{C}$  NMR (125 MHz, Pyridine- $d_5$ ) spectrum of **6a**

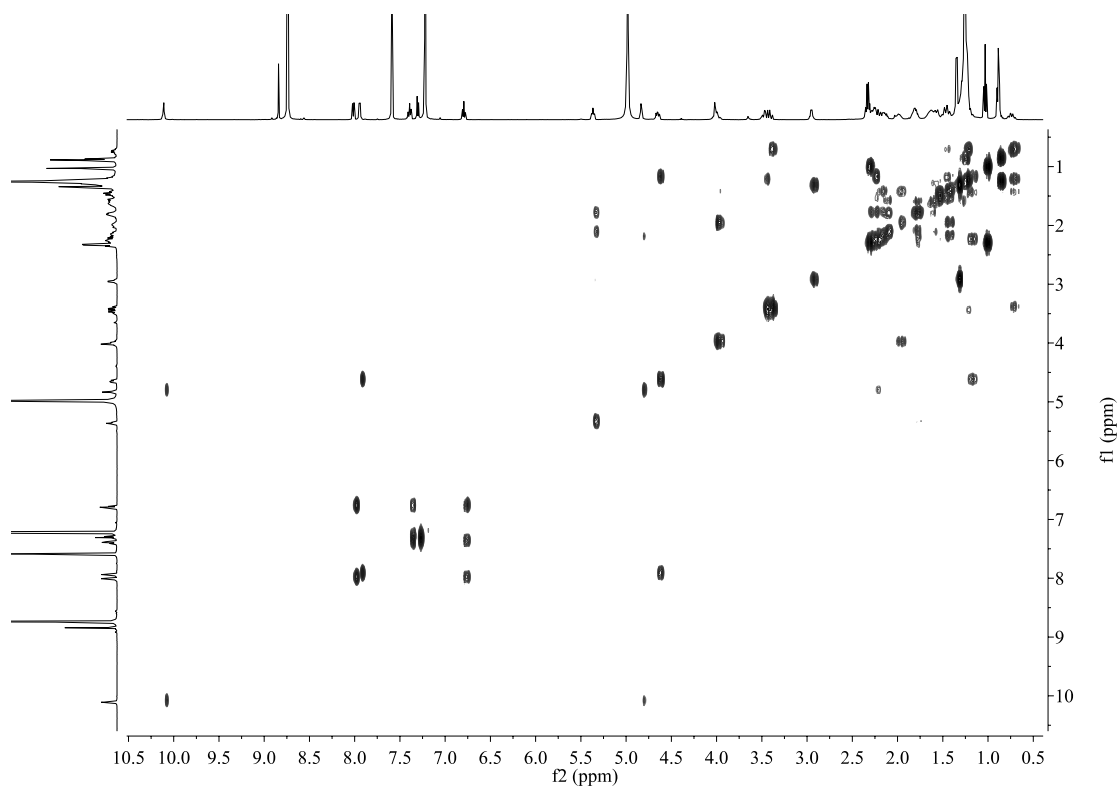

Fig. S6d  $^1\text{H}$ - $^1\text{H}$  COSY (500 MHz, Pyridine- $d_5$ ) spectrum of **6a**

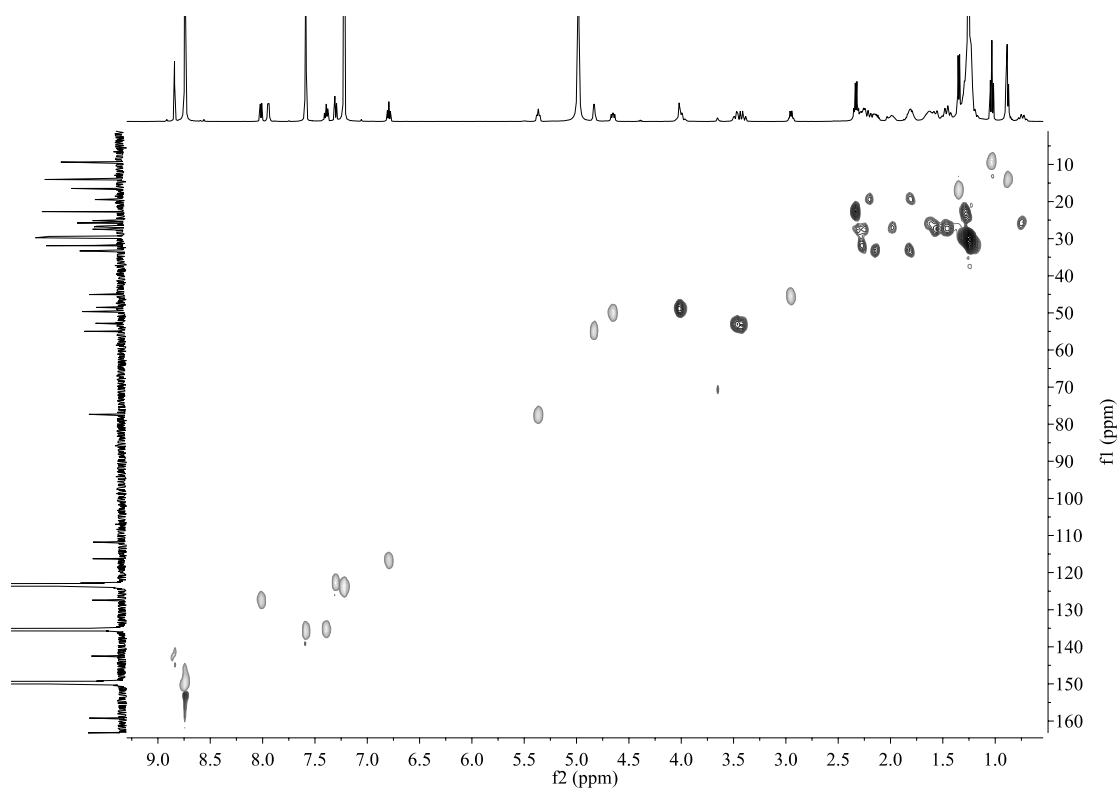

**Fig. S6e** HSQC (500 MHz/125 MHz, Pyridine- $d_5$ ) spectrum of **6a**

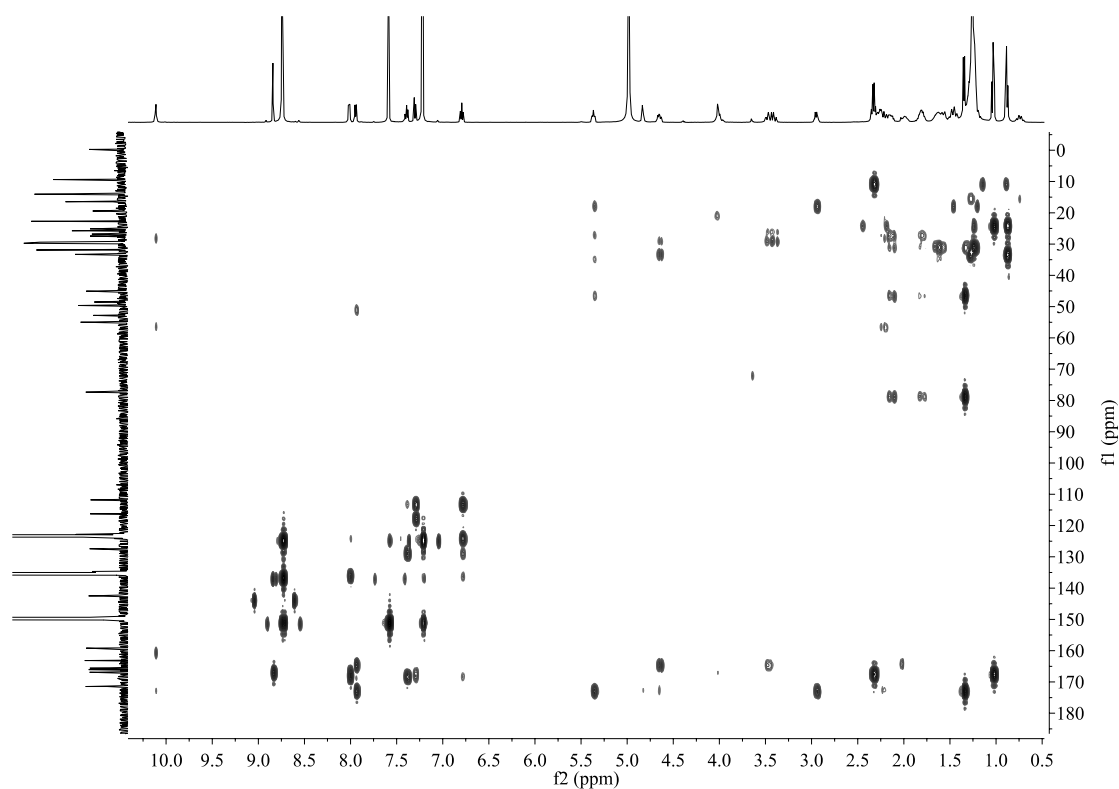

**Fig. S6f** HMBC (500 MHz/125 MHz, Pyridine- $d_5$ ) spectrum of **6a**

**Table S7** NMR data ( $^1\text{H}$  NMR 500 MHz,  $^{13}\text{C}$  NMR 125 MHz, Pyridine- $d_5$ ) of compound **7a**

| Pos. | $\delta_{\text{C}}$ | $\delta_{\text{H}}$ , mult ( $J$ in Hz) | COSY | HMBC |
|------|---------------------|-----------------------------------------|------|------|
| 1    | 112.5               |                                         |      |      |
| 2    | 167.6               |                                         |      |      |

|    |                        |                     |                   |                    |
|----|------------------------|---------------------|-------------------|--------------------|
| 3  | 123.4                  | 7.31, br d (8.2)    | 4                 | 1, 2, 5, 6         |
| 4  | 135.4                  | 7.40, dq (1.7, 7.1) | 3, 5, 6           | 1, 2, 3, 5, 6      |
| 5  | 117.0                  | 6.79, dq (0.8, 7.4) | 4, 6              | 1, 2, 3, 4, 6      |
| 6  | 128.2                  | 8.01, dd (1.5, 8.0) | 4, 5              | 2, 3, 4            |
| 7  | 166.3                  |                     |                   |                    |
| 9  | 143.2                  | 8.84, s             |                   | 7, 10              |
| 10 | 136.4                  |                     |                   |                    |
| 12 | 160.0                  |                     |                   |                    |
| 13 | NH                     | 10.10, d (3.1)      | 14                | 12, 14, 15, 28     |
| 14 | 55.7                   | 4.83, m             | 13, 28b           | 15, 29             |
| 15 | 171.9                  |                     |                   |                    |
| 17 | 78.1                   | 5.37, m             | 18, 35a, 35b      | 18, 19, 35, 36, 54 |
| 18 | 45.7                   | 2.96, m             | 17, 54            | 19, 54             |
| 19 | 172.2                  |                     |                   |                    |
| 20 | NH                     | 7.97, d (7.0)       | 21                | 19, 21, 22         |
| 21 | 50.4                   | 4.73, m             | 20, 27b           | 19, 22, 26, 27     |
| 22 | 163.9                  |                     |                   |                    |
| 24 | 53.5                   | 3.45, m             | 25a, 25b          | 22, 25, 26         |
| 25 | 25.8                   | 1.29-1.21, m        | 24, 25b, 26a, 26b | 22, 24             |
|    |                        | 0.73, m             | 24, 25a, 26b      |                    |
| 26 | 28.2                   | 1.66-1.56, m        | 25a, 27a          |                    |
|    |                        | 1.50-1.43, m        | 25a, 25b, 27b     |                    |
| 27 | 32.5                   | 2.39-2.10, m        | 21, 26a, 27b      |                    |
|    |                        | 1.29-1.21, m        | 27a               |                    |
| 28 | 27.5                   | 2.39-2.10, m        | 14, 28b, 29a, 29b | 15, 30             |
| 29 | 20.2                   | 2.39-2.10, m        | 29b, 30b          | 14, 30             |
|    |                        | 1.85-1.77, m        | 28a, 28b, 29a     |                    |
| 30 | 27.8                   | 2.02-1.95, m        | 30b, 31           |                    |
|    |                        | 1.50-1.43, m        | 29a, 30a, 31      |                    |
| 31 | 49.5                   | 4.09, m             | 30a               | 29, 30, 33         |
| 33 | 166.8                  |                     |                   |                    |
| 34 | 31.5                   | 2.39-2.10, m        | 52                | 33, 52, 53         |
| 35 | 34.0                   | 2.39-2.10, m        | 17, 35b, 36       | 17, 18, 36, 37     |
|    |                        | 1.85-1.77, m        | 17, 35a, 36       | 17, 18, 36, 37     |
| 36 | 26.5                   | 1.66-1.56, m        | 35a, 35b          | 17, 38             |
| 37 | 30.5-30.1 <sup>a</sup> | 1.29-1.21, m        |                   |                    |
| 38 | 30.5-30.1 <sup>a</sup> | 1.29-1.21, m        |                   |                    |
| 39 | 30.5-30.1 <sup>a</sup> | 1.29-1.21, m        |                   |                    |
| 40 | 30.5-30.1 <sup>a</sup> | 1.29-1.21, m        |                   |                    |
| 41 | 30.5-30.1 <sup>a</sup> | 1.29-1.21, m        |                   |                    |
| 42 | 30.5-30.1 <sup>a</sup> | 1.29-1.21, m        |                   |                    |
| 43 | 30.5-30.1 <sup>a</sup> | 1.29-1.21, m        |                   |                    |
| 44 | 30.5-30.1 <sup>a</sup> | 1.29-1.21, m        |                   | 46                 |
| 45 | 32.6                   | 1.29-1.21, m        | 37-44, 46         | 43                 |
| 46 | 23.4                   | 1.29-1.21, m        | 45, 47            | 45                 |
| 47 | 14.8                   | 0.88, t (6.8)       | 46                | 45, 46             |



|    |      |               |        |            |
|----|------|---------------|--------|------------|
| 52 | 19.4 | 1.66-1.56, m  | 34, 53 | 33, 34, 53 |
| 53 | 13.8 | 0.79, t (7.3) | 52     | 34, 52     |
| 54 | 17.1 | 1.37, d (7.3) | 18     | 17, 18, 19 |

<sup>a</sup> Overlapped each other.

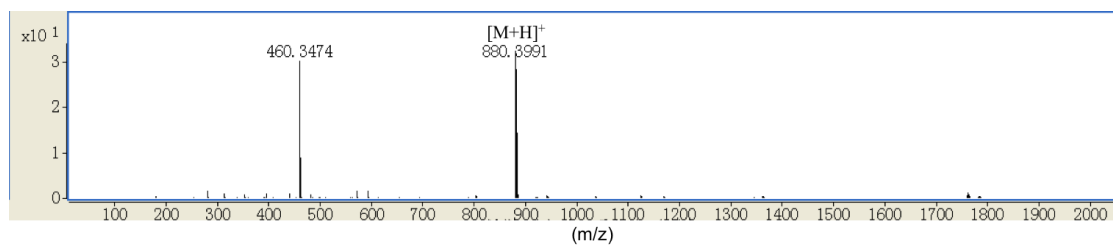

**Fig. S7a** HR-ESI-MS spectrum of **7a**

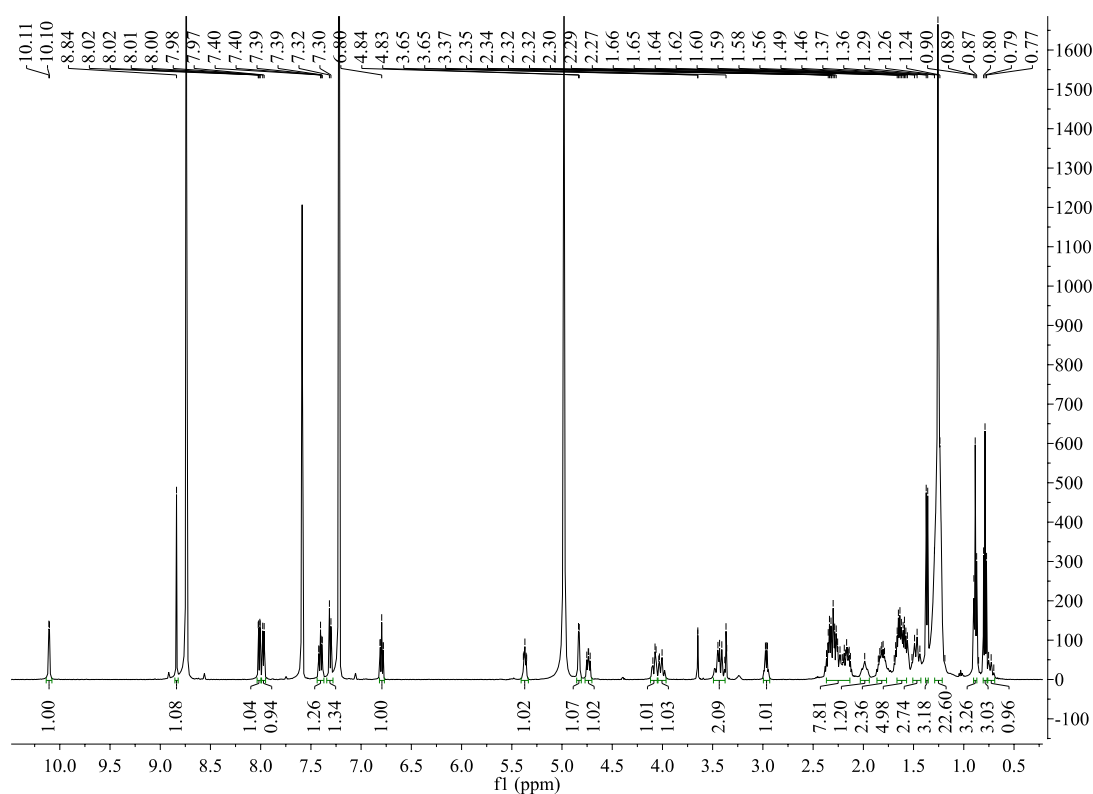

**Fig. S7b** <sup>1</sup>H NMR (500 MHz, Pyridine-*d*<sub>5</sub>) spectrum of **7a**

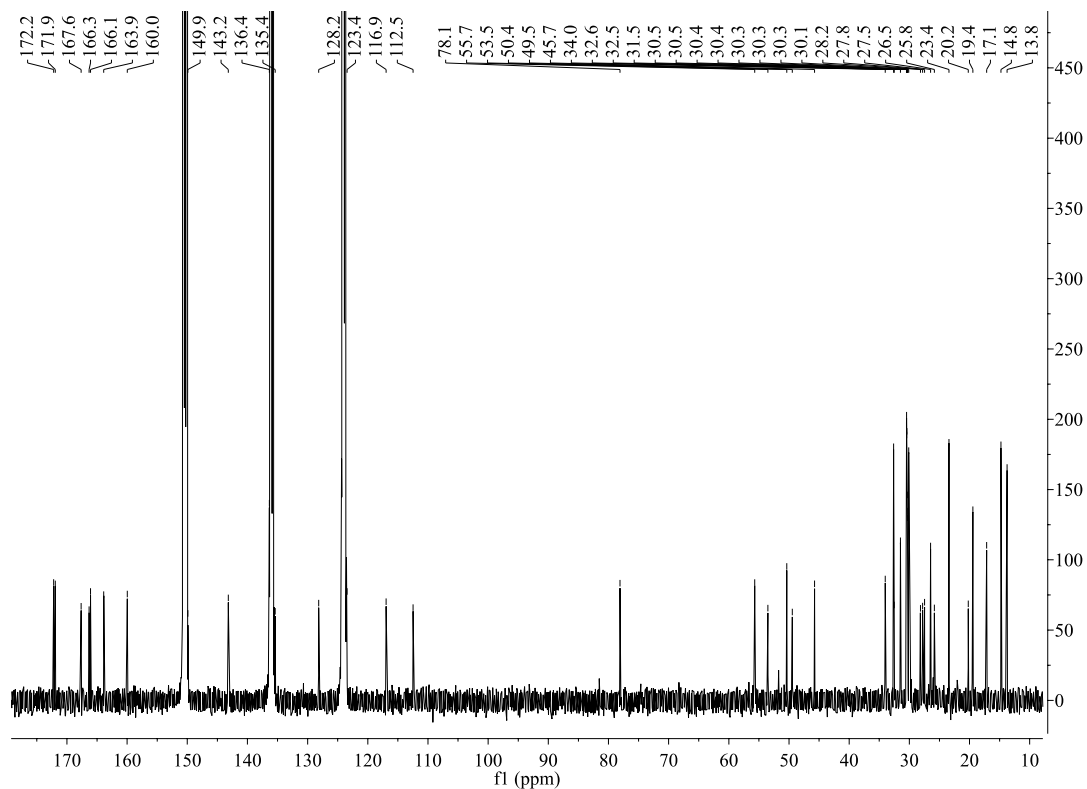

Fig. S7c  $^{13}\text{C}$  NMR (125 MHz, Pyridine- $d_5$ ) spectrum of **7a**

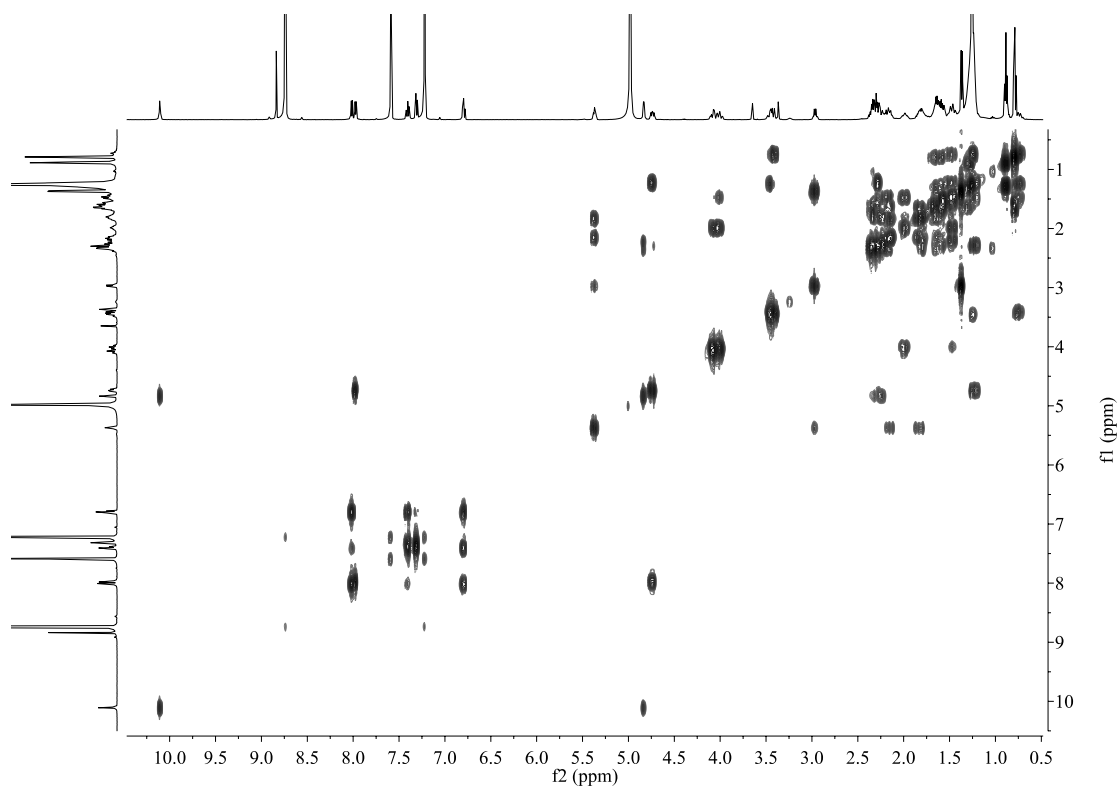

Fig. S7d  $^1\text{H}$ - $^1\text{H}$  COSY (500 MHz, Pyridine- $d_5$ ) spectrum of **7a**

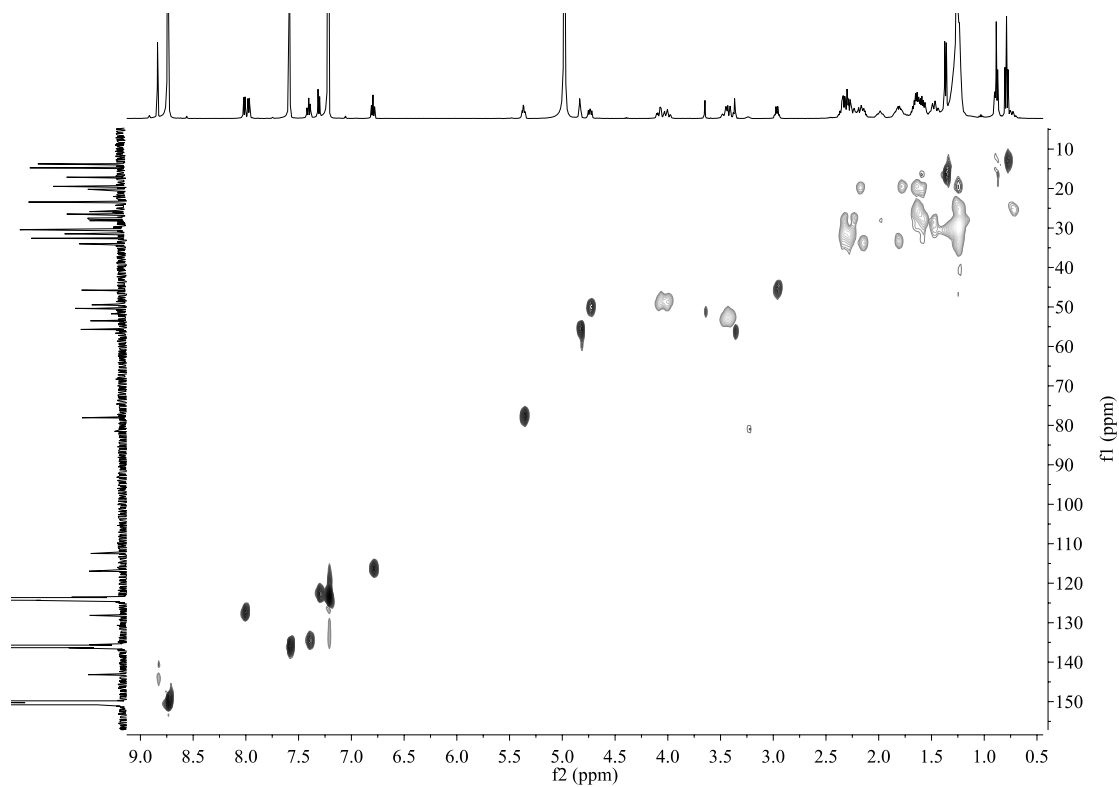

Fig. S7e HSQC (500 MHz/125 MHz, Pyridine-*d*<sub>5</sub>) spectrum of **7a**

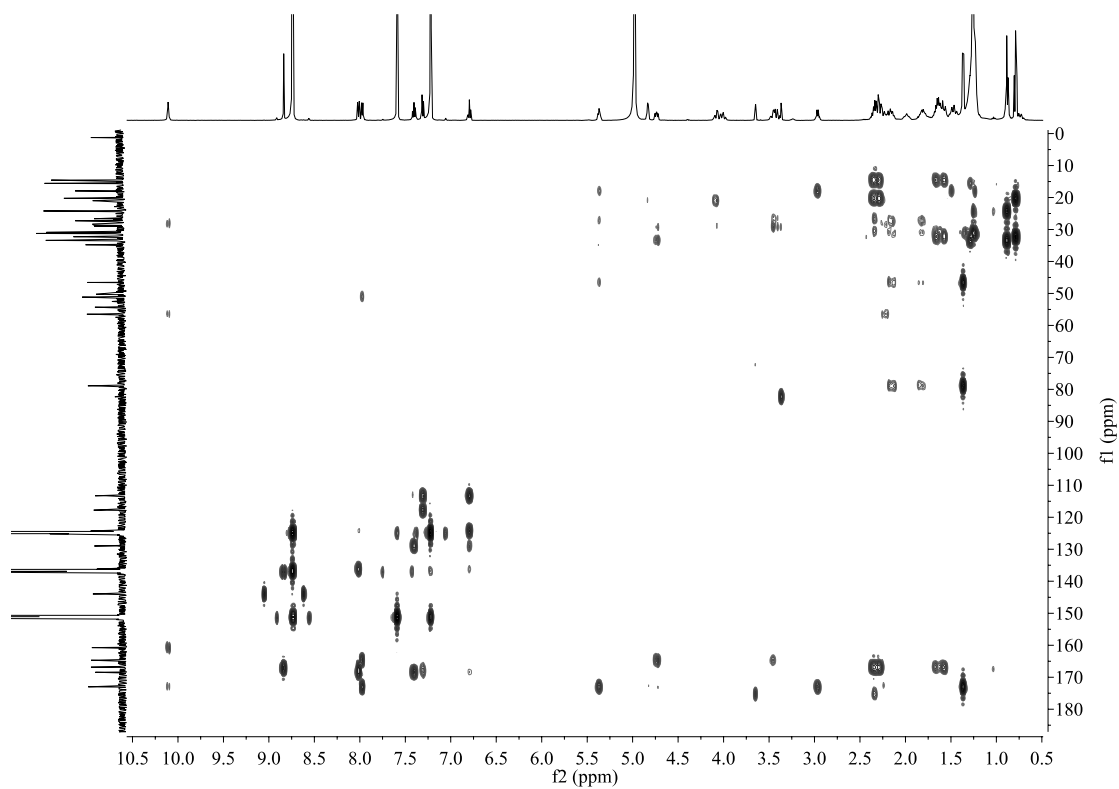

Fig. S7f HMBC (500 MHz/125 MHz, Pyridine-*d*<sub>5</sub>) spectrum of **7a**

Table S8 NMR data (<sup>1</sup>H NMR 500 MHz, <sup>13</sup>C NMR 125 MHz, Pyridine-*d*<sub>5</sub>) of **8a**

| Pos. | $\delta_C$ | $\delta_H$ , mult ( <i>J</i> in Hz) | <sup>1</sup> H- <sup>1</sup> H COSY | HMBC |
|------|------------|-------------------------------------|-------------------------------------|------|
| 1    | 112.5      |                                     |                                     |      |
| 2    | 167.6      |                                     |                                     |      |

|    |                        |                     |                   |                    |
|----|------------------------|---------------------|-------------------|--------------------|
| 3  | 123.4                  | 7.30, br d (8.4)    | 4                 | 1, 2, 5, 6         |
| 4  | 135.4                  | 7.39, dq (1.6, 7.0) | 3, 5, 6           | 1, 2, 3, 5, 6      |
| 5  | 117.0                  | 6.79, dq (0.8, 6.8) | 4, 6              | 1, 2, 3, 4, 6      |
| 6  | 128.1                  | 8.01, dd (1.5, 8.0) | 4, 5              | 2, 3, 4            |
| 7  | 166.3                  |                     |                   |                    |
| 9  | 143.2                  | 8.84, s             |                   | 7, 10              |
| 10 | 136.4                  |                     |                   |                    |
| 12 | 159.9                  |                     |                   |                    |
| 13 | NH                     | 10.11, d (3.0)      | 14                | 12, 14, 15, 28     |
| 14 | 55.7                   | 4.83, m             | 13, 28b           | 15, 29             |
| 15 | 171.9                  |                     |                   |                    |
| 17 | 78.1                   | 5.36, m             | 18, 35a, 35b      | 18, 19, 35, 36, 54 |
| 18 | 45.8                   | 2.95, m             | 17, 54            | 19, 54             |
| 19 | 172.2                  |                     |                   |                    |
| 20 | NH                     | 7.94, d (6.9)       | 21                | 19, 21, 22         |
| 21 | 50.4                   | 4.65, m             | 20, 27b           | 19, 22, 26, 27     |
| 22 | 163.9                  |                     |                   |                    |
| 24 | 53.5                   | 3.45, m             | 25a, 25b          | 22, 25, 26         |
| 25 | 25.9                   | 1.33-1.17, m        | 24, 25b, 26a, 26b | 22, 24             |
|    |                        | 0.74, m             | 24, 25a, 26b      |                    |
| 26 | 28.2                   | 1.69-1.53, m        | 25a, 27a          |                    |
|    |                        | 1.52-1.41, m        | 25a, 25b, 27b     |                    |
| 27 | 32.5                   | 2.30-2.10, m        | 21, 26a, 27b      |                    |
|    |                        | 1.33-1.17, m        | 27a               |                    |
| 28 | 27.4                   | 2.37-2.30, m        | 14, 28b, 29a, 29b |                    |
|    |                        | 2.30-2.10, m        | 14, 28a, 29a, 29b | 15, 30             |
| 29 | 20.2                   | 2.30-2.10, m        | 29b, 30b          | 14, 30             |
|    |                        | 1.86-1.76, m        | 28a, 28b, 29a     |                    |
| 30 | 27.5                   | 2.02-1.94, m        | 30b, 31           |                    |
|    |                        | 1.52-1.41, m        | 29a, 30a, 31      |                    |
| 31 | 49.3                   | 4.00, m             | 30a               | 29, 30, 33         |
| 33 | 166.8                  |                     |                   |                    |
| 34 | 23.5                   | 2.37-2.30, m        | 52                | 33, 52             |
| 35 | 34.0                   | 2.30-2.10, m        | 17, 35b, 36       | 17, 18, 36, 37     |
|    |                        | 1.86-1.76, m        | 17, 35a, 36       | 17, 18, 36, 37     |
| 36 | 26.5                   | 1.69-1.53, m        | 35a, 35b          | 17, 38             |
| 37 | 30.5-30.1 <sup>a</sup> | 1.33-1.17, m        |                   |                    |
| 38 | 30.5-30.1 <sup>a</sup> | 1.33-1.17, m        |                   |                    |
| 39 | 30.5-30.1 <sup>a</sup> | 1.33-1.17, m        |                   |                    |
| 40 | 30.5-30.1 <sup>a</sup> | 1.33-1.17, m        |                   |                    |
| 41 | 30.5-30.1 <sup>a</sup> | 1.33-1.17, m        |                   |                    |
| 42 | 30.5-30.1 <sup>a</sup> | 1.33-1.17, m        |                   |                    |
| 43 | 30.5-30.1 <sup>a</sup> | 1.33-1.17, m        |                   |                    |
| 44 | 30.5-30.1 <sup>a</sup> | 1.33-1.17, m        |                   |                    |
| 45 | 30.5-30.1 <sup>a</sup> | 1.33-1.17, m        |                   |                    |
| 46 | 30.5-30.1 <sup>a</sup> | 1.33-1.17, m        |                   | 48                 |

|    |      |               |           |            |
|----|------|---------------|-----------|------------|
| 47 | 32.6 | 1.33-1.17, m  | 37-46, 48 | 45         |
| 48 | 23.4 | 1.33-1.17, m  | 47, 49    | 47         |
| 49 | 14.8 | 0.88, t (6.8) | 48        | 47, 48     |
| 52 | 10.1 | 1.03, t (7.4) | 34        | 33, 34     |
| 54 | 17.2 | 1.35, d (7.3) | 18        | 17, 18, 19 |

<sup>a</sup> Overlapped each other.

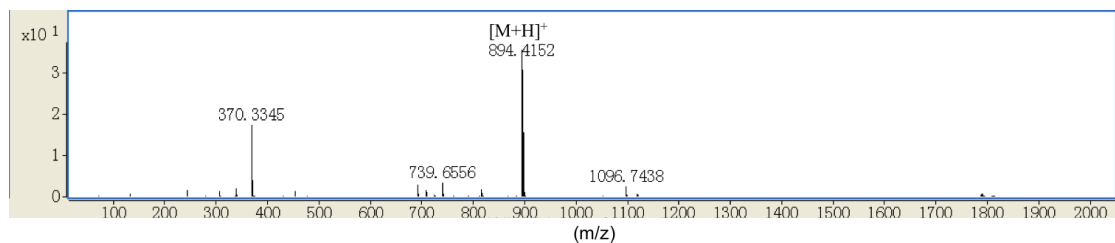

**Fig. S8a** HR-ESI-MS spectrum of **8a**

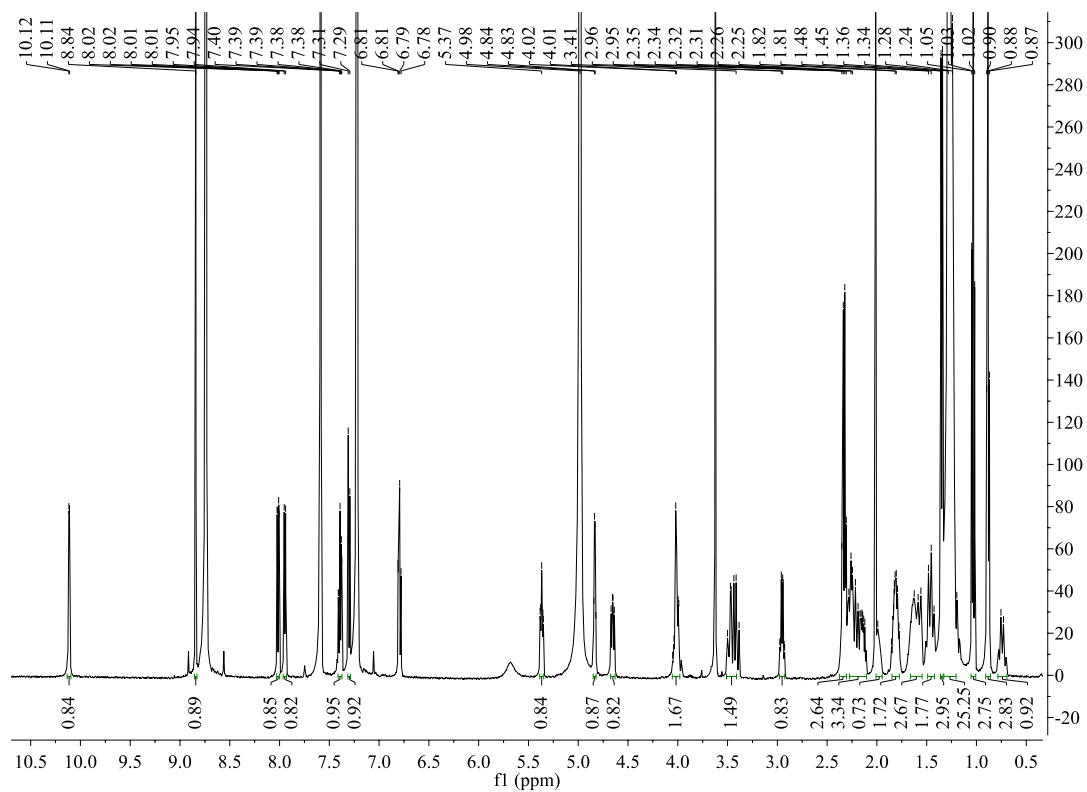

**Fig. S8b** <sup>1</sup>H NMR (500 MHz, Pyridine-*d*<sub>5</sub>) spectrum of **8a**

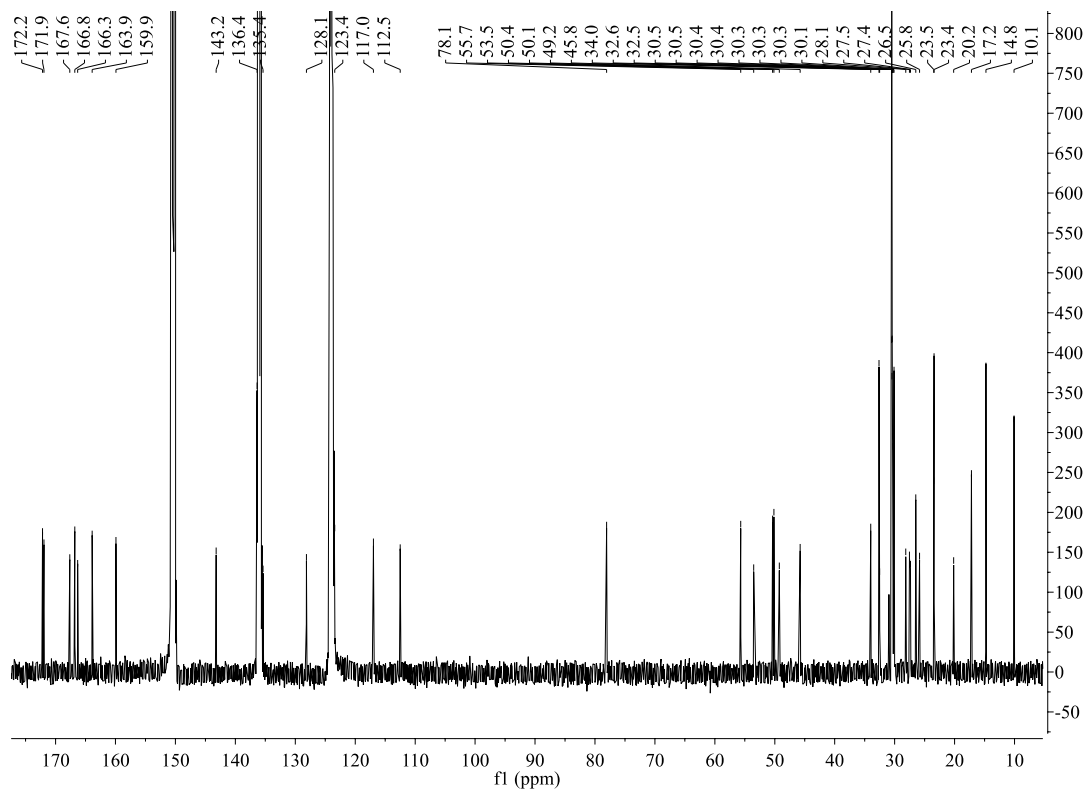

**Fig. S8c**  $^{13}\text{C}$  NMR (125 MHz, Pyridine- $d_5$ ) spectrum of **8a**

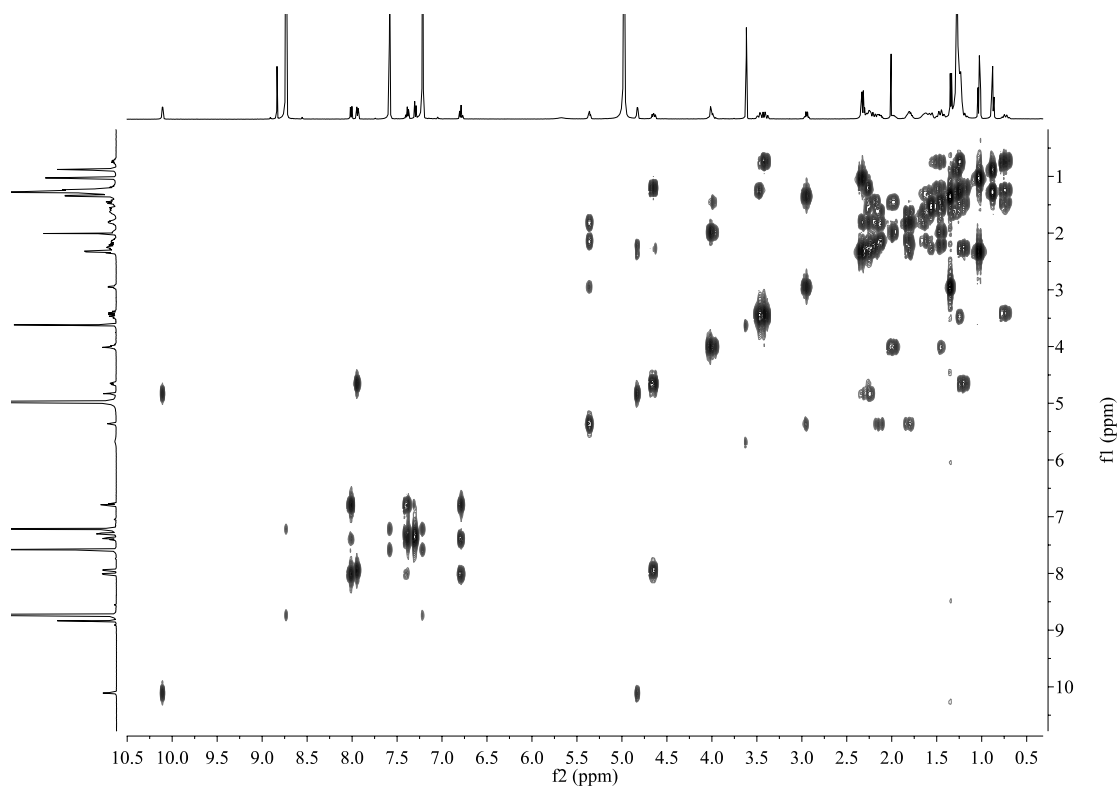

**Fig. S8d**  $^1\text{H}$ - $^1\text{H}$  COSY (500 MHz, Pyridine- $d_5$ ) spectrum of **8a**

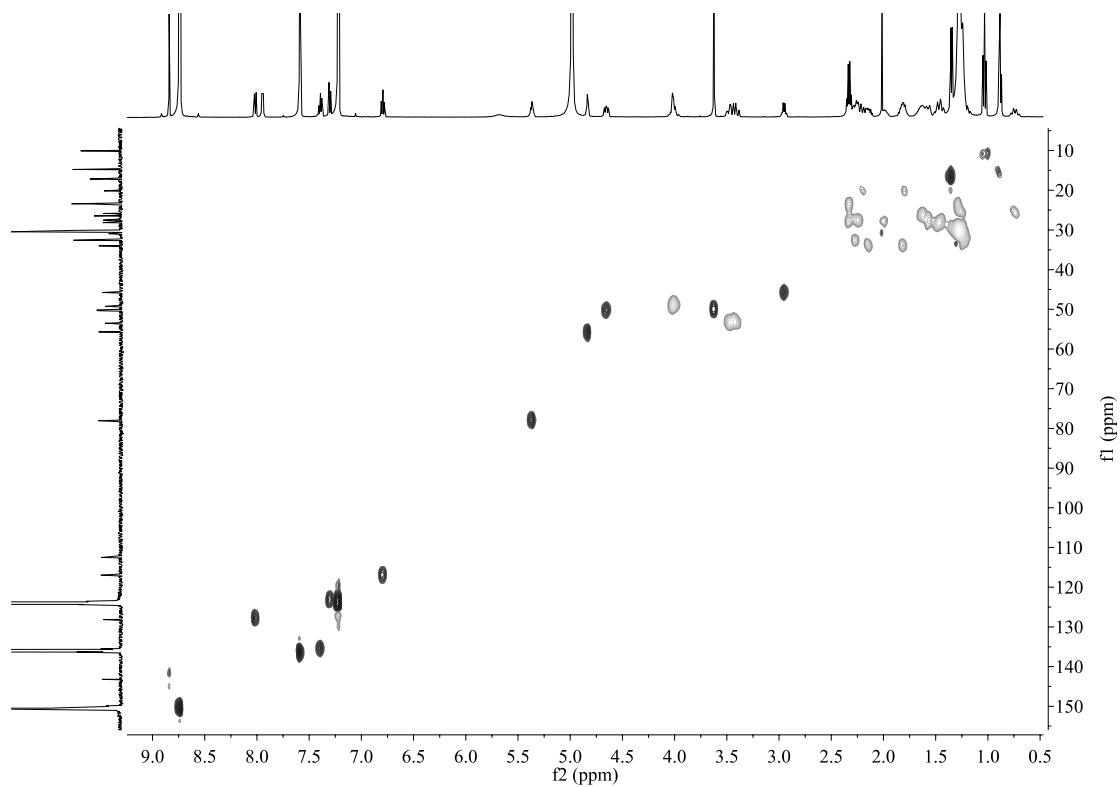

**Fig. S8e** HSQC (500 MHz/125 MHz, Pyridine-*d*<sub>5</sub>) spectrum of **8a**

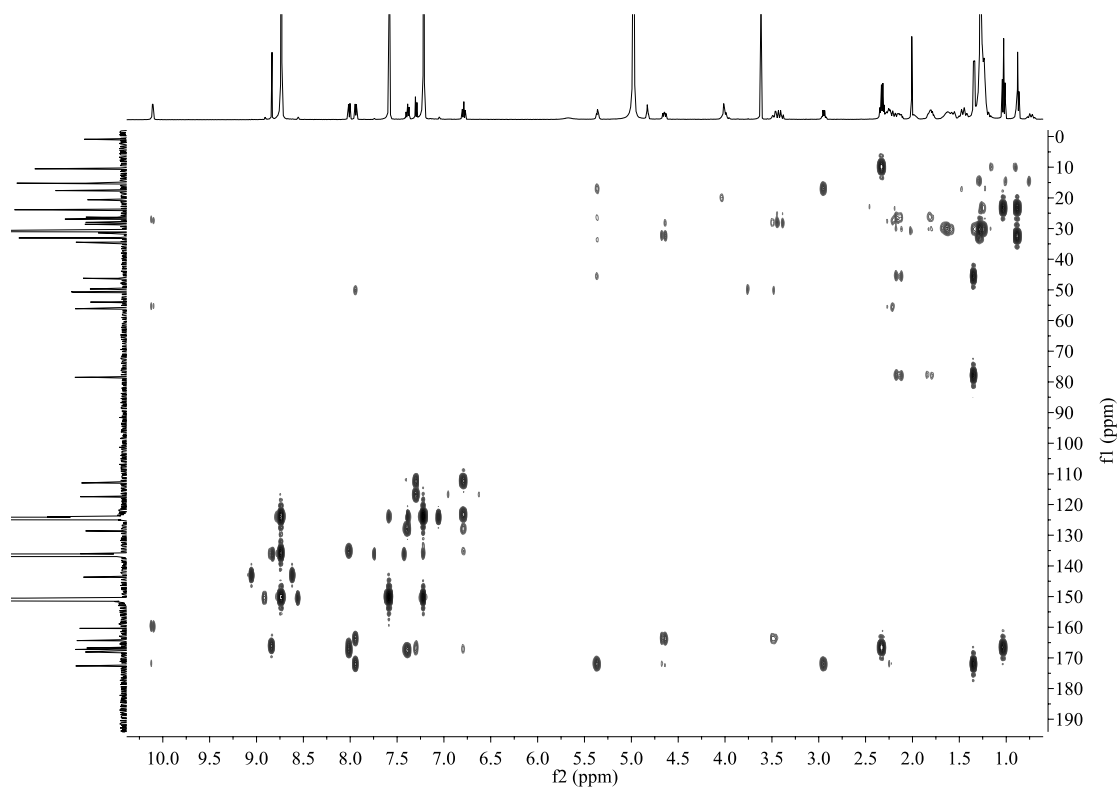

**Fig. S8f** HMBC (500 MHz/125 MHz, Pyridine-*d*<sub>5</sub>) spectrum of **8a**

**Table S9** NMR data (<sup>1</sup>H NMR 500 MHz, <sup>13</sup>C NMR 125 MHz, Pyridine-*d*<sub>5</sub>) of **9a**

| Pos. | $\delta_C$ | $\delta_H$ , mult ( <i>J</i> in Hz) | <sup>1</sup> H- <sup>1</sup> H COSY | HMBC |
|------|------------|-------------------------------------|-------------------------------------|------|
| 1    | 112.5      |                                     |                                     |      |
| 2    | 167.6      |                                     |                                     |      |

|    |                        |                     |                   |                    |
|----|------------------------|---------------------|-------------------|--------------------|
| 3  | 123.4                  | 7.31, br d (8.2)    | 4                 | 1, 2, 5, 6         |
| 4  | 135.4                  | 7.40, dq (1.7, 7.1) | 3, 5, 6           | 1, 2, 3, 5, 6      |
| 5  | 117.0                  | 6.79, dq (0.8, 7.4) | 4, 6              | 1, 2, 3, 4, 6      |
| 6  | 128.2                  | 8.01, dd (1.5, 8.0) | 4, 5              | 2, 3, 4            |
| 7  | 166.3                  |                     |                   |                    |
| 9  | 143.2                  | 8.84, s             |                   | 7, 10              |
| 10 | 136.4                  |                     |                   |                    |
| 12 | 160.0                  |                     |                   |                    |
| 13 | NH                     | 10.10, d (3.1)      | 14                | 12, 14, 15, 28     |
| 14 | 55.7                   | 4.83, m             | 13, 28b           | 15, 29             |
| 15 | 171.9                  |                     |                   |                    |
| 17 | 78.1                   | 5.37, m             | 18, 35a, 35b      | 18, 19, 35, 36, 54 |
| 18 | 45.7                   | 2.96, m             | 17, 54            | 19, 54             |
| 19 | 172.2                  |                     |                   |                    |
| 20 | NH                     | 7.97, d (7.0)       | 21                | 19, 21, 22         |
| 21 | 50.4                   | 4.73, m             | 20, 27b           | 19, 22, 26, 27     |
| 22 | 163.9                  |                     |                   |                    |
| 24 | 53.5                   | 3.45, m             | 25a, 25b          | 22, 25, 26         |
| 25 | 25.8                   | 1.30-1.23, m        | 24, 25b, 26a, 26b | 22, 24             |
|    |                        | 0.73, m             | 24, 25a, 26b      |                    |
| 26 | 28.2                   | 1.66-1.56, m        | 25a, 27a          |                    |
|    |                        | 1.50-1.43, m        | 25a, 25b, 27b     |                    |
| 27 | 32.5                   | 2.39-2.10, m        | 21, 26a, 27b      |                    |
|    |                        | 1.30-1.23, m        | 27a               |                    |
| 28 | 27.5                   | 2.39-2.10, m        | 14, 28b, 29a, 29b | 15, 30             |
| 29 | 20.2                   | 2.39-2.10, m        | 29b, 30b          | 14, 30             |
|    |                        | 1.85-1.77, m        | 28a, 28b, 29a     |                    |
| 30 | 27.8                   | 2.02-1.95, m        | 30b, 31           |                    |
|    |                        | 1.50-1.43, m        | 29a, 30a, 31      |                    |
| 31 | 49.5                   | 4.09, m             | 30a               | 29, 30, 33         |
| 33 | 166.8                  |                     |                   |                    |
| 34 | 31.5                   | 2.39-2.10, m        | 52                | 33, 52, 53         |
| 35 | 34.0                   | 2.39-2.10, m        | 17, 35b, 36       | 17, 18, 36, 37     |
|    |                        | 1.85-1.77, m        | 17, 35a, 36       | 17, 18, 36, 37     |
| 36 | 26.5                   | 1.66-1.56, m        | 35a, 35b          | 17, 38             |
| 37 | 30.5-30.1 <sup>a</sup> | 1.30-1.23, m        |                   |                    |
| 38 | 30.5-30.1 <sup>a</sup> | 1.30-1.23, m        |                   |                    |
| 39 | 30.5-30.1 <sup>a</sup> | 1.30-1.23, m        |                   |                    |
| 40 | 30.5-30.1 <sup>a</sup> | 1.30-1.23, m        |                   |                    |
| 41 | 30.5-30.1 <sup>a</sup> | 1.30-1.23, m        |                   |                    |
| 42 | 30.5-30.1 <sup>a</sup> | 1.30-1.23, m        |                   |                    |
| 43 | 30.5-30.1 <sup>a</sup> | 1.30-1.23, m        |                   |                    |
| 44 | 30.5-30.1 <sup>a</sup> | 1.30-1.23, m        |                   |                    |
| 45 | 30.5-30.1 <sup>a</sup> | 1.30-1.23, m        |                   |                    |
| 46 | 30.5-30.1 <sup>a</sup> | 1.30-1.23, m        |                   | 48                 |
| 47 | 32.6                   | 1.30-1.23, m        | 37-46, 48         | 45                 |



|    |      |               |        |            |
|----|------|---------------|--------|------------|
| 48 | 23.4 | 1.30-1.23, m  | 47, 49 | 47         |
| 49 | 14.8 | 0.88, t (6.8) | 48     | 47, 48     |
| 52 | 19.4 | 1.66-1.56, m  | 34, 53 | 33, 34, 53 |
| 53 | 13.8 | 0.79, t (7.3) | 52     | 34, 52     |
| 54 | 17.1 | 1.37, d (7.3) | 18     | 17, 18, 19 |

<sup>a</sup> Overlapped each other.

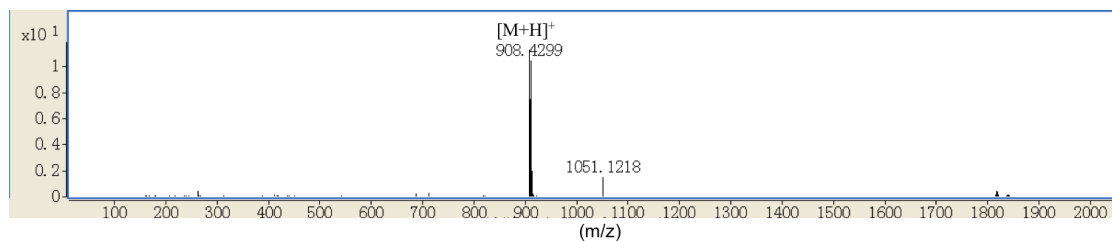

**Fig. S9a** HR-ESI-MS spectrum of **9a**

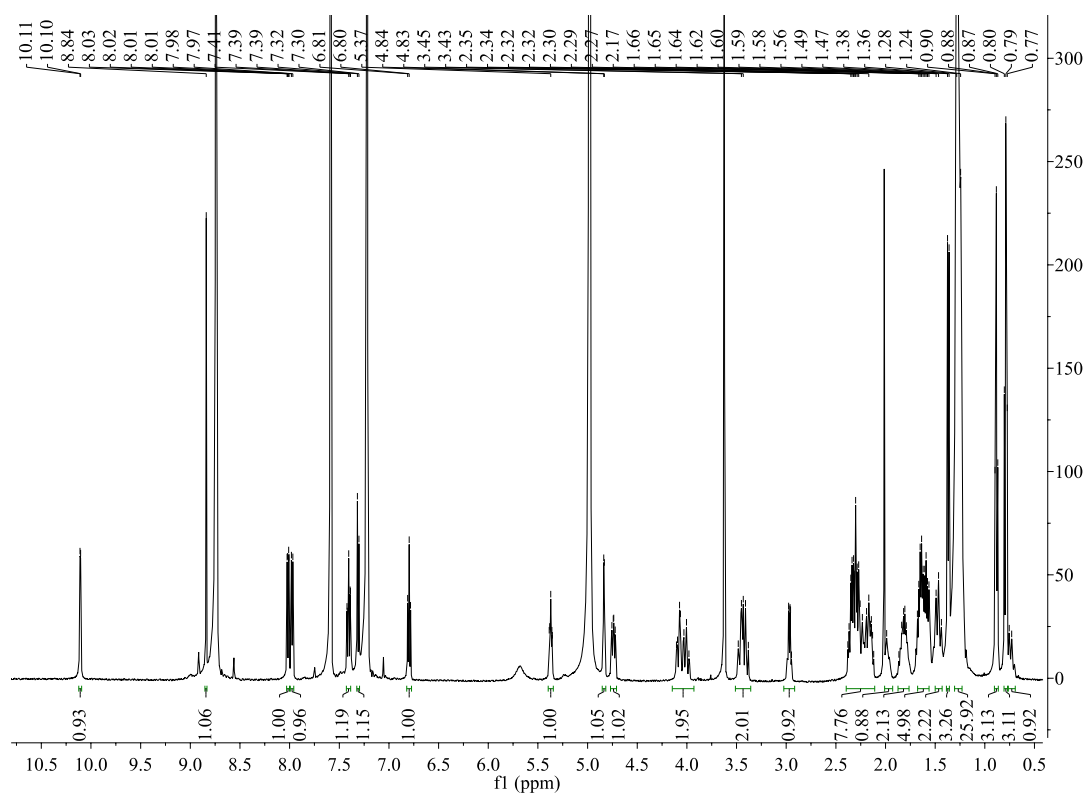

**Fig. S9b** <sup>1</sup>H NMR (500 MHz, Pyridine-*d*<sub>5</sub>) spectrum of **9a**

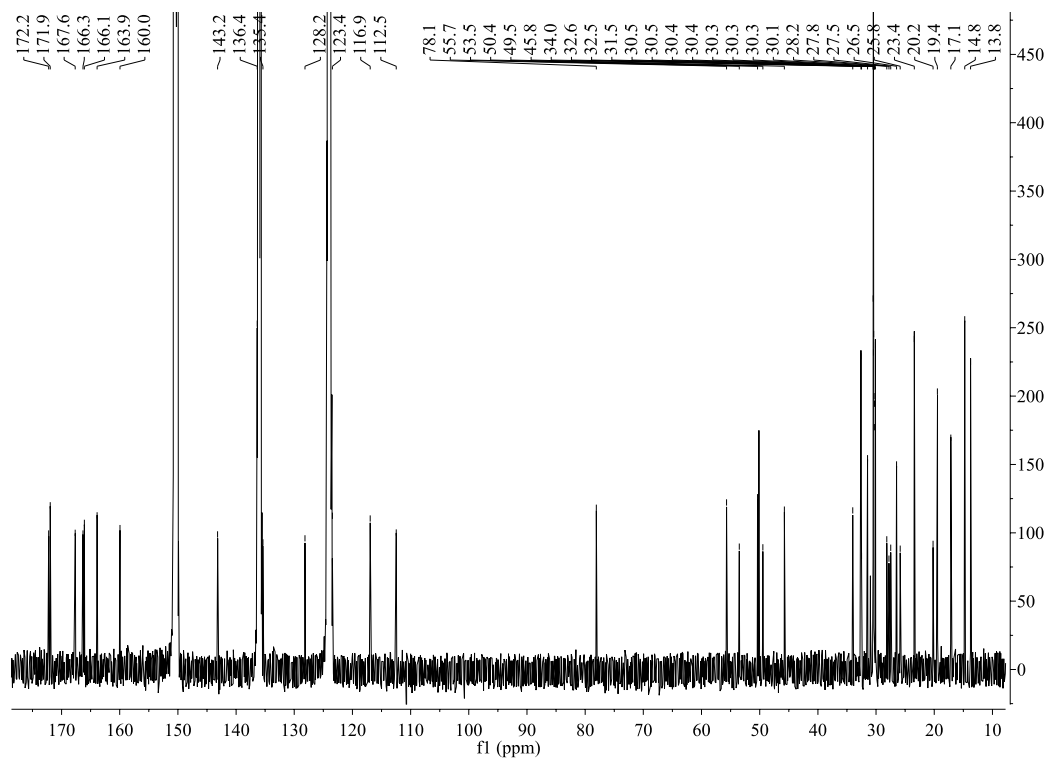

Fig. S9c  $^{13}\text{C}$  NMR (125 MHz, Pyridine- $d_5$ ) spectrum of **9a**

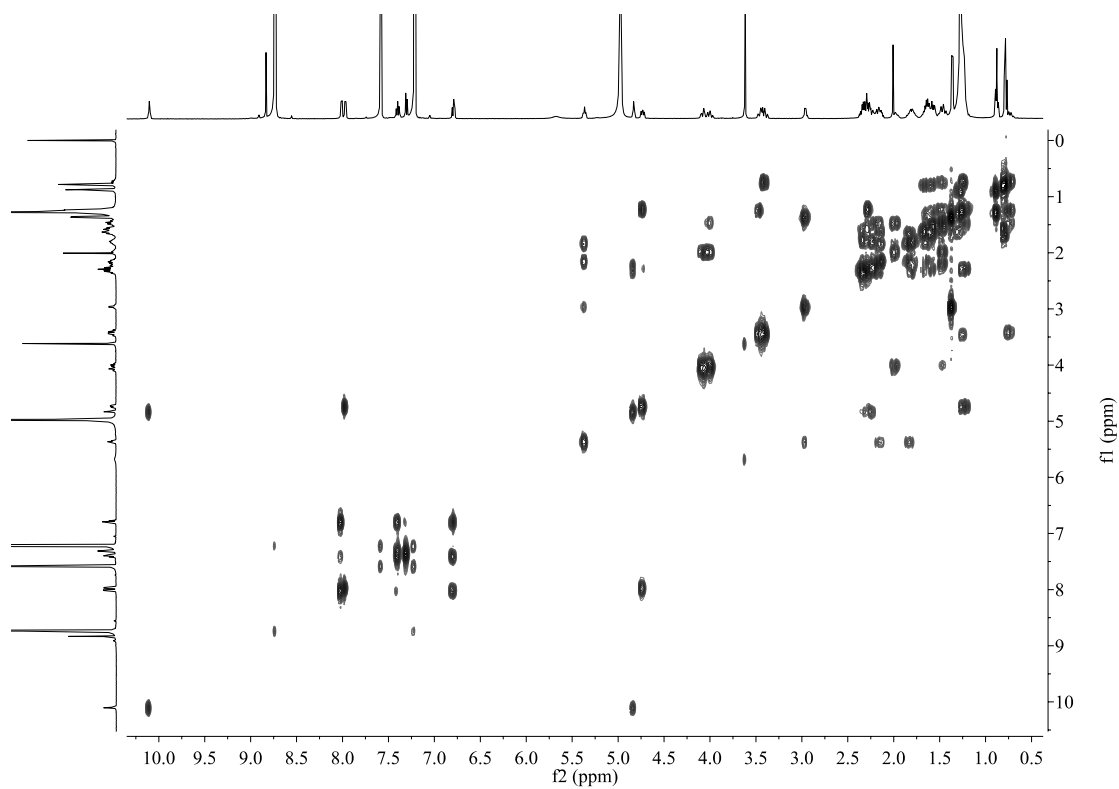

Fig. S9d  $^1\text{H}$ - $^1\text{H}$  COSY (500 MHz, Pyridine- $d_5$ ) spectrum of **9a**

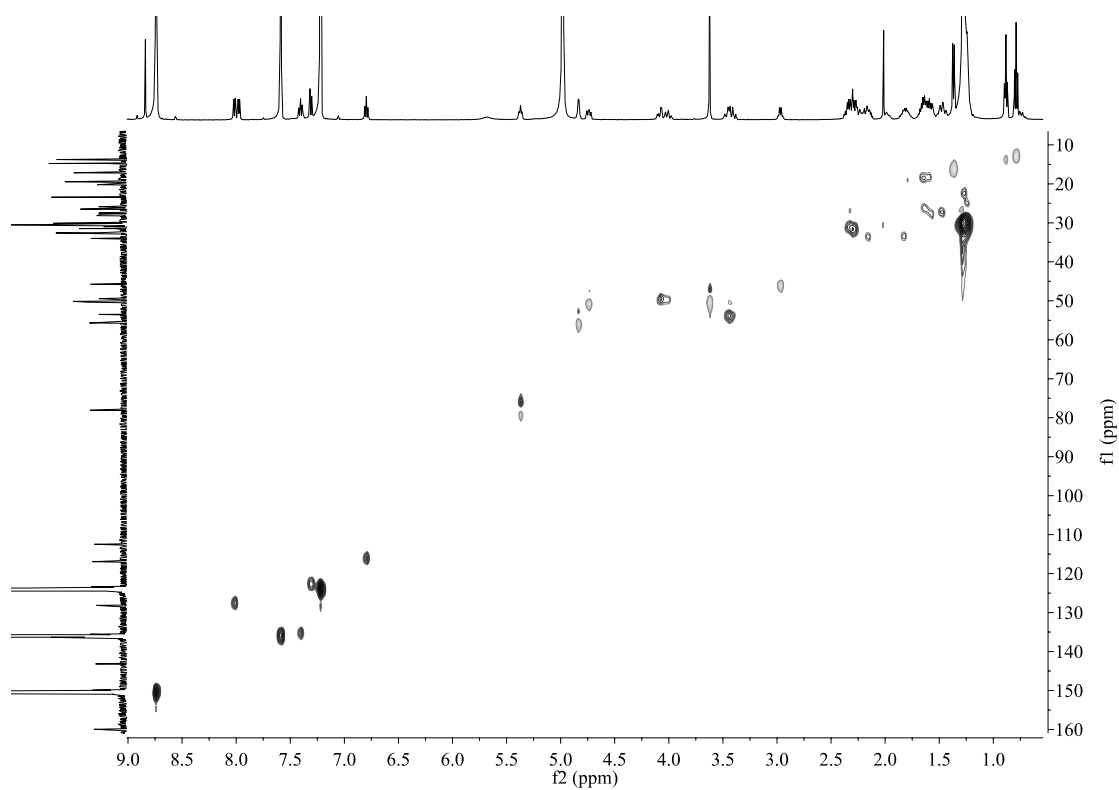

Fig. S9e HSQC (500 MHz/125 MHz, Pyridine-*d*<sub>5</sub>) spectrum of **9a**

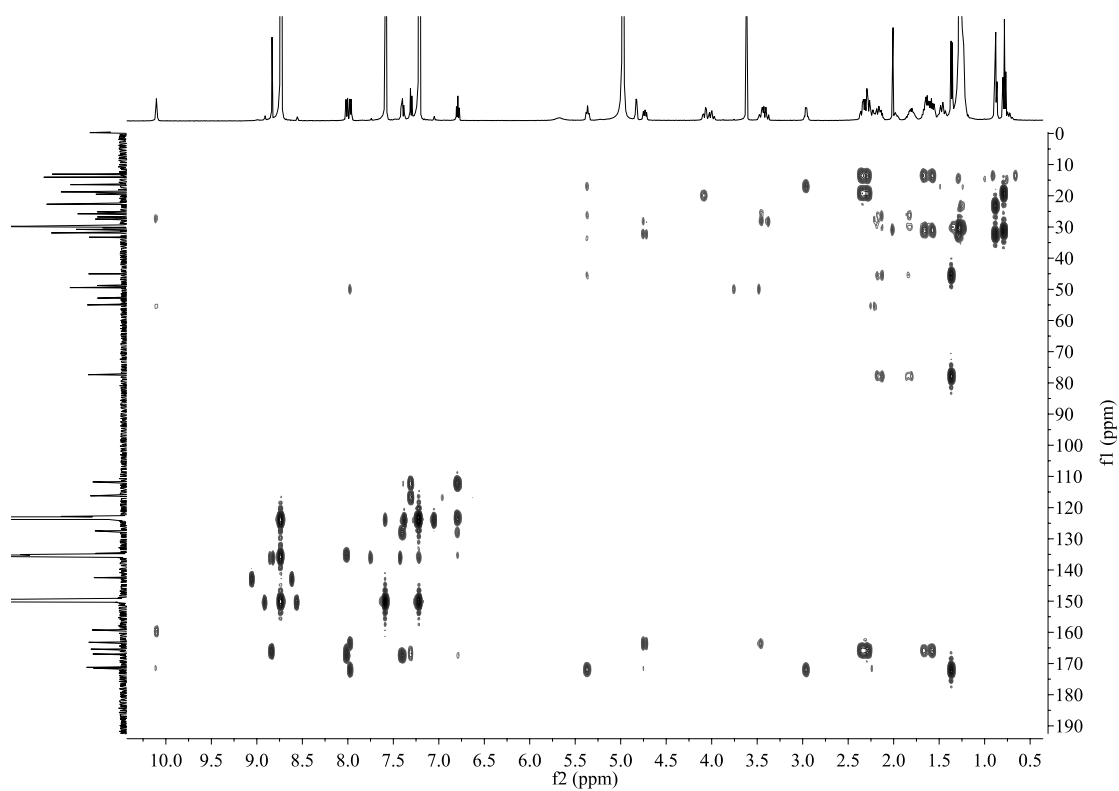

Fig. S9f HMBC (500 MHz/125 MHz, Pyridine-*d*<sub>5</sub>) spectrum of **9a**

Table S10 NMR data (<sup>1</sup>H NMR 500 MHz, <sup>13</sup>C NMR 125 MHz, Pyridine-*d*<sub>5</sub>) of **10a**

| Pos. | $\delta_C$ | $\delta_H$ , mult ( <i>J</i> in Hz) | <sup>1</sup> H- <sup>1</sup> H COSY | HMBC |
|------|------------|-------------------------------------|-------------------------------------|------|
| 1    | 112.5      |                                     |                                     |      |

---

|    |           |                     |                   |                    |
|----|-----------|---------------------|-------------------|--------------------|
| 2  | 167.6     |                     |                   |                    |
| 3  | 123.4     | 7.30, br d (8.4)    | 4                 | 1, 2, 5, 6         |
| 4  | 135.4     | 7.39, dq (1.6, 7.0) | 3, 5, 6           | 1, 2, 3, 5, 6      |
| 5  | 117.0     | 6.79, dq (0.8, 6.8) | 4, 6              | 1, 2, 3, 4, 6      |
| 6  | 128.1     | 8.01, dd (1.5, 8.0) | 4, 5              | 2, 3, 4            |
| 7  | 166.3     |                     |                   |                    |
| 9  | 143.2     | 8.84, s             |                   | 7, 10              |
| 10 | 136.4     |                     |                   |                    |
| 12 | 159.9     |                     |                   |                    |
| 13 | NH        | 10.11, d (3.0)      | 14                | 12, 14, 15, 28     |
| 14 | 55.7      | 4.83, m             | 13, 28b           | 15, 29             |
| 15 | 171.9     |                     |                   |                    |
| 17 | 78.1      | 5.36, m             | 18, 35a, 35b      | 18, 19, 35, 36, 54 |
| 18 | 45.8      | 2.95, m             | 17, 54            | 19, 54             |
| 19 | 172.2     |                     |                   |                    |
| 20 | NH        | 7.94, d (6.9)       | 21                | 19, 21, 22         |
| 21 | 50.4      | 4.65, m             | 20, 27b           | 19, 22, 26, 27     |
| 22 | 163.9     |                     |                   |                    |
| 24 | 53.5      | 3.45, m             | 25a, 25b          | 22, 25, 26         |
| 25 | 25.9      | 1.31-1.23, m        | 24, 25b, 26a, 26b | 22, 24             |
|    |           | 0.74, m             | 24, 25a, 26b      |                    |
| 26 | 28.2      | 1.69-1.53, m        | 25a, 27a          |                    |
|    |           | 1.52-1.41, m        | 25a, 25b, 27b     |                    |
| 27 | 32.5      | 2.30-2.10, m        | 21, 26a, 27b      |                    |
|    |           | 1.31-1.23, m        | 27a               |                    |
| 28 | 27.4      | 2.37-2.30, m        | 14, 28b, 29a, 29b |                    |
|    |           | 2.30-2.10, m        | 14, 28a, 29a, 29b | 15, 30             |
| 29 | 20.2      | 2.30-2.10, m        | 29b, 30b          | 14, 30             |
|    |           | 1.86-1.76, m        | 28a, 28b, 29a     |                    |
| 30 | 27.5      | 2.02-1.94, m        | 30b, 31           |                    |
|    |           | 1.52-1.41, m        | 29a, 30a, 31      |                    |
| 31 | 49.3      | 4.00, m             | 30a               | 29, 30, 33         |
| 33 | 166.8     |                     |                   |                    |
| 34 | 16.8      | 2.03, s             |                   | 33                 |
| 35 | 34.0      | 2.30-2.10, m        | 17, 35b, 36       | 17, 18, 36, 37     |
|    |           | 1.86-1.76, m        | 17, 35a, 36       | 17, 18, 36, 37     |
| 36 | 26.5      | 1.69-1.53, m        | 35a, 35b          | 17, 38             |
| 37 | 30.5-30.1 | 1.31-1.23, m        |                   |                    |
| 38 | 30.5-30.1 | 1.31-1.23, m        |                   |                    |
| 39 | 30.5-30.1 | 1.31-1.23, m        |                   |                    |
| 40 | 30.5-30.1 | 1.31-1.23, m        |                   |                    |
| 41 | 30.5-30.1 | 1.31-1.23, m        |                   |                    |
| 42 | 30.5-30.1 | 1.31-1.23, m        |                   |                    |
| 43 | 30.5-30.1 | 1.31-1.23, m        |                   |                    |
| 44 | 30.5-30.1 | 1.31-1.23, m        |                   |                    |
| 45 | 30.5-30.1 | 1.31-1.23, m        |                   |                    |

---

|    |           |               |           |            |
|----|-----------|---------------|-----------|------------|
| 46 | 30.5-30.1 | 1.31-1.23, m  |           |            |
| 47 | 30.5-30.1 | 1.31-1.23, m  |           |            |
| 48 | 30.5-30.1 | 1.31-1.23, m  |           | 50         |
| 49 | 32.6      | 1.31-1.23, m  | 37-48, 50 | 47         |
| 50 | 23.4      | 1.31-1.23, m  | 49, 51    | 49         |
| 51 | 14.8      | 0.88, t (6.8) | 50        | 49, 50     |
| 54 | 17.2      | 1.35, d (7.3) | 18        | 17, 18, 19 |

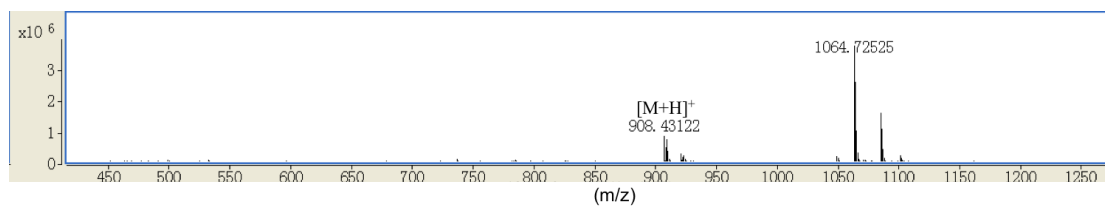

**Fig. S10a** HR-ESI-MS spectrum of **10a**

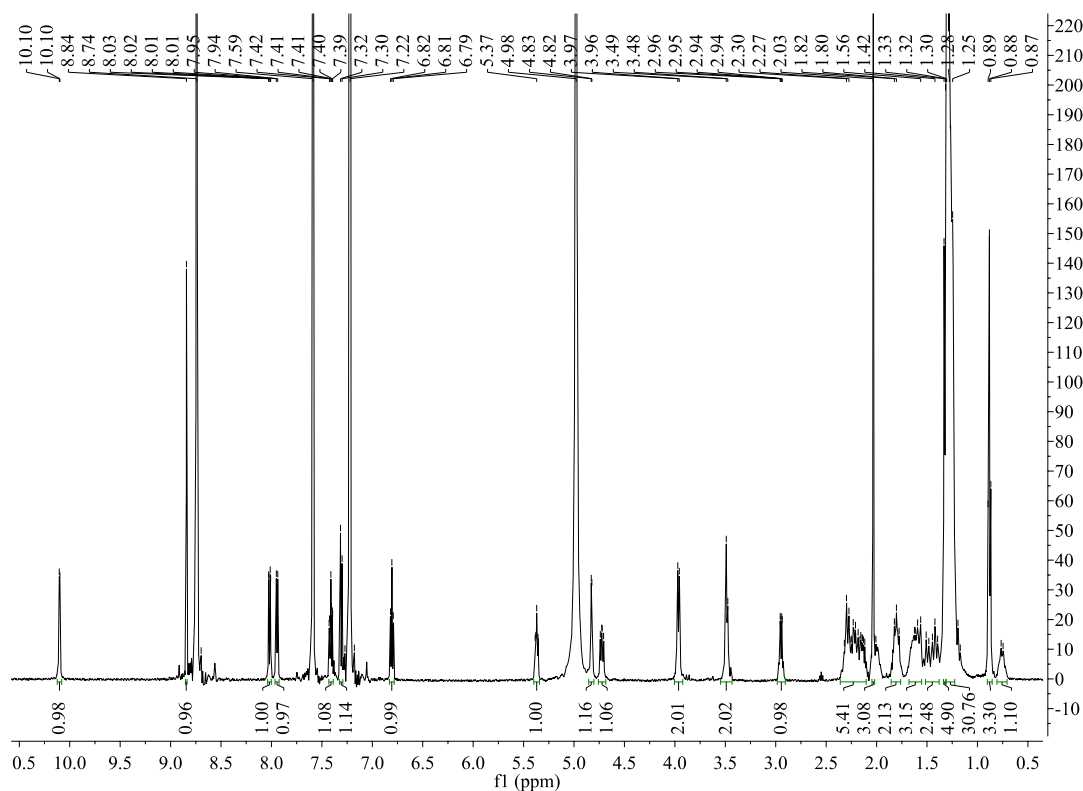

**Fig. S10b**  $^1\text{H}$  NMR (500 MHz, Pyridine- $d_5$ ) spectrum of **10a**

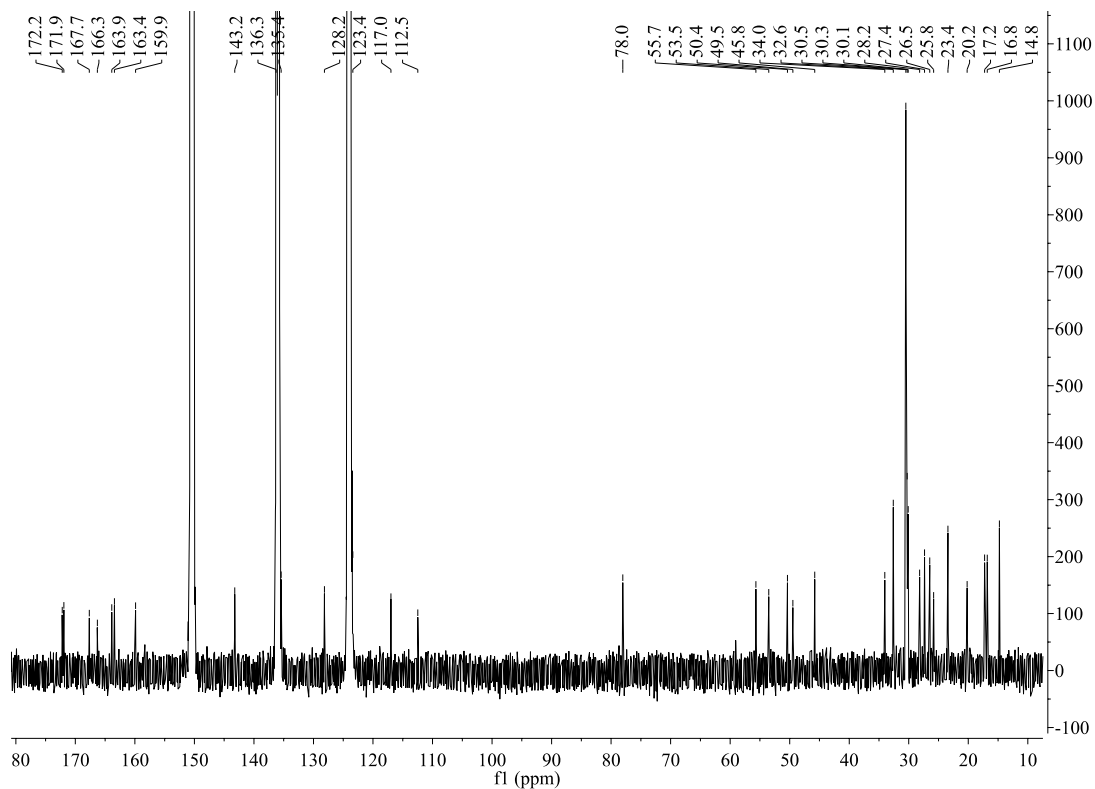

**Fig. S10c**  $^{13}\text{C}$  NMR (125 MHz, Pyridine- $d_5$ ) spectrum of **10a**

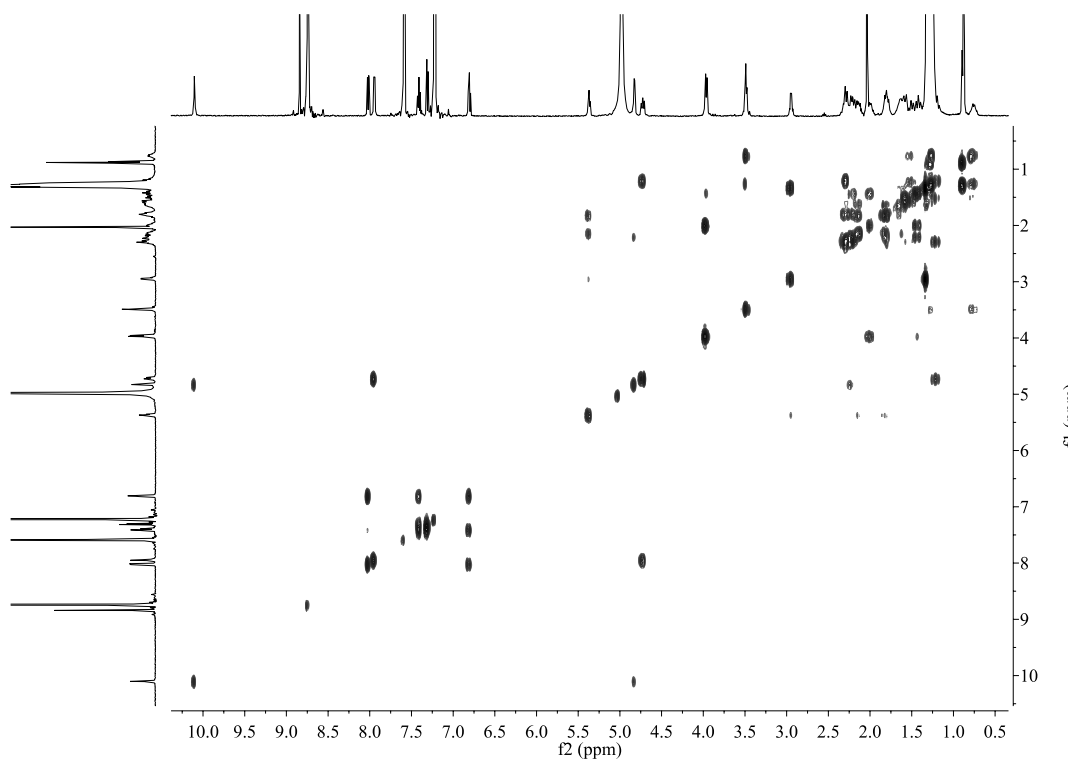

**Fig. S10d**  $^1\text{H}$ - $^1\text{H}$  COSY (500 MHz, Pyridine- $d_5$ ) spectrum of **10a**

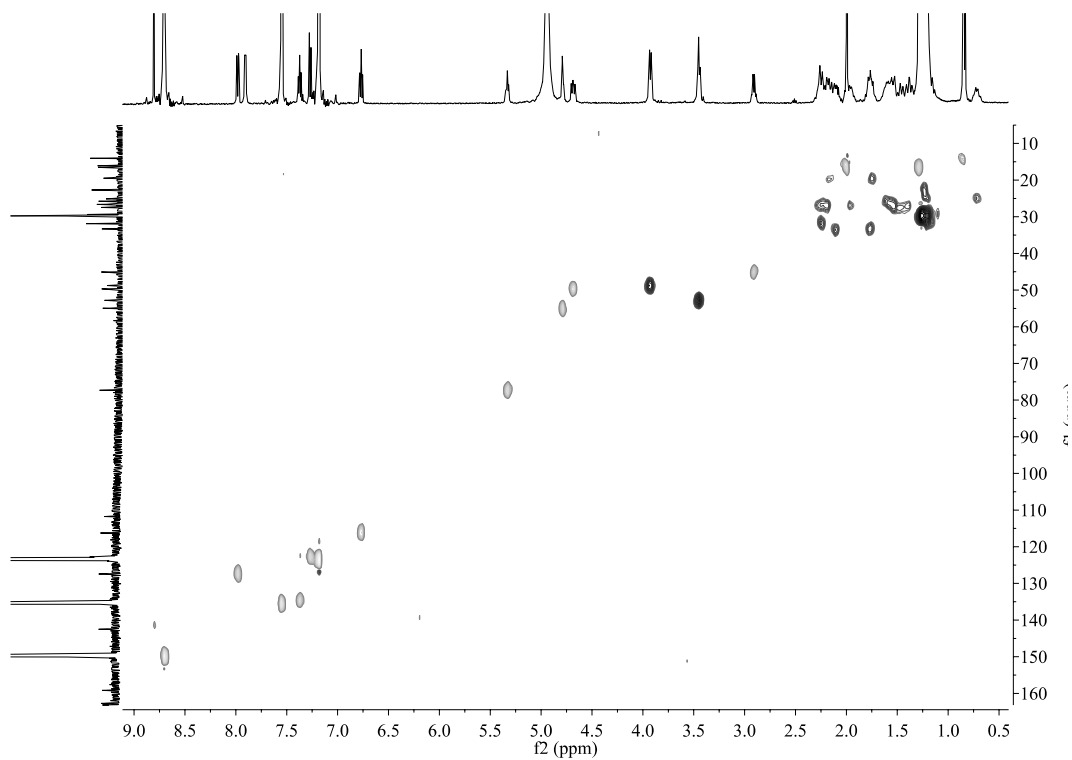

**Fig. S10e** HSQC (500 MHz/125 MHz, Pyridine-*d*<sub>5</sub>) spectrum of **10a**

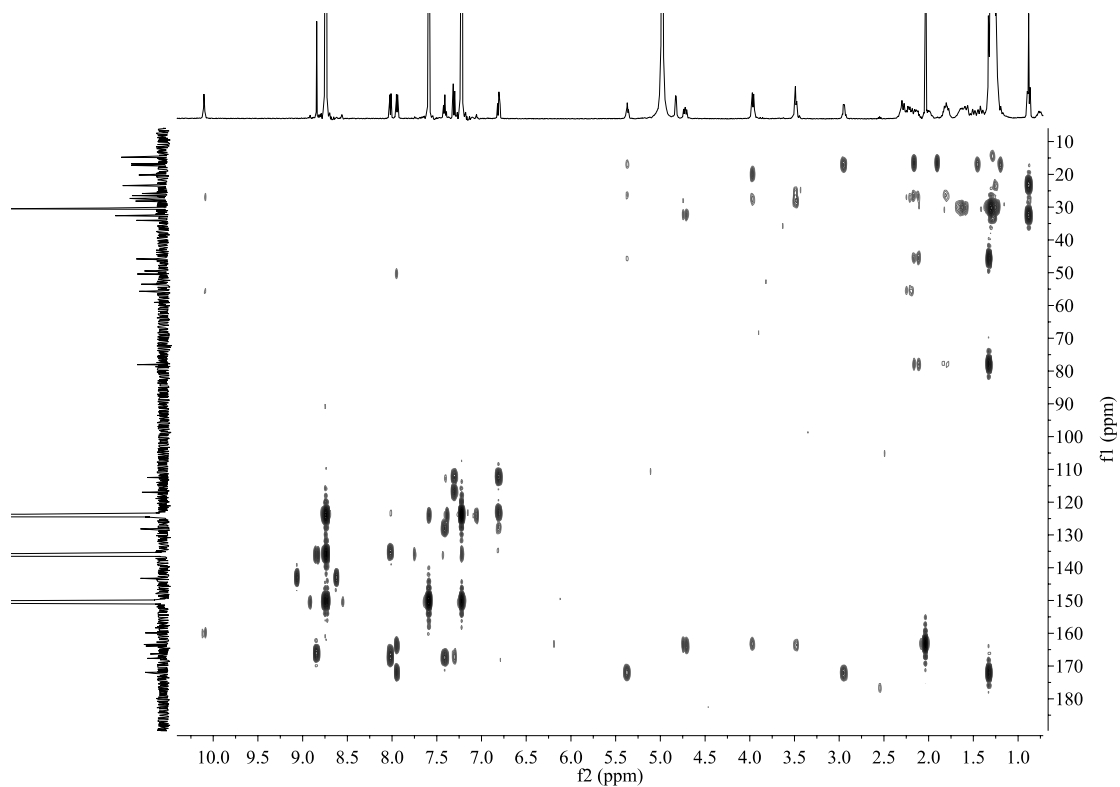

**Fig. S10f** HMBC (500 MHz/125 MHz, Pyridine-*d*<sub>5</sub>) spectrum of **10a**

**Table S11** NMR data (<sup>1</sup>H NMR 500 MHz, <sup>13</sup>C NMR 125 MHz, Pyridine-*d*<sub>5</sub>) of **11a**

| Pos. | $\delta_C$             | $\delta_H$ , mult ( <i>J</i> in Hz) | <sup>1</sup> H- <sup>1</sup> H COSY | HMBC               |
|------|------------------------|-------------------------------------|-------------------------------------|--------------------|
| 1    | 112.5                  |                                     |                                     |                    |
| 2    | 167.6                  |                                     |                                     |                    |
| 3    | 123.4                  | 7.30, br d (8.4)                    | 4                                   | 1, 2, 5, 6         |
| 4    | 135.4                  | 7.39, dq (1.6, 7.0)                 | 3, 5, 6                             | 1, 2, 3, 5, 6      |
| 5    | 117.0                  | 6.79, dq (0.8, 6.8)                 | 4, 6                                | 1, 2, 3, 4, 6      |
| 6    | 128.1                  | 8.01, dd (1.5, 8.0)                 | 4, 5                                | 2, 3, 4            |
| 7    | 166.3                  |                                     |                                     |                    |
| 9    | 143.2                  | 8.84, s                             |                                     | 7, 10              |
| 10   | 136.4                  |                                     |                                     |                    |
| 12   | 159.9                  |                                     |                                     |                    |
| 13   | NH                     | 10.11, d (3.0)                      | 14                                  | 12, 14, 15, 28     |
| 14   | 55.7                   | 4.83, m                             | 13, 28b                             | 15, 29             |
| 15   | 171.9                  |                                     |                                     |                    |
| 17   | 78.1                   | 5.36, m                             | 18, 35a, 35b                        | 18, 19, 35, 36, 54 |
| 18   | 45.8                   | 2.95, m                             | 17, 54                              | 19, 54             |
| 19   | 172.2                  |                                     |                                     |                    |
| 20   | NH                     | 7.94, d (6.9)                       | 21                                  | 19, 21, 22         |
| 21   | 50.4                   | 4.65, m                             | 20, 27b                             | 19, 22, 26, 27     |
| 22   | 163.9                  |                                     |                                     |                    |
| 24   | 53.5                   | 3.45, m                             | 25a, 25b                            | 22, 25, 26         |
| 25   | 25.9                   | 1.31-1.23, m                        | 24, 25b, 26a, 26b                   | 22, 24             |
|      |                        | 0.74, m                             | 24, 25a, 26b                        |                    |
| 26   | 28.2                   | 1.69-1.53, m                        | 25a, 27a                            |                    |
|      |                        | 1.52-1.41, m                        | 25a, 25b, 27b                       |                    |
| 27   | 32.5                   | 2.30-2.10, m                        | 21, 26a, 27b                        |                    |
|      |                        | 1.31-1.23, m                        | 27a                                 |                    |
| 28   | 27.4                   | 2.37-2.30, m                        | 14, 28b, 29a, 29b                   |                    |
|      |                        | 2.30-2.10, m                        | 14, 28a, 29a, 29b                   | 15, 30             |
| 29   | 20.2                   | 2.30-2.10, m                        | 29b, 30b                            | 14, 30             |
|      |                        | 1.86-1.76, m                        | 28a, 28b, 29a                       |                    |
| 30   | 27.5                   | 2.02-1.94, m                        | 30b, 31                             |                    |
|      |                        | 1.52-1.41, m                        | 29a, 30a, 31                        |                    |
| 31   | 49.3                   | 4.00, m                             | 30a                                 | 29, 30, 33         |
| 33   | 166.8                  |                                     |                                     |                    |
| 34   | 23.5                   | 2.37-2.30, m                        | 52                                  | 33, 52             |
| 35   | 34.0                   | 2.30-2.10, m                        | 17, 35b, 36                         | 17, 18, 36, 37     |
|      |                        | 1.86-1.76, m                        | 17, 35a, 36                         | 17, 18, 36, 37     |
| 36   | 26.5                   | 1.69-1.53, m                        | 35a, 35b                            | 17, 38             |
| 37   | 30.5-30.1 <sup>a</sup> | 1.31-1.23, m                        |                                     |                    |
| 38   | 30.5-30.1 <sup>a</sup> | 1.31-1.23, m                        |                                     |                    |
| 39   | 30.5-30.1 <sup>a</sup> | 1.31-1.23, m                        |                                     |                    |
| 40   | 30.5-30.1 <sup>a</sup> | 1.31-1.23, m                        |                                     |                    |
| 41   | 30.5-30.1 <sup>a</sup> | 1.31-1.23, m                        |                                     |                    |
| 42   | 30.5-30.1 <sup>a</sup> | 1.31-1.23, m                        |                                     |                    |



|    |                        |               |           |            |
|----|------------------------|---------------|-----------|------------|
| 43 | 30.5-30.1 <sup>a</sup> | 1.31-1.23, m  |           |            |
| 44 | 30.5-30.1 <sup>a</sup> | 1.31-1.23, m  |           |            |
| 45 | 30.5-30.1 <sup>a</sup> | 1.31-1.23, m  |           |            |
| 46 | 30.5-30.1 <sup>a</sup> | 1.31-1.23, m  |           |            |
| 47 | 30.5-30.1 <sup>a</sup> | 1.31-1.23, m  |           |            |
| 48 | 30.5-30.1 <sup>a</sup> | 1.31-1.23, m  |           | 50         |
| 49 | 32.6                   | 1.31-1.23, m  | 37-48, 50 | 47         |
| 50 | 23.4                   | 1.31-1.23, m  | 49, 51    | 49         |
| 51 | 14.8                   | 0.88, t (6.8) | 50        | 49, 50     |
| 52 | 10.1                   | 1.03, t (7.4) | 34        | 33, 34     |
| 54 | 17.2                   | 1.35, d (7.3) | 18        | 17, 18, 19 |

<sup>a</sup> Overlapped each other.

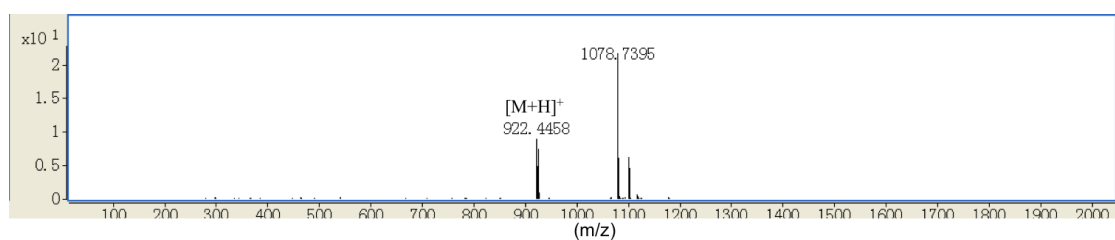

**Fig. S11a** HR-ESI-MS spectrum of **11a**

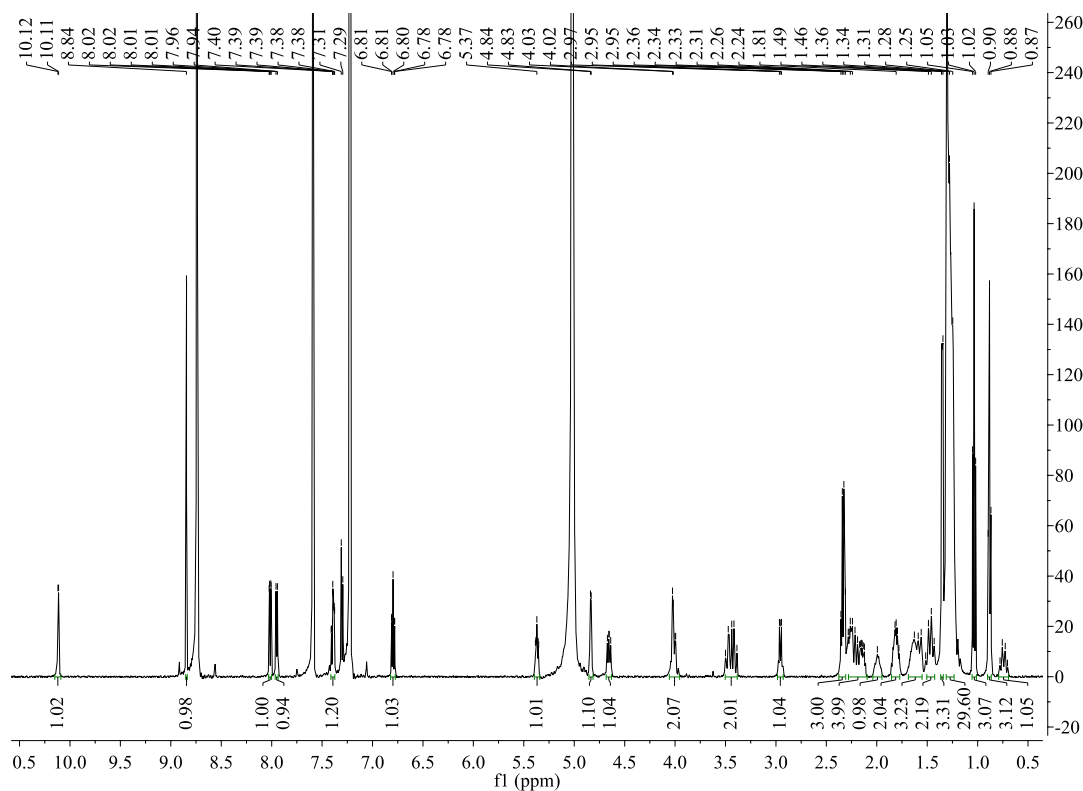

**Fig. S11b** <sup>1</sup>H NMR (500 MHz, Pyridine-*d*<sub>5</sub>) spectrum of **11a**

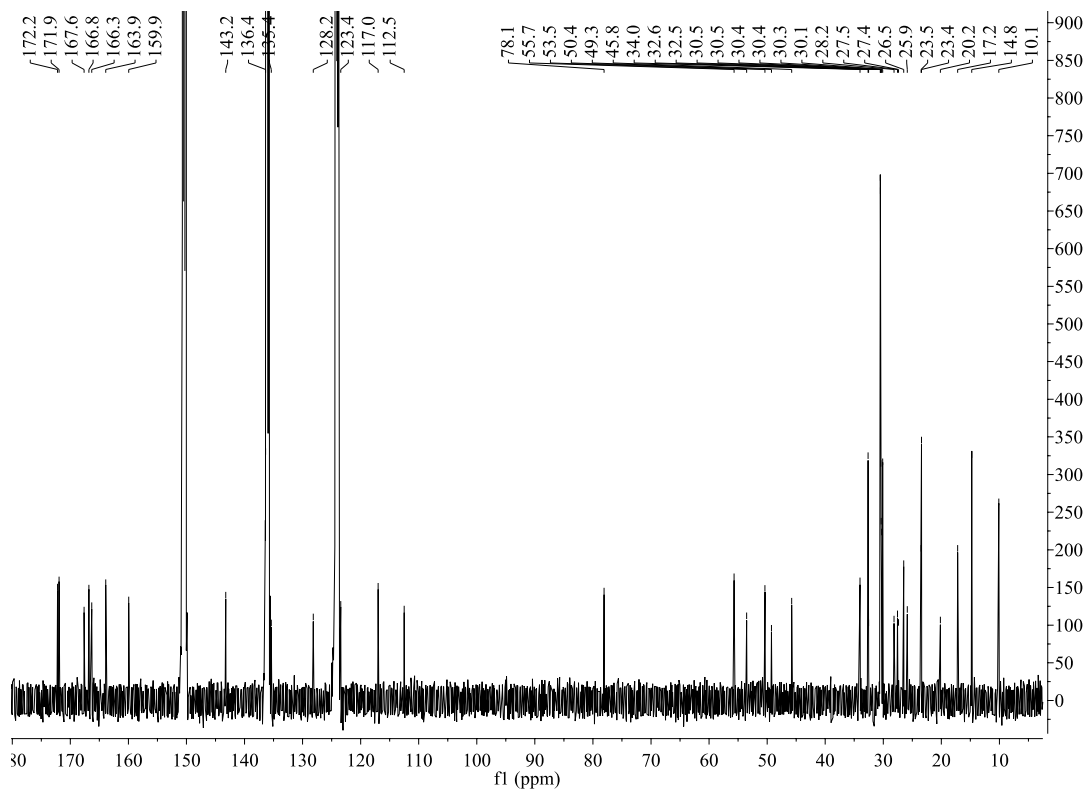

Fig. S11c  $^{13}\text{C}$  NMR (125 MHz, Pyridine- $d_5$ ) spectrum of **11a**

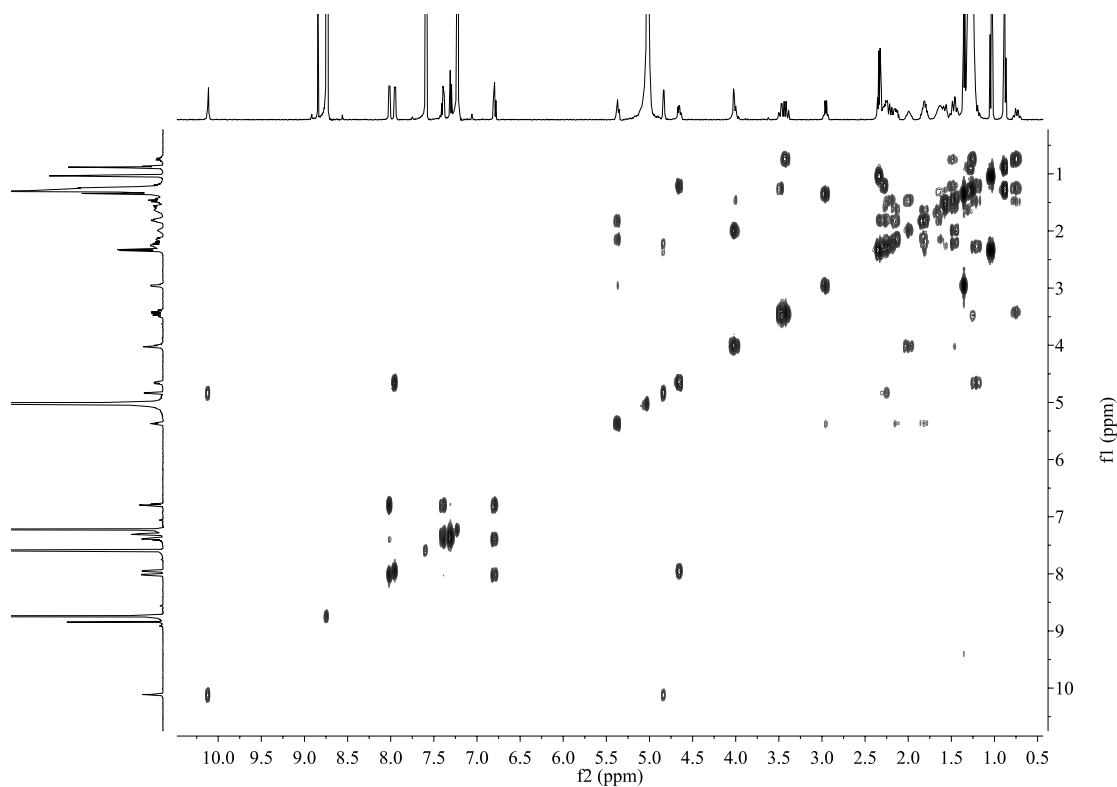

Fig. S11d  $^1\text{H}$ - $^1\text{H}$  COSY (500 MHz, Pyridine- $d_5$ ) spectrum of **11a**

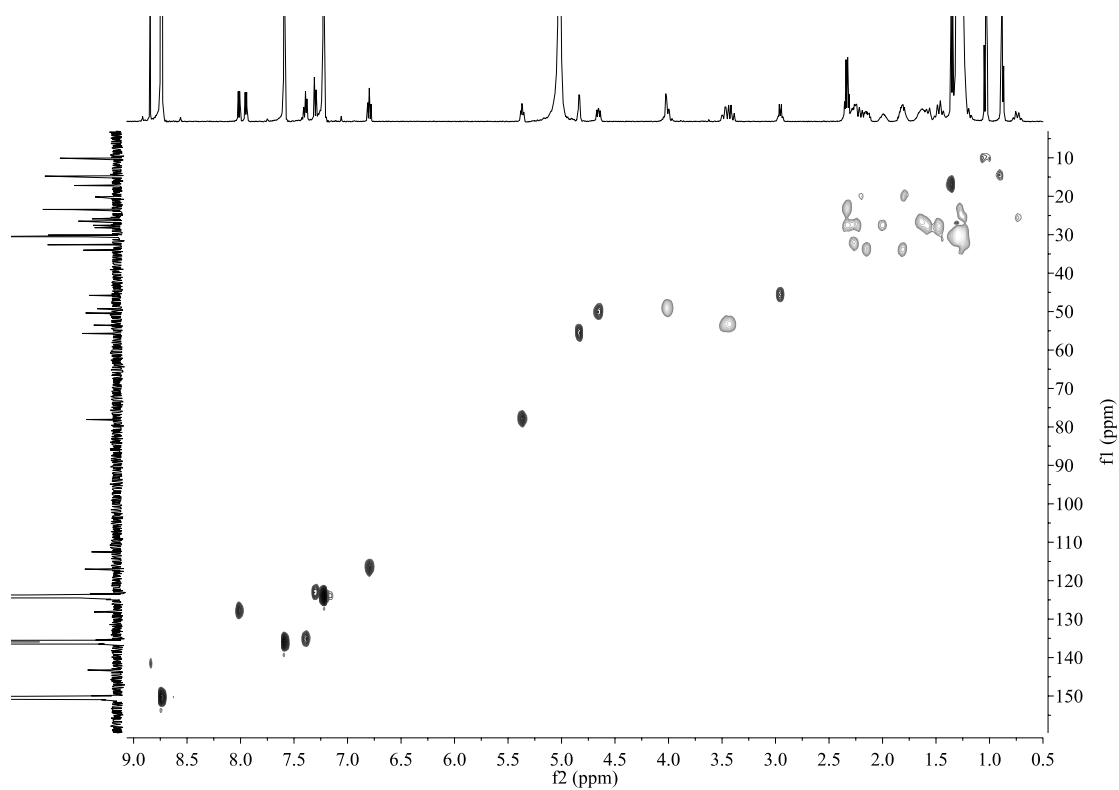

Fig. S11e HSQC (500 MHz/125 MHz, Pyridine-*d*<sub>5</sub>) spectrum of **11a**

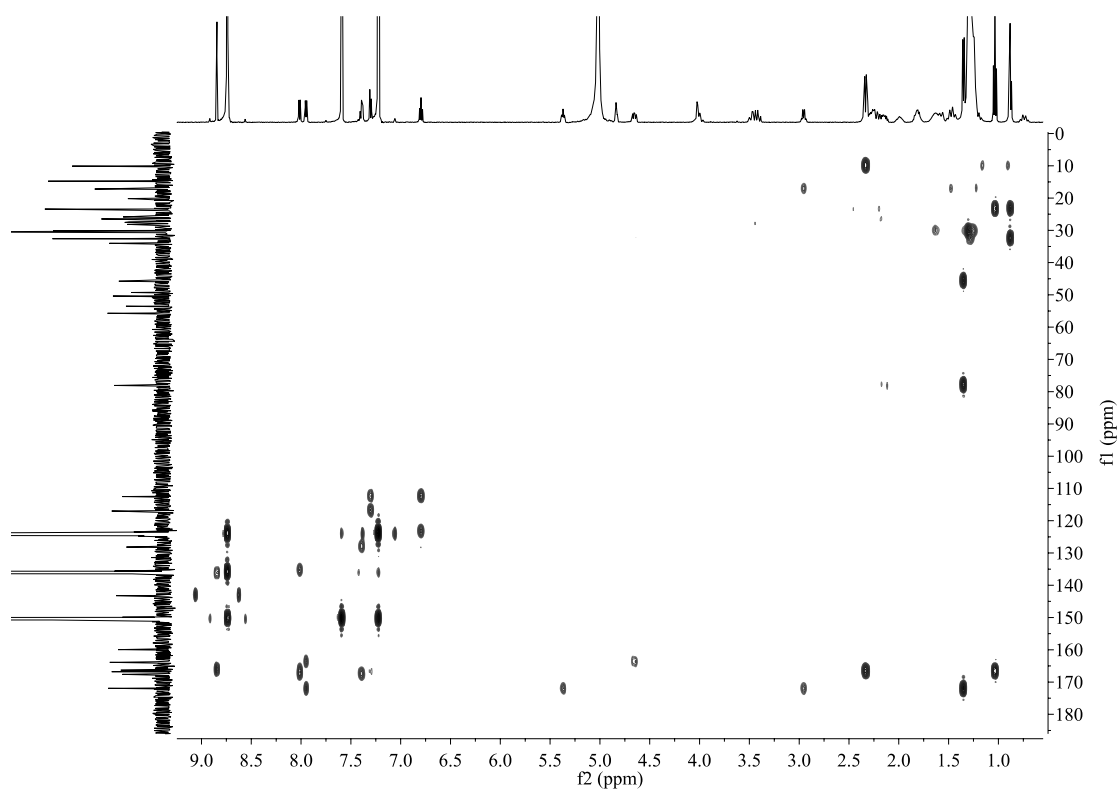

Fig. S11f HMBC (500 MHz/125 MHz, Pyridine-*d*<sub>5</sub>) spectrum of **11a**

Table S12 NMR data (<sup>1</sup>H NMR 500 MHz, <sup>13</sup>C NMR 125 MHz, Pyridine-*d*<sub>5</sub>) of **12a**

| Pos. | $\delta_C$ | $\delta_H$ , mult ( <i>J</i> in Hz) | <sup>1</sup> H- <sup>1</sup> H COSY | HMBC |
|------|------------|-------------------------------------|-------------------------------------|------|
| 1    | 112.5      |                                     |                                     |      |

---

|    |                        |                     |                   |                    |
|----|------------------------|---------------------|-------------------|--------------------|
| 2  | 167.6                  |                     |                   |                    |
| 3  | 123.4                  | 7.31, br d (8.2)    | 4                 | 1, 2, 5, 6         |
| 4  | 135.4                  | 7.40, dq (1.7, 7.1) | 3, 5, 6           | 1, 2, 3, 5, 6      |
| 5  | 117.0                  | 6.79, dq (0.8, 7.4) | 4, 6              | 1, 2, 3, 4, 6      |
| 6  | 128.2                  | 8.01, dd (1.5, 8.0) | 4, 5              | 2, 3, 4            |
| 7  | 166.3                  |                     |                   |                    |
| 9  | 143.2                  | 8.84, s             |                   | 7, 10              |
| 10 | 136.4                  |                     |                   |                    |
| 12 | 160.0                  |                     |                   |                    |
| 13 | NH                     | 10.10, d (3.1)      | 14                | 12, 14, 15, 28     |
| 14 | 55.7                   | 4.83, m             | 13, 28b           | 15, 29             |
| 15 | 171.9                  |                     |                   |                    |
| 17 | 78.1                   | 5.37, m             | 18, 35a, 35b      | 18, 19, 35, 36, 54 |
| 18 | 45.7                   | 2.96, m             | 17, 54            | 19, 54             |
| 19 | 172.2                  |                     |                   |                    |
| 20 | NH                     | 7.97, d (7.0)       | 21                | 19, 21, 22         |
| 21 | 50.4                   | 4.73, m             | 20, 27b           | 19, 22, 26, 27     |
| 22 | 163.9                  |                     |                   |                    |
| 24 | 53.5                   | 3.45, m             | 25a, 25b          | 22, 25, 26         |
| 25 | 25.8                   | 1.32-1.23, m        | 24, 25b, 26a, 26b | 22, 24             |
|    |                        | 0.73, m             | 24, 25a, 26b      |                    |
| 26 | 28.2                   | 1.66-1.56, m        | 25a, 27a          |                    |
|    |                        | 1.50-1.43, m        | 25a, 25b, 27b     |                    |
| 27 | 32.5                   | 2.39-2.10, m        | 21, 26a, 27b      |                    |
|    |                        | 1.32-1.23, m        | 27a               |                    |
| 28 | 27.5                   | 2.39-2.10, m        | 14, 28b, 29a, 29b | 15, 30             |
| 29 | 20.2                   | 2.39-2.10, m        | 29b, 30b          | 14, 30             |
|    |                        | 1.85-1.77, m        | 28a, 28b, 29a     |                    |
| 30 | 27.8                   | 2.02-1.95, m        | 30b, 31           |                    |
|    |                        | 1.50-1.43, m        | 29a, 30a, 31      |                    |
| 31 | 49.5                   | 4.09, m             | 30a               | 29, 30, 33         |
| 33 | 166.8                  |                     |                   |                    |
| 34 | 31.5                   | 2.39-2.10, m        | 52                | 33, 52, 53         |
| 35 | 34.0                   | 2.39-2.10, m        | 17, 35b, 36       | 17, 18, 36, 37     |
|    |                        | 1.85-1.77, m        | 17, 35a, 36       | 17, 18, 36, 37     |
| 36 | 26.5                   | 1.66-1.56, m        | 35a, 35b          | 17, 38             |
| 37 | 30.5-30.1 <sup>a</sup> | 1.32-1.23, m        |                   |                    |
| 38 | 30.5-30.1 <sup>a</sup> | 1.32-1.23, m        |                   |                    |
| 39 | 30.5-30.1 <sup>a</sup> | 1.32-1.23, m        |                   |                    |
| 40 | 30.5-30.1 <sup>a</sup> | 1.32-1.23, m        |                   |                    |
| 41 | 30.5-30.1 <sup>a</sup> | 1.32-1.23, m        |                   |                    |
| 42 | 30.5-30.1 <sup>a</sup> | 1.32-1.23, m        |                   |                    |
| 43 | 30.5-30.1 <sup>a</sup> | 1.32-1.23, m        |                   |                    |
| 44 | 30.5-30.1 <sup>a</sup> | 1.32-1.23, m        |                   |                    |
| 45 | 30.5-30.1 <sup>a</sup> | 1.32-1.23, m        |                   |                    |
| 46 | 30.5-30.1 <sup>a</sup> | 1.32-1.23, m        |                   |                    |

---

|    |                        |               |           |            |
|----|------------------------|---------------|-----------|------------|
| 47 | 30.5-30.1 <sup>a</sup> | 1.32-1.23, m  |           |            |
| 48 | 30.5-30.1 <sup>a</sup> | 1.32-1.23, m  |           | 50         |
| 49 | 32.6                   | 1.32-1.23, m  | 37-48, 50 | 47         |
| 50 | 23.4                   | 1.32-1.23, m  | 49, 51    | 49         |
| 51 | 14.8                   | 0.88, t (6.8) | 50        | 49, 50     |
| 52 | 19.4                   | 1.66-1.56, m  | 34, 53    | 33, 34, 53 |
| 53 | 13.8                   | 0.79, t (7.3) | 52        | 34, 52     |
| 54 | 17.1                   | 1.37, d (7.3) | 18        | 17, 18, 19 |

<sup>a</sup> Overlapped each other.

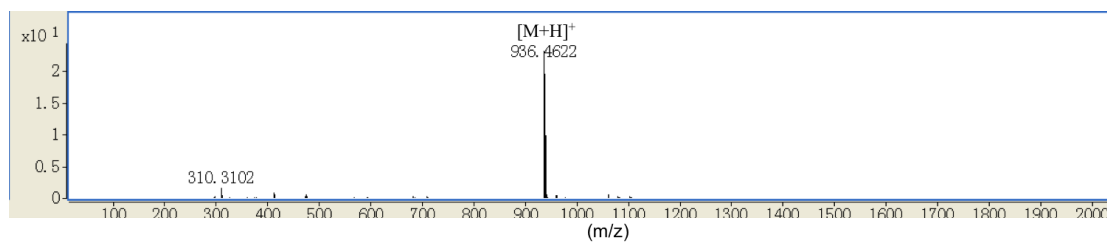

**Fig. S12a** HR-ESI-MS spectrum of 12a

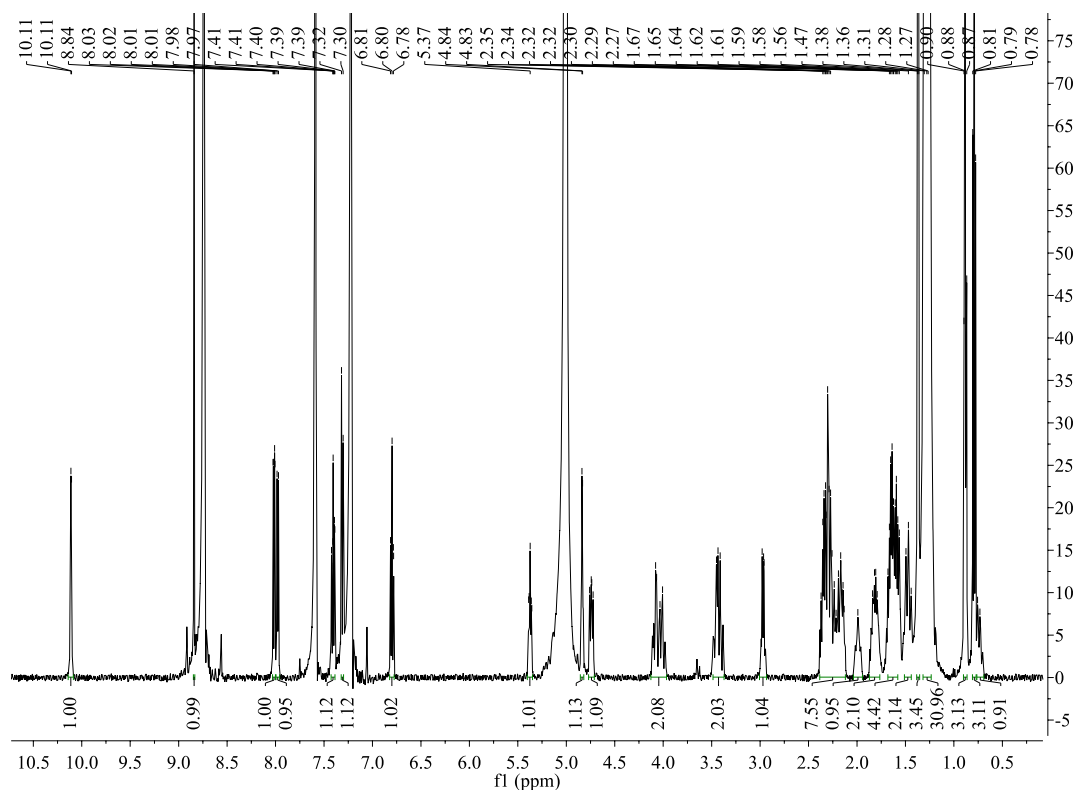

**Fig. S12b** <sup>1</sup>H NMR (500 MHz, Pyridine-*d*<sub>5</sub>) spectrum of 12a

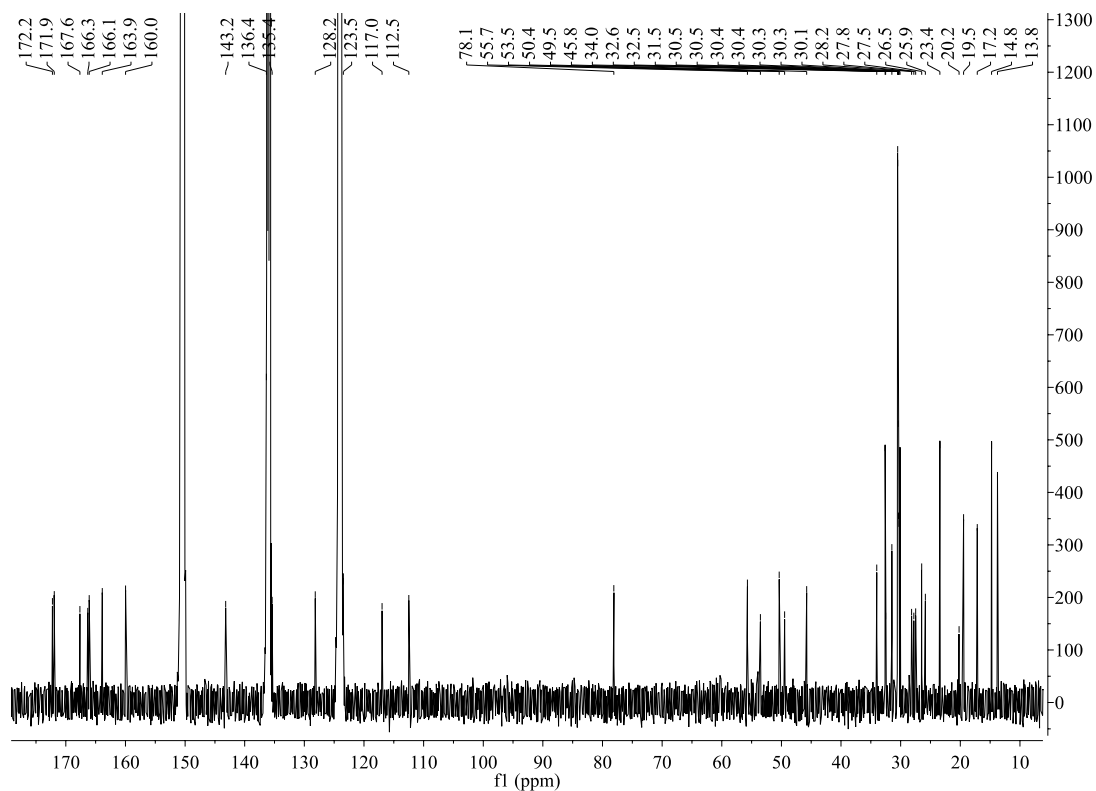

**Fig. S12c**  $^{13}\text{C}$  NMR (125 MHz, Pyridine- $d_5$ ) spectrum of **12a**

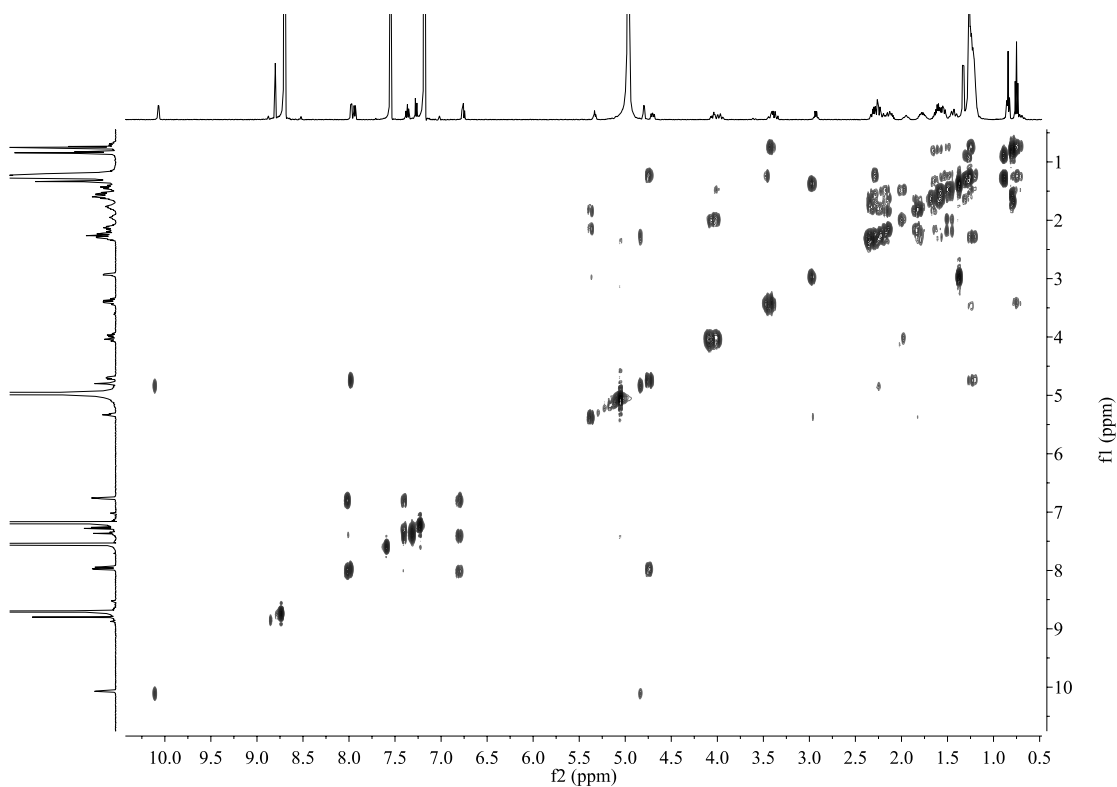

**Fig. S12d**  $^1\text{H}$ - $^1\text{H}$  COSY (500 MHz, Pyridine- $d_5$ ) spectrum of **12a**

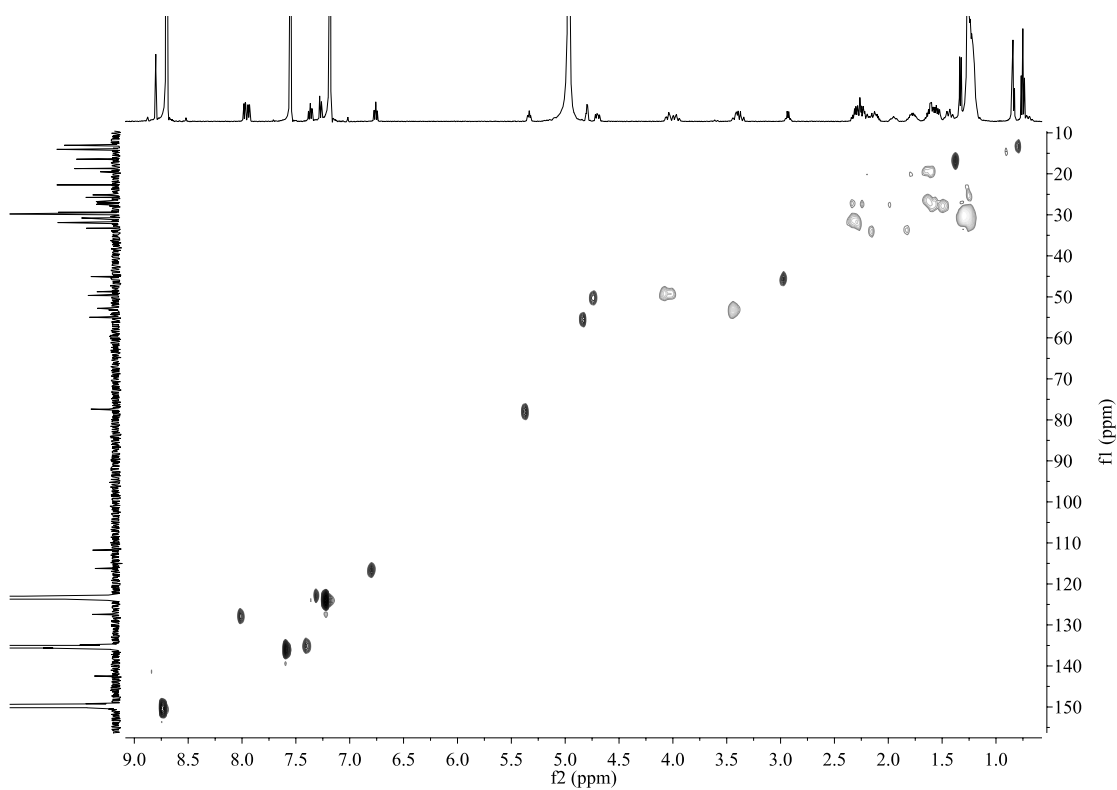

**Fig. S12e** HSQC (500 MHz/125 MHz, Pyridine-*d*<sub>5</sub>) spectrum of **12a**

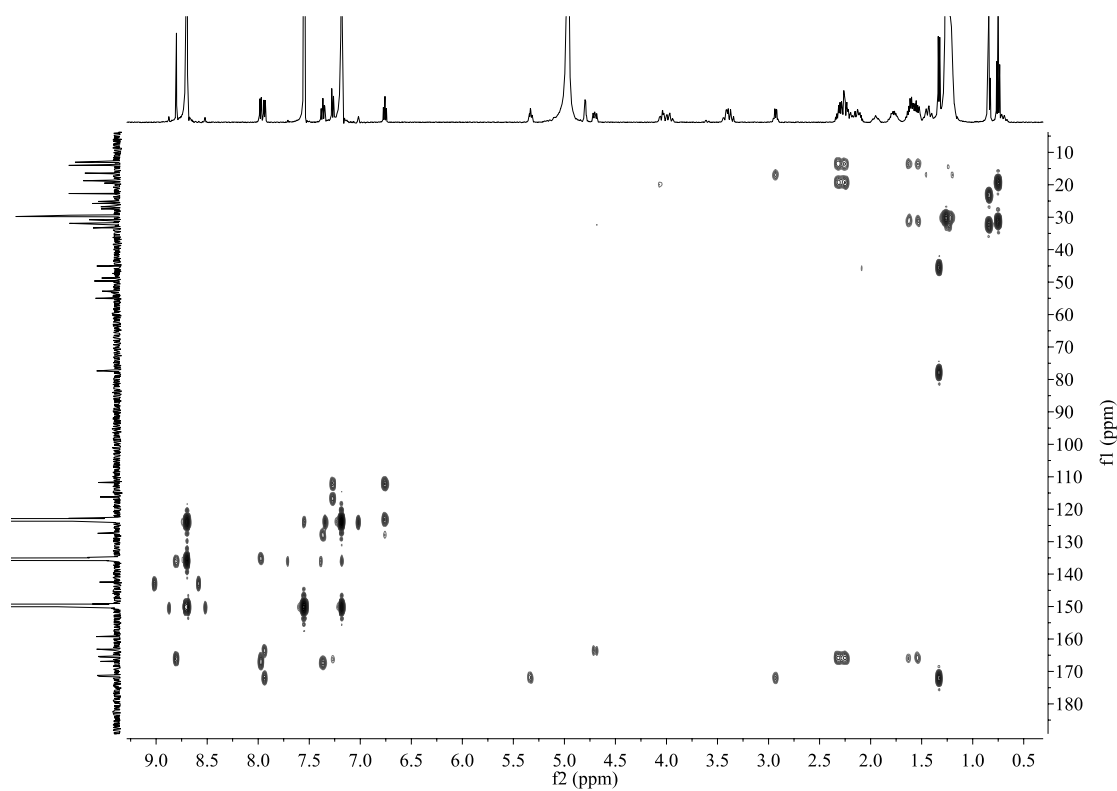

**Fig. S12f** HMBC (500 MHz/125 MHz, Pyridine-*d*<sub>5</sub>) spectrum of **12a**

**Table S13** NMR data (<sup>1</sup>H NMR 500 MHz, <sup>13</sup>C NMR 125 MHz, CDCl<sub>3</sub>) of **13**

| Pos. | $\delta_C$ | $\delta_H$ , mult ( <i>J</i> in Hz) |
|------|------------|-------------------------------------|
|------|------------|-------------------------------------|

|        |       |                                                  |
|--------|-------|--------------------------------------------------|
| 1      | 198.3 |                                                  |
| 2      | 45.9  | 2.93, dd (16.0, 4.9)<br>2.18, m                  |
| 3      | 37.2  | 2.55, dd (15.4, 11.3)                            |
| 4      | 36.6  | 2.98, br dd (17.4, 3.5)<br>2.66, dd (16.4, 10.9) |
| 4a     | 153.0 |                                                  |
| 5      | 121.5 | 6.99, s                                          |
| 6      | 163.7 |                                                  |
| 6a     | 117.6 |                                                  |
| 7      | 189.5 |                                                  |
| 7a     | 119.6 |                                                  |
| 8      | 157.2 |                                                  |
| 9      | 120.4 | 7.66, d (8.5)                                    |
| 10     | 137.1 | 7.76, t (8.4)                                    |
| 11     | 121.4 | 7.84, d (7.5)                                    |
| 11a    | 137.7 |                                                  |
| 12     | 184.1 |                                                  |
| 12a    | 137.5 |                                                  |
| 12b    | 129.3 |                                                  |
| 13     | 29.0  | 1.53, m                                          |
| 14     | 11.3  | 1.00, t (7.4)                                    |
| 1'     | 95.8  | 5.75, br d (3.0)                                 |
| 2'     | 33.4  | 2.24, br dd (15.0, 1.6)<br>2.35, dt (15.1, 4.1)  |
| 3'     | 47.3  | 4.67, m                                          |
| 4'     | 74.7  | 3.60, dd (9.9, 2.5)                              |
| 5'     | 66.2  | 3.86, m                                          |
| 6'     | 17.5  | 1.25, d (6.2)                                    |
| 3'-NAc | 174.5 |                                                  |
| 3'-NAc | 23.1  | 2.27, s                                          |
| 6-OH   |       | 12.96, s                                         |
| 3-NH   |       | 8.53, br d (6.5)                                 |

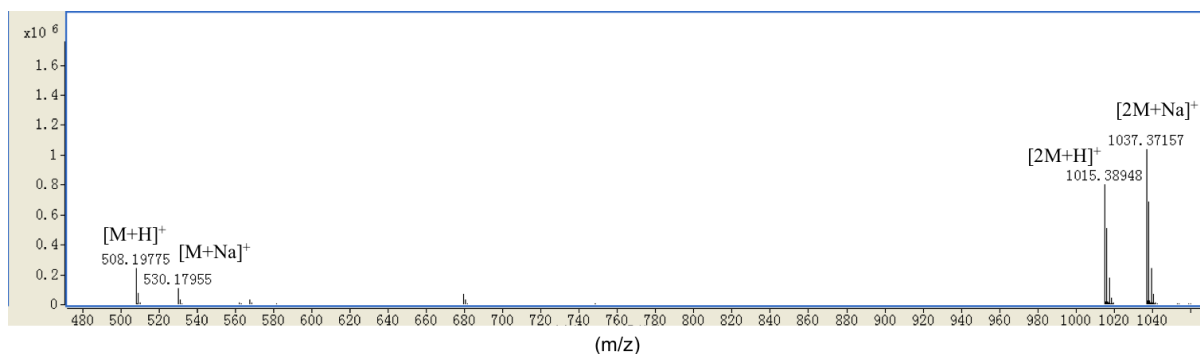

**Fig. S13a** HR-ESI-MS spectrum of **13**



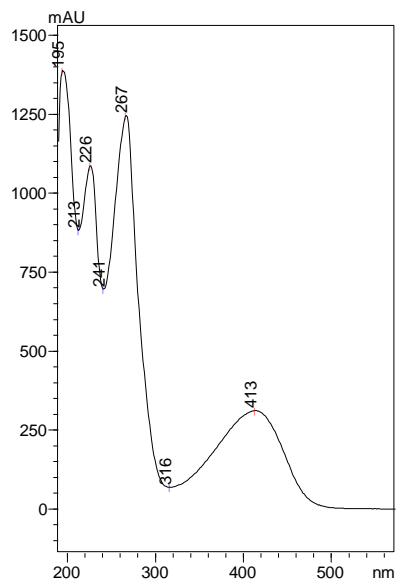

**Fig. S13b** UV-vis spectrum of **13**

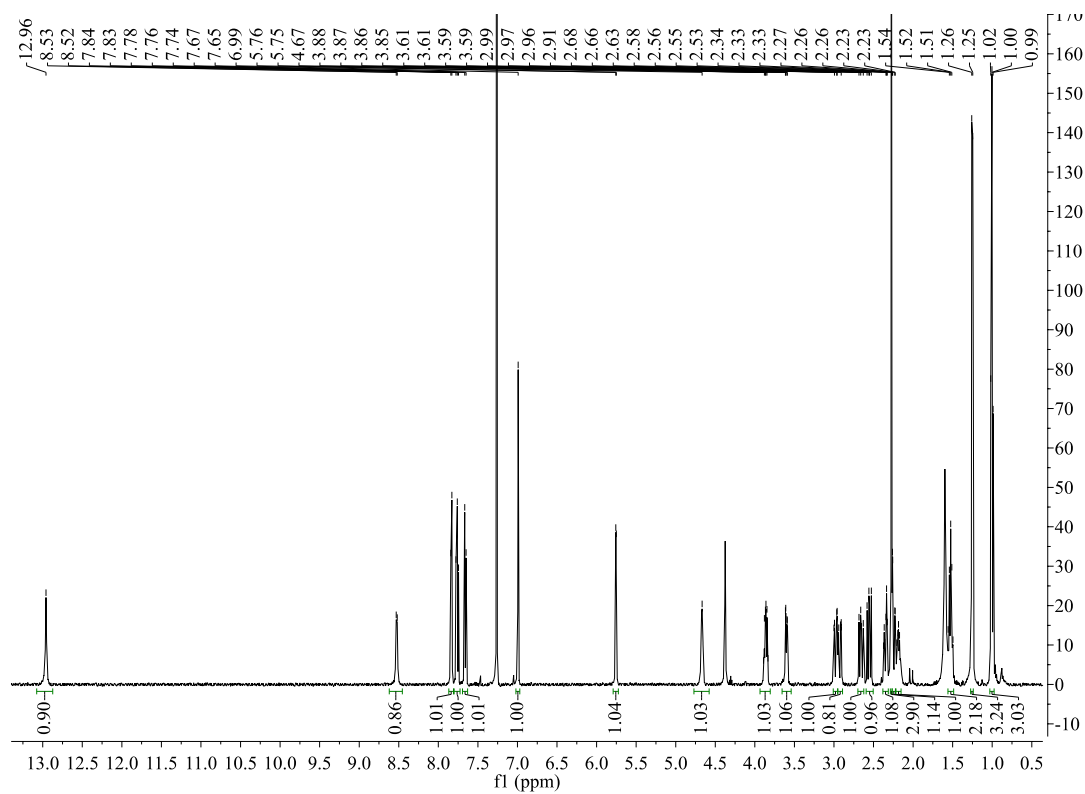

**Fig. S13c** <sup>1</sup>H NMR (500 MHz, CDCl<sub>3</sub>) spectrum of **13**

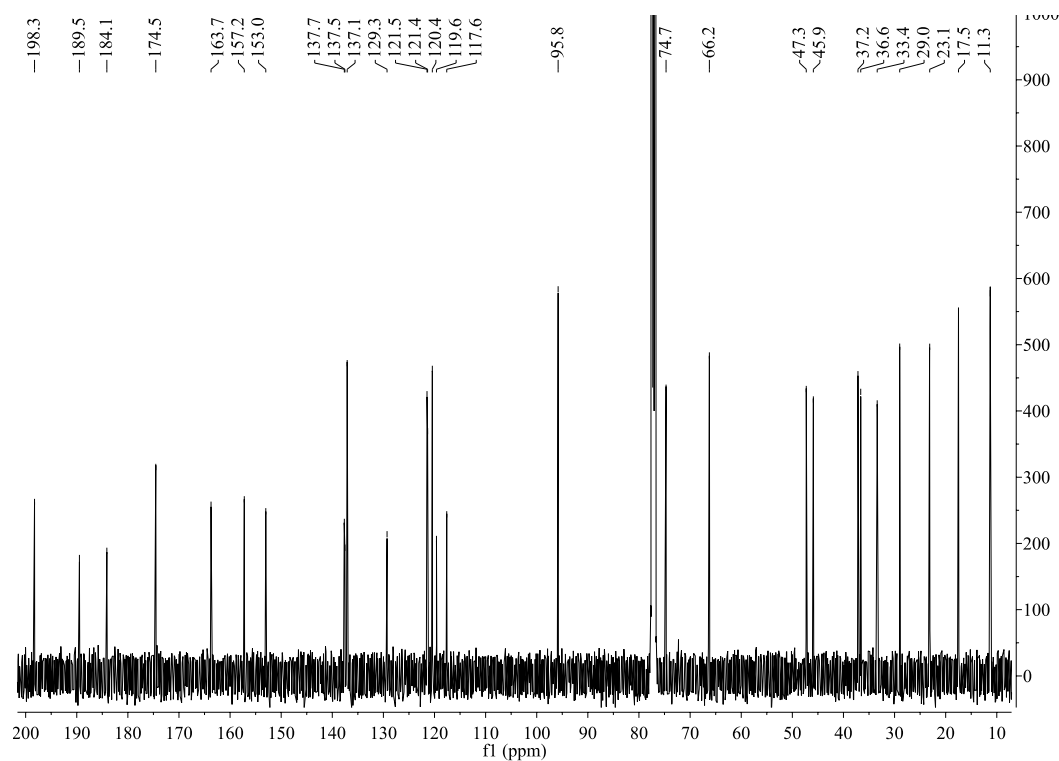

**Fig. S13d**  $^{13}\text{C}$  NMR (125 MHz,  $\text{CDCl}_3$ ) spectrum of **13**

**Table S14** NMR data ( $^1\text{H}$  NMR 500 MHz,  $^{13}\text{C}$  NMR 125 MHz,  $\text{CD}_3\text{OD}$ ) of **14**

| Pos. | $\delta_{\text{C}}$ | $\delta_{\text{H}}$ , mult ( $J$ in Hz) | COSY  | HMBC                 |
|------|---------------------|-----------------------------------------|-------|----------------------|
| 1    | 200.3               |                                         |       |                      |
| 2    | 49.1                | 2.83, dd (15.5, 4.7)                    | 2b, 3 | 1                    |
|      |                     | 2.53, m                                 | 3     | 1, 3, 13             |
| 3    | 31.9                | 2.38, m                                 |       |                      |
| 4    | 39.2                | 3.02, dd (16.7, 3.9)                    | 3, 4b | 4a, 12b              |
|      |                     | 2.7, dd (16.7, 10.6)                    | 3     | 2, 3, 4a, 5, 12b, 13 |
| 4a   | 154.6               |                                         |       |                      |
| 5    | 122.1               | 7.08, s                                 |       | 4, 6, 6a, 12b        |
| 6    | 164.8               |                                         |       |                      |
| 6a   | 119.0               |                                         |       |                      |
| 7    | 190.2               |                                         |       |                      |
| 7a   | 122.1               |                                         |       |                      |
| 8    | 158.4               |                                         |       |                      |
| 9    | 121.7               | 7.75, d (9.0)                           |       | 11                   |
| 10   | 137.8               | 7.83, t (8.0)                           |       | 8, 11a               |
| 11   | 121.2               | 7.73, d (7.7)                           |       | 8, 12                |
| 11a  | 138.8               |                                         |       |                      |
| 12   | 185.6               |                                         |       |                      |
| 12a  | 139.0               |                                         |       |                      |
| 12b  | 129.3               |                                         |       |                      |
| 13   | 21.6                | 1.18, d (6.6)                           |       | 2, 3, 4              |
| 1'   | 96.8                | 5.97, d (3.2)                           | 2'a   | 3', 5'               |

|        |       |                      |         |            |
|--------|-------|----------------------|---------|------------|
| 2'     | 34.4  | 2.35, m              | 2'b     |            |
|        |       | 2.22, dd (15.0, 1.4) |         | 1', 3', 4' |
| 3'     | 47.4  | 4.65, m              | 2'a, 4' |            |
| 4'     | 73.7  | 3.52, dd (10.0, 4.3) |         | 5', 6'     |
| 5'     | 66.9  | 3.83, m              | 4', 6'  |            |
| 6'     | 18.1  | 1.19, d (6.2)        |         | 4', 5'     |
| 3'-NAc | 174.5 |                      |         |            |
| 3'-NAc | 23.4  | 2.25, s              |         | 3'-NAc     |

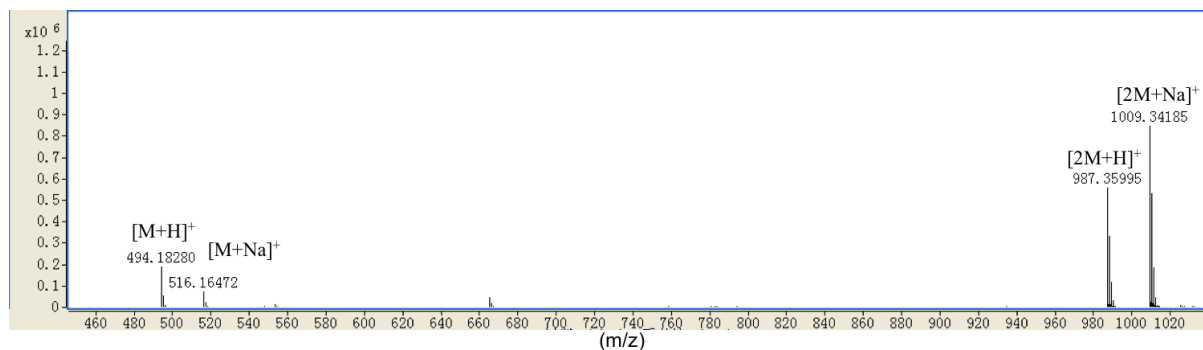

**Fig. S14a** HR-ESI-MS spectrum of **14**

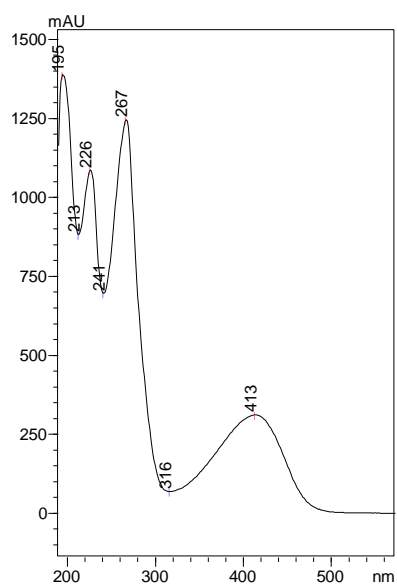

**Fig. S14b** UV-vis spectrum of **14**

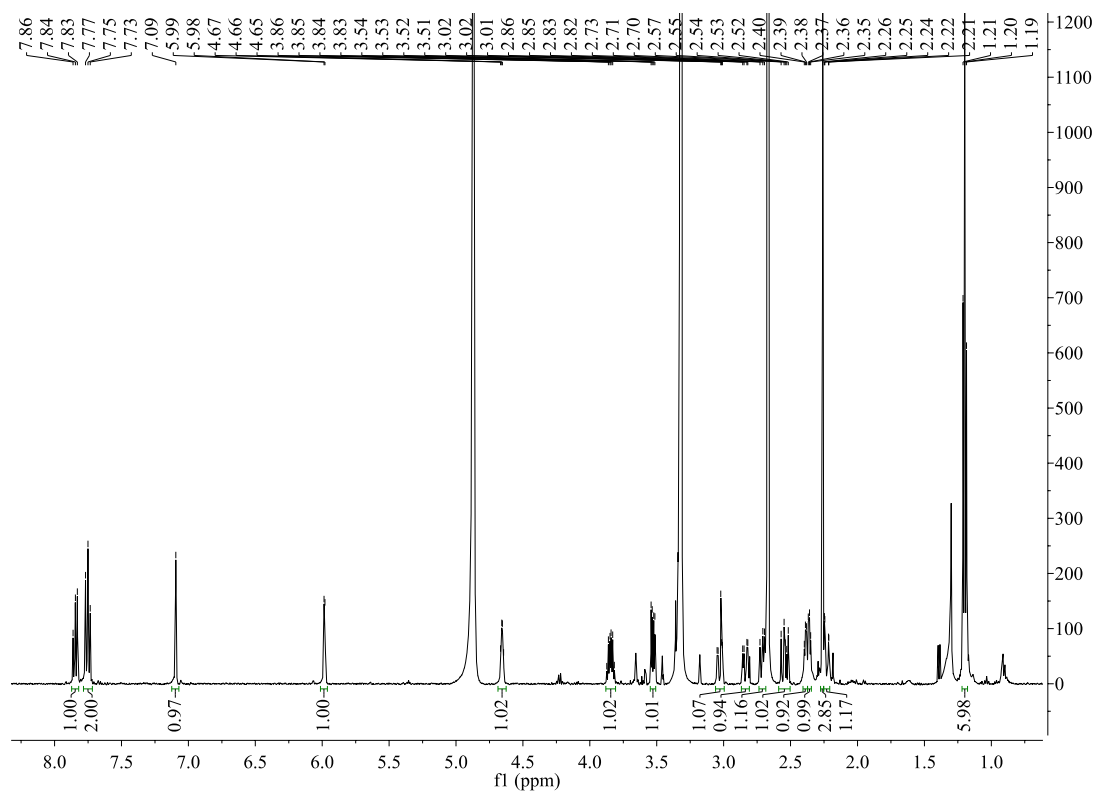

Fig. S14c  $^1\text{H}$  NMR (500 MHz,  $\text{CD}_3\text{OD}$ ) spectrum of **14**

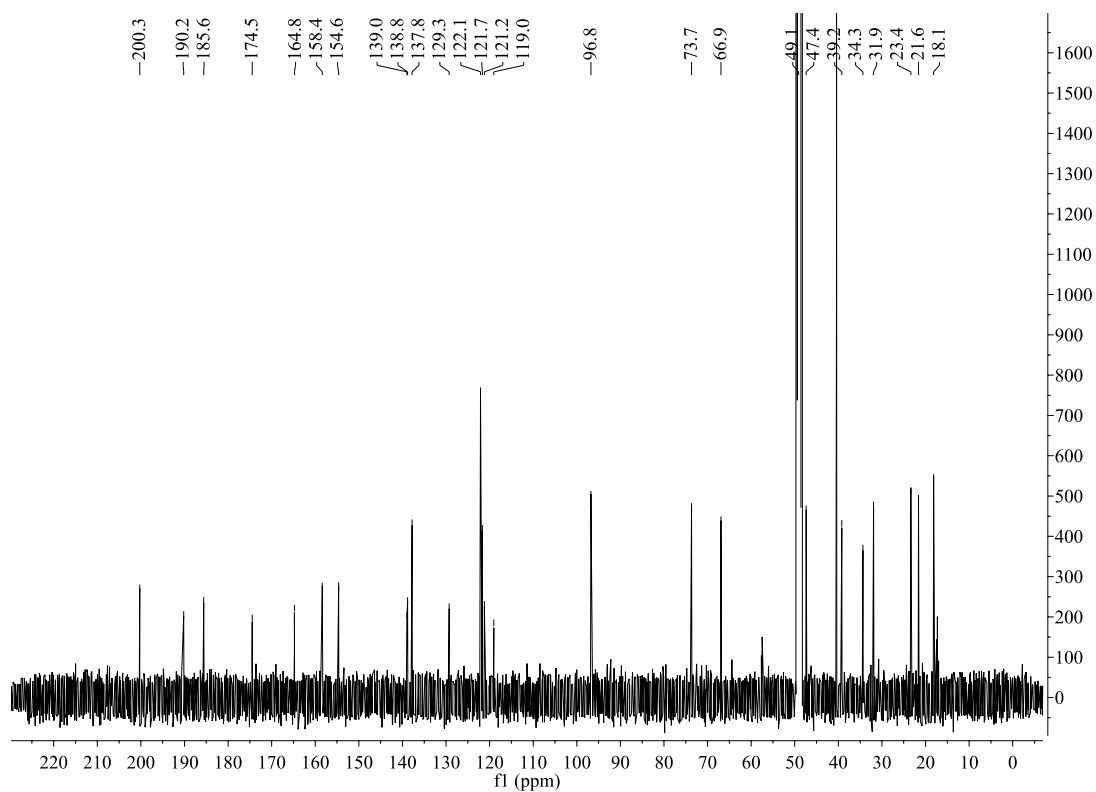

Fig. S14d  $^{13}\text{C}$  NMR (125 MHz,  $\text{CD}_3\text{OD}$ ) spectrum of **14**

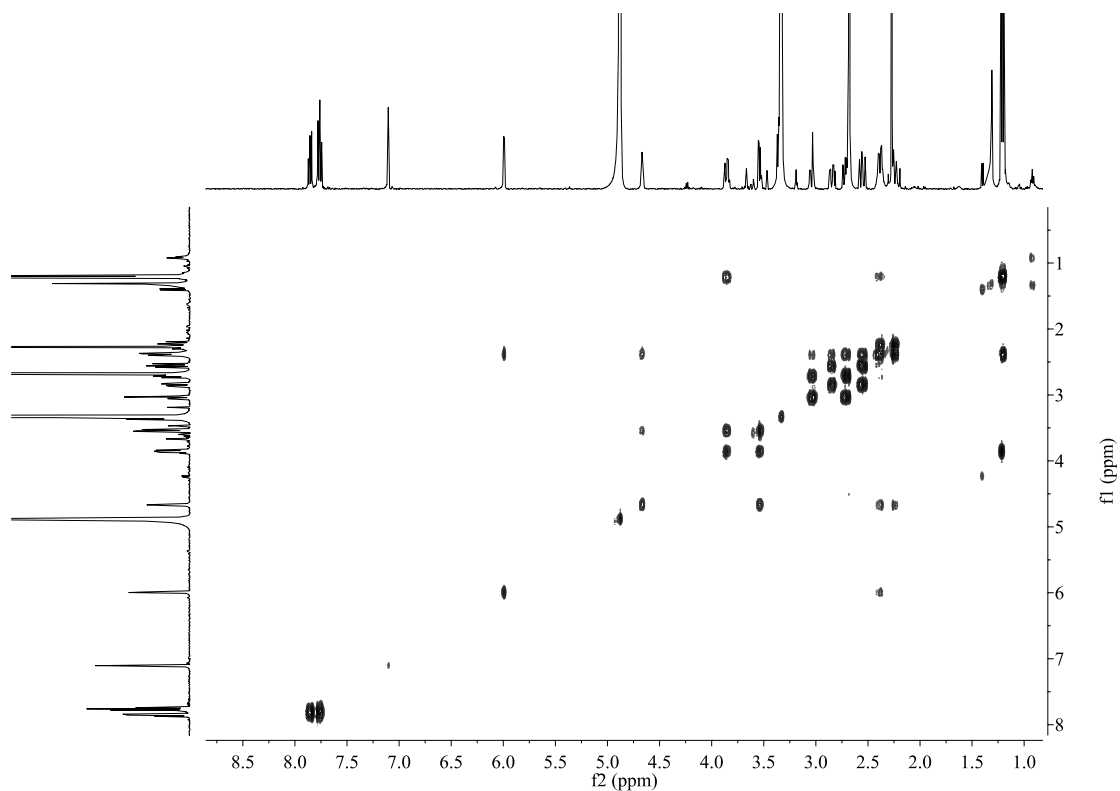

**Fig. S14e**  $^1\text{H}$ - $^1\text{H}$  COSY (500 MHz,  $\text{CD}_3\text{OD}$ ) spectrum of **14**

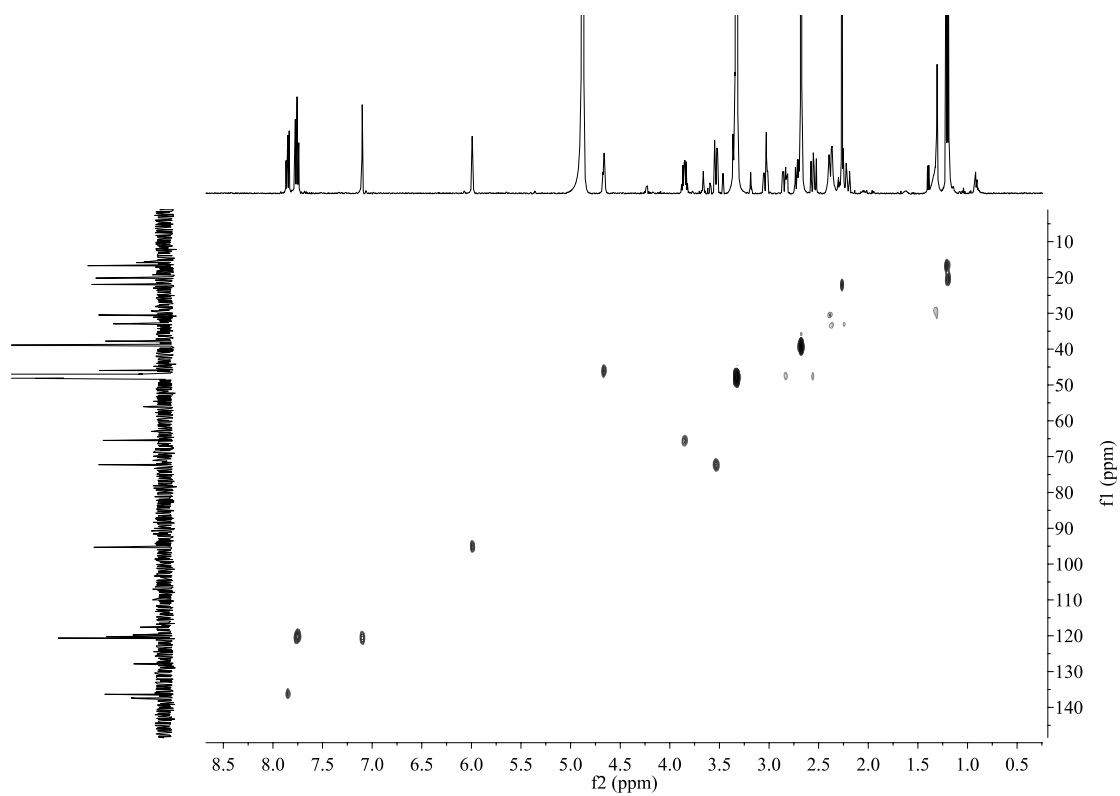

**Fig. S14f** HSQC (500 MHz/125 MHz,  $\text{CD}_3\text{OD}$ ) spectrum of **14**

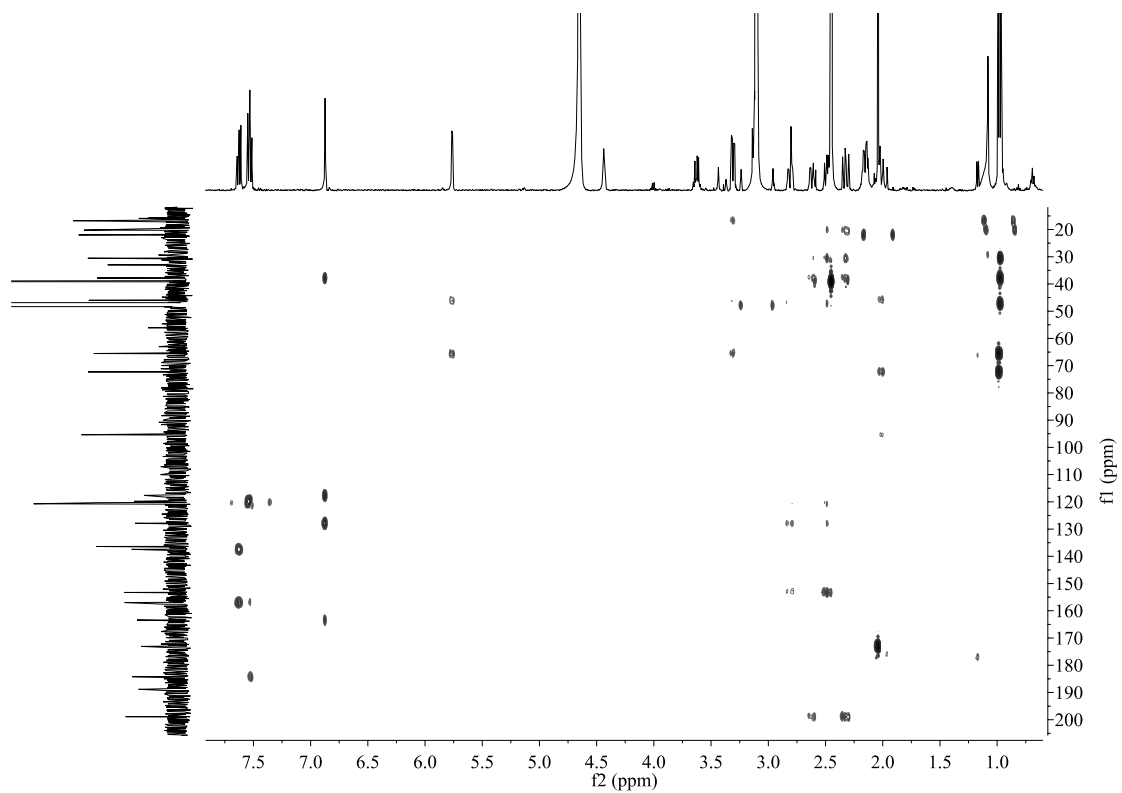

**Fig. S14g** HMBC (500 MHz/125 MHz, CD<sub>3</sub>OD) spectrum of **14**

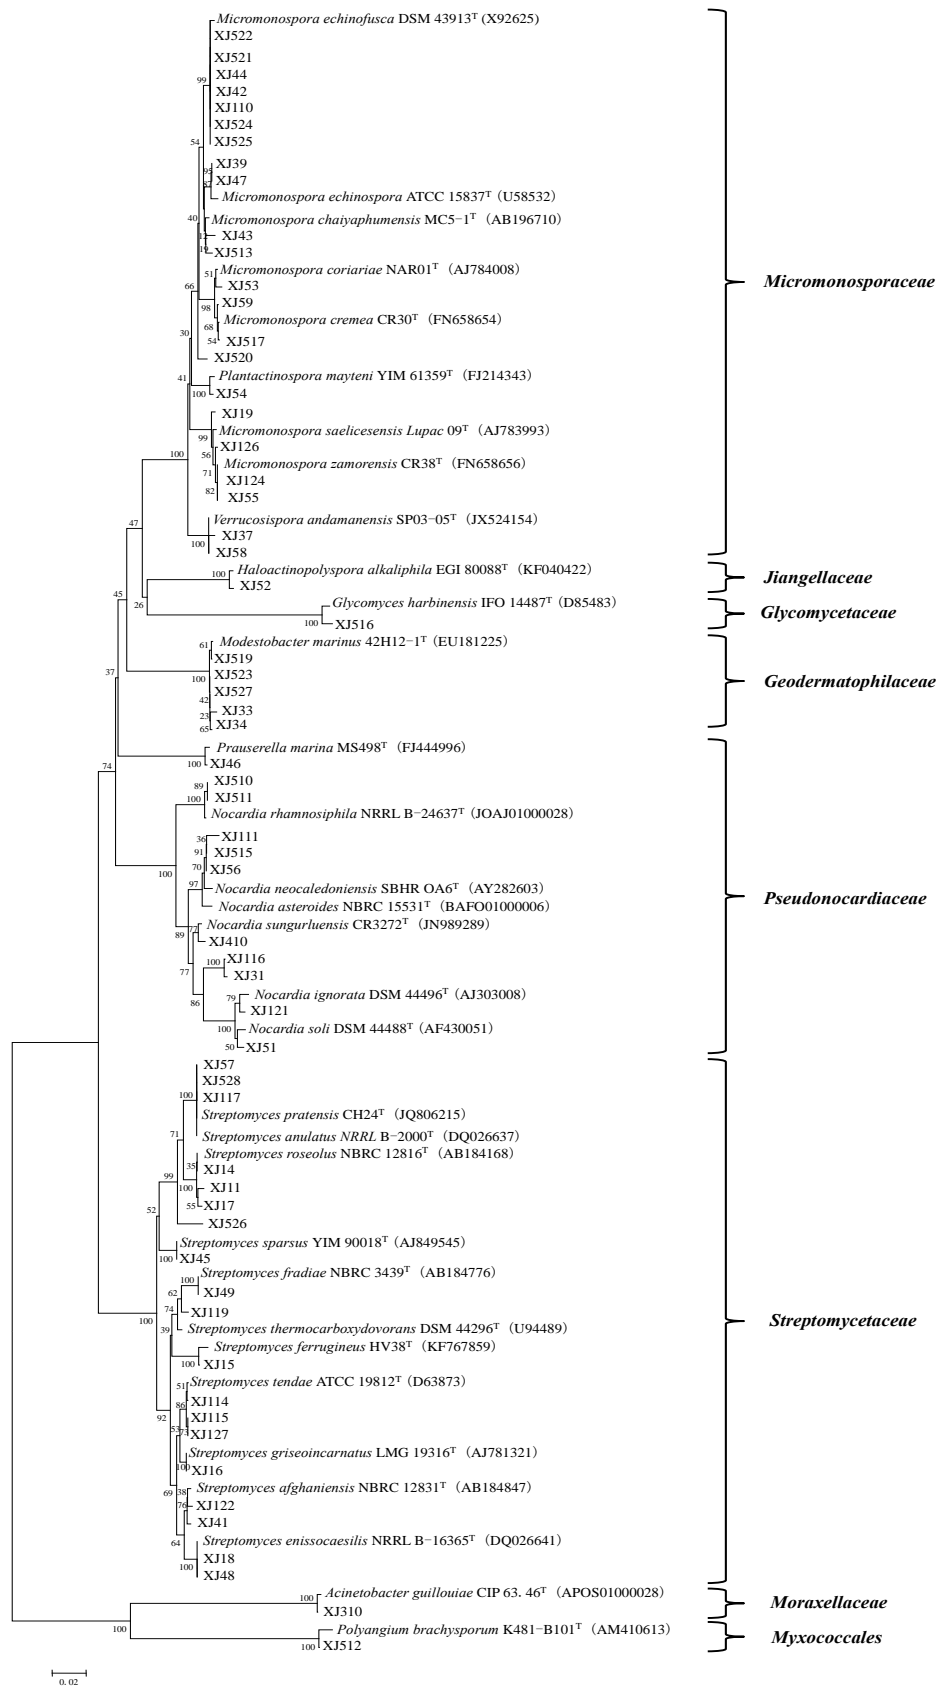

**Fig. S15** Neighbor-joining phylogenetic tree of 16S rRNA gene sequences of 59 actinomycetes (including 19 strains *Streptomyces* and 40 strains rare actinomycetes) and related species constructed by MEGA 7.0. Numbers at nodes indicate levels of bootstrap support (%) based on a neighbor-joining analysis of 1000 resampled datasets. NCBI accession numbers are given. Bar, 0.02 nucleotide substitutions per site.

### Virtual screen of isolated compounds 1–12 for potential virus polymerase inhibitor

For molecular docking, the 3'-RNA pocket of Lassa virus polymerase (PDB ID: 6KLC), Machupo virus polymerase (PDB ID: 6KLE), Influenza A virus polymerase (PDB ID: 6QX3), and Influenza D virus polymerase (PDB ID: 6KUJ) was extracted as the receptors. The compounds were initially cleaned by the Lipinski's rule of five (Structures violating more than three of Lipinski's rules were discarded). The remaining compounds were docked into the 3'-RNA pockets of four virus polymerases using GOLD16 program. The parameter files for docking was prepared using Hermes. The box dimension for docking calculation was set to 10 Å to allow enough space for orientation sampling.

**Table S13** The binding affinities of isolated compounds 1–12 and via virtual docking approach

| Compound  | Binding affinities (%) |       |        |        |         |
|-----------|------------------------|-------|--------|--------|---------|
|           | 6klc                   | 6kle  | 6kuj   | 6qx3   | average |
| <b>1</b>  | 86.64                  | 87.85 | 104.48 | 93.14  | 93.02   |
| <b>2</b>  | 92.41                  | 92.86 | 98.32  | 101.77 | 96.34   |
| <b>3</b>  | 95.4                   | 93.3  | 99.7   | 103.55 | 97.98   |
| <b>4</b>  | 92.98                  | 90.38 | 100.29 | 98.06  | 95.42   |
| <b>5</b>  | 97.5                   | 87.09 | 103.38 | 98.16  | 96.53   |
| <b>6</b>  | 98.99                  | 84.8  | 100.26 | 102.26 | 96.57   |
| <b>7</b>  | 96.16                  | 93.86 | 108.25 | 102.73 | 100.25  |
| <b>8</b>  | 94.47                  | 85.17 | 101.26 | 99.66  | 95.14   |
| <b>9</b>  | 98.51                  | 83.4  | 99.53  | 97.96  | 94.85   |
| <b>10</b> | 93.57                  | 93.14 | 100.6  | 104.64 | 97.98   |
| <b>11</b> | 105.58                 | 93.15 | 98.95  | 101.89 | 99.89   |
| <b>12</b> | 101.15                 | 89.34 | 95.7   | 97.3   | 95.87   |
